# Supplementary material for: Diversity and design of metal-based carbon monoxide-releasing molecules (CO-RMs) in aqueous systems: revealing the essential trends
Source: Royal Society of Chemistry journal article supplement (doi:10.1039/b822157j), 2009-01-01
Supplement: b822157j.pdf [file b822157j.pdf]

## Supplementary Information

### *Diversity and Design of Metal-Based Carbon Monoxide-Releasing Molecules (CO-RMs) in Aqueous Systems: Revealing the Essential Trends*

Wei-Qiang Zhang, Anthony J. Atkin, Robert J. Thatcher, Adrian C. Whitwood, Ian J. S. Fairlamb and Jason M. Lynam\*

*Department of Chemistry, University of York, Heslington, York, YO10 5DD, UK*

|       |                                                                                                                                              |    |
|-------|----------------------------------------------------------------------------------------------------------------------------------------------|----|
| 1.    | CO-Release Tests.....                                                                                                                        | 2  |
| 1.1.  | [NEt <sub>4</sub> ][V(CO) <sub>6</sub> ] .....                                                                                               | 3  |
| 1.2.  | MnBr(CO) <sub>5</sub> .....                                                                                                                  | 5  |
| 1.3.  | FeI <sub>2</sub> (CO) <sub>4</sub> .....                                                                                                     | 7  |
| 1.4.  | mer-FeI <sub>2</sub> (CO) <sub>3</sub> (P{OCH <sub>3</sub> } <sub>3</sub> ).....                                                             | 9  |
| 1.5.  | mer-FeI <sub>2</sub> (CO) <sub>3</sub> (P{CH <sub>2</sub> OH} <sub>3</sub> ).....                                                            | 11 |
| 1.6.  | all cis-FeI <sub>2</sub> (CO) <sub>2</sub> (P{OCH <sub>3</sub> } <sub>3</sub> ) <sub>2</sub> .....                                           | 13 |
| 1.7.  | cis,cis,trans-FeI <sub>2</sub> (CO) <sub>2</sub> (P{OCH <sub>3</sub> } <sub>3</sub> ) <sub>2</sub> .....                                     | 15 |
| 1.8.  | Comparison of CO-release Data for Iron Phosphine Complexes .....                                                                             | 17 |
| 1.9.  | [NEt <sub>4</sub> ][CrCl(CO) <sub>5</sub> ].....                                                                                             | 19 |
| 1.10. | [NEt <sub>4</sub> ][CrBr(CO) <sub>5</sub> ] .....                                                                                            | 21 |
| 1.11. | [NEt <sub>4</sub> ][CrI(CO) <sub>5</sub> ] .....                                                                                             | 23 |
| 1.12. | [NEt <sub>4</sub> ][MoCl(CO) <sub>5</sub> ] .....                                                                                            | 25 |
| 1.13. | [NEt <sub>4</sub> ][MoBr(CO) <sub>5</sub> ].....                                                                                             | 27 |
| 1.14. | [NEt <sub>4</sub> ][MoI(CO) <sub>5</sub> ].....                                                                                              | 29 |
| 1.15. | [NEt <sub>4</sub> ][WCl(CO) <sub>5</sub> ].....                                                                                              | 31 |
| 1.16. | [NEt <sub>4</sub> ][WBr(CO) <sub>5</sub> ].....                                                                                              | 33 |
| 1.17. | [NEt <sub>4</sub> ][WI(CO) <sub>5</sub> ] .....                                                                                              | 35 |
| 1.18. | [NEt <sub>4</sub> ][{Cr(CO) <sub>5</sub> } <sub>2</sub> (μ-Cl)] .....                                                                        | 37 |
| 1.19. | [NEt <sub>4</sub> ][{Cr(CO) <sub>5</sub> } <sub>2</sub> (μ-Br)] .....                                                                        | 39 |
| 1.20. | [NEt <sub>4</sub> ][{Cr(CO) <sub>5</sub> } <sub>2</sub> (μ-Br)] incubated in DMSO for 6 min .....                                            | 41 |
| 1.21. | [NEt <sub>4</sub> ][{Cr(CO) <sub>5</sub> } <sub>2</sub> (μ-Br)] incubated in DMSO for 30 min .....                                           | 43 |
| 1.22. | Comparison of CO-release from [NEt <sub>4</sub> ][{Cr(CO) <sub>5</sub> } <sub>2</sub> (μ-Br)] after incubated in DMSO. ....                  | 45 |
| 1.23. | Cr(=C{OCH <sub>3</sub> }CH <sub>3</sub> )(CO) <sub>5</sub> .....                                                                             | 47 |
| 1.24. | Mo(=C{OCH <sub>3</sub> }CH <sub>3</sub> )(CO) <sub>5</sub> .....                                                                             | 49 |
| 1.25. | W(=C{OCH <sub>3</sub> }CH <sub>3</sub> )(CO) <sub>5</sub> .....                                                                              | 51 |
| 1.26. | [NEt <sub>4</sub> ][MoI <sub>3</sub> (CO) <sub>4</sub> ] .....                                                                               | 53 |
| 1.27. | [NEt <sub>4</sub> ][WI <sub>3</sub> (CO) <sub>4</sub> ].....                                                                                 | 55 |
| 1.28. | W(κ <sup>2</sup> -acac) <sub>2</sub> (CO) <sub>3</sub> .....                                                                                 | 57 |
| 2.    | Degradation Tests .....                                                                                                                      | 59 |
| 2.1.  | Degradation test of [NEt <sub>4</sub> ][CrBr(CO) <sub>5</sub> ] in DCM.....                                                                  | 59 |
| 2.2.  | Degradation test of [NEt <sub>4</sub> ][CrI(CO) <sub>5</sub> ] in methanol.....                                                              | 63 |
| 2.3.  | Independent Carbonylation of [NEt <sub>4</sub> ][CrI(CO) <sub>5</sub> ] in methanol .....                                                    | 64 |
| 2.4.  | Reaction of [NEt <sub>4</sub> ][CrCl(CO) <sub>5</sub> ] and [NEt <sub>4</sub> ][{Cr(CO) <sub>5</sub> } <sub>2</sub> (μ-Cl)]. With DMSO. .... | 65 |
| 2.5.  | Degradation tests of [NEt <sub>4</sub> ][V(CO) <sub>6</sub> ] .....                                                                          | 67 |

## 1. CO-Release Tests

The release of CO from metal carbonyl compounds was studied spectrophotometrically by measuring the conversion of deoxy-myoglobin (deoxy-Mb) to carbonmonoxy myoglobin (Mb-CO).<sup>1</sup> The amount of Mb-CO formed was quantified by measuring the absorbance at 540 nm. A stock solution of myoglobin (lyophilised horse heart) (66  $\mu\text{M}$  final concentration) was prepared fresh by dissolving the protein in phosphate buffered saline (PBS) (0.01M, pH = 7.4). Sodium dithionite (0.1%) was added to convert the myoglobin stock to deoxy-Mb. A 2 ml quantity of this was measured to obtain a deoxy-Mb spectrum and then bubbled with CO to get a Mb-CO spectrum. CO-RMs were dissolved in an appropriate solvent (DMSO or EtOH) (4, 8, 12  $\mu\text{M}$ ) and added to deoxy-Mb in the cuvette (to give a final CO-RM concentration of 20, 40, 60  $\mu\text{M}$ ), mixed using a pipette and then overlaid with 500  $\mu\text{L}$  light mineral oil to prevent CO escaping or the myoglobin being oxygenated. This is the standard procedure; other experiments have been undertaken using different concentrations of myoglobin and different concentrations of DMSO.

The maximal absorption peak of deoxy-Mb at 560 nm is converted to the two maximal absorption peaks of Mb-CO at 540 and 578 nm. The concentration of myoglobin in the stock solution was calculated from the maximal absorption peak of the Mb-CO solution at 540 nm (Equation 1).

**Equation 1.** Equation for calculating total myoglobin concentration in a saturated solution of Mb-CO.  $\epsilon$  = extinction coefficient of Mb-CO =  $15.4 \text{ mM}^{-1}\text{cm}^{-1}$ ,  $\text{OD}_{540}$  = absorbance of Mb-CO solution at 540 nm.

$$\text{Mb-CO}_{\text{max}} = (\text{OD}_{540} / \epsilon) \times 1000$$

Intermediate concentrations of Mb-CO are calculated from the  $\text{OD}_{540}$ . A new extinction coefficient ( $\epsilon_2$ ) must be calculated to take into account the change in absorbance at 540 nm ( $\Delta\text{OD}_{540}$ ). To aid in the accuracy of this calculation, another wavelength is used as a constant reference point. The deoxy-Mb and Mb-CO spectra share four isosbestic ( $\text{OD}_{\text{iso}}$ ) points (510, 550, 570, 585 nm). The value at 510 nm ( $\text{OD}_{\text{iso}510}$ ) was used in this set of experiments. The new extinction coefficient was calculated (Equation 2).

**Equation 2.** Equation needed to calculate unknown Mb-CO extinction coefficient.  $\Delta\text{OD}_{\text{iso}510}$  = change in absorbance at the isosbestic point,  $\Delta\text{OD}_{540}$  = change in absorbance at 540 nm,  $\text{Mb-CO}_{\text{max}}$  = maximum concentration of myoglobin.  $\epsilon_2$  = new extinction coefficient.

$$\epsilon_2 = (\Delta\text{OD}_{540} - \Delta\text{OD}_{\text{iso}510} \times 1000) / \text{Mb-CO}_{\text{max}}$$

From the new extinction coefficient and the change in absorbance at 540 and 510 nm will give the concentration of myoglobin in any unknown sample. (Equation 3)

**Equation 3.** Equation to calculate the Mb-CO concentration in samples.  $\Delta\text{OD}_{540}$  = change in absorbance at 540 nm,  $\Delta\text{OD}_{\text{iso}510}$  = change in absorbance at the isosbestic point,  $\epsilon_2$  = calculated absorption coefficient.

$$\text{Mb-CO} = 1000 \times (\Delta\text{OD}_{540} - \Delta\text{OD}_{\text{iso}510}) / \epsilon_2$$

The resulting curves for the formation of Mb-CO versus time were fitted using non-linear regression routines in SigmaPlot,<sup>2</sup> resulting  $R^2$  values were typically greater than 0.99. Half lives for CO-release were determined by extrapolating the equations generation from the non-linear regression to 30  $\mu\text{M}$ , 20  $\mu\text{M}$  and 10  $\mu\text{M}$  Mb-CO for initial CO-RM concentrations of 60  $\mu\text{M}$ , 40  $\mu\text{M}$  and 20 $\mu\text{M}$  respectively. The same method was employed for CO-RM which exhibited slow release for Mb-CO concentrations of 15  $\mu\text{M}$ , 10  $\mu\text{M}$  and 5  $\mu\text{M}$  respectively.

1 R. Motterlini, J. E Clark, R. Foresti, P. Sarathchandra, B. E. Mann and C. J. Green, *Circ. Res.*, 2002, **90**, 1.  
2 SigmaPlot Version 10.0 Systat Software, Inc

### 1.1. $[\text{NEt}_4][\text{V}(\text{CO})_6]$

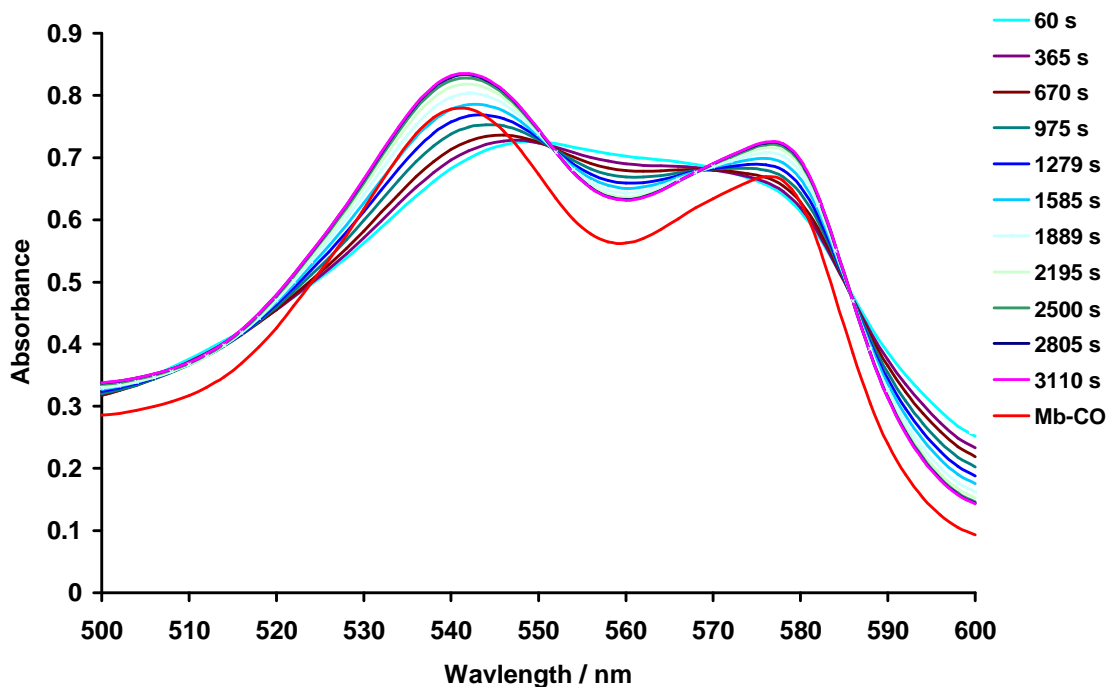

**Fig. 1.** The changes in the UV spectrum of myoglobin as CO is released from  $[\text{NEt}_4][\text{V}(\text{CO})_6]$  (60 μm).

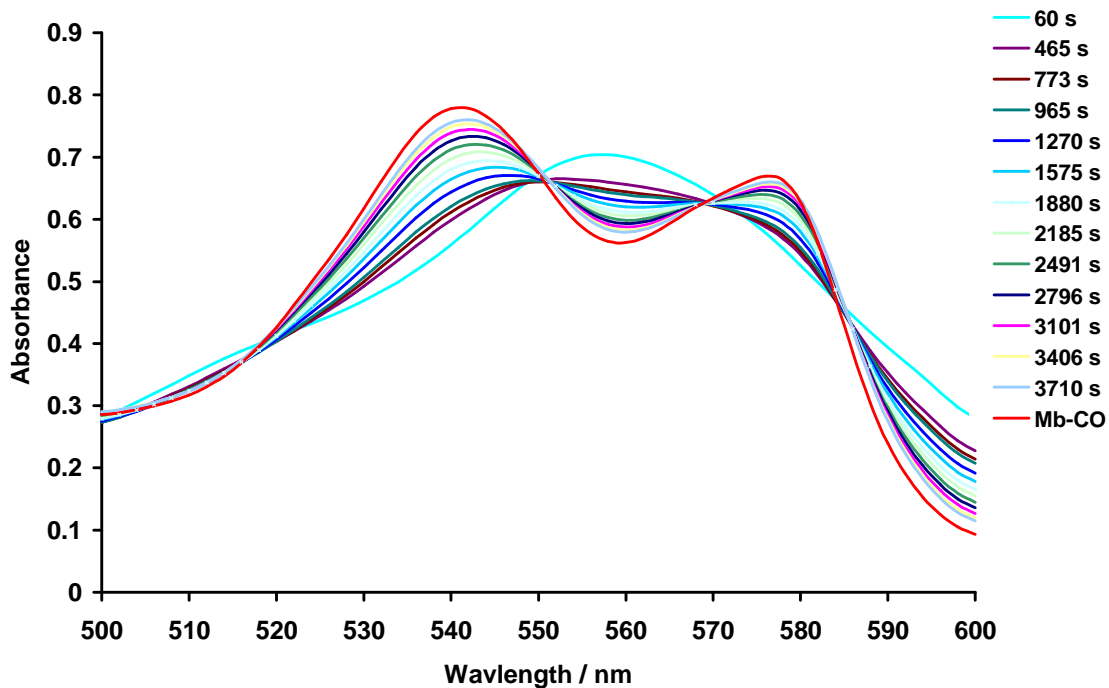

**Fig. 2.** The changes in the UV spectrum of myoglobin as CO is released from  $[\text{NEt}_4][\text{V}(\text{CO})_6]$  (40 μm).

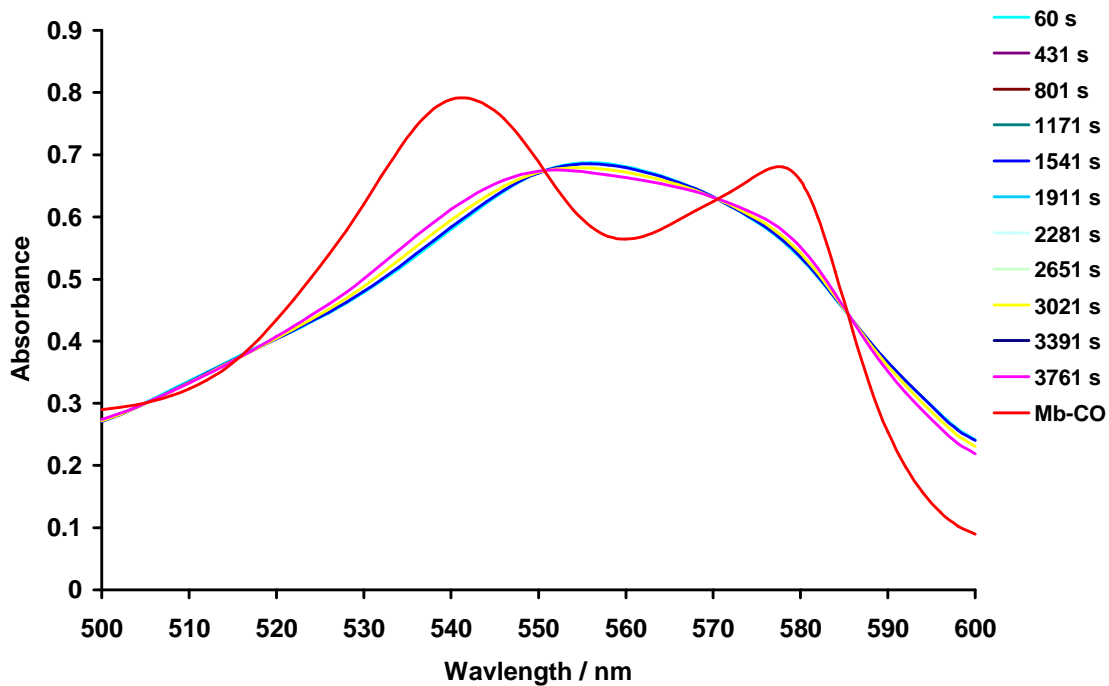

Fig. 3. The changes in the UV spectrum of myoglobin as CO is released from  $[\text{NEt}_4][\text{V}(\text{CO})_6]$  ( $20\mu\text{M}$ ).

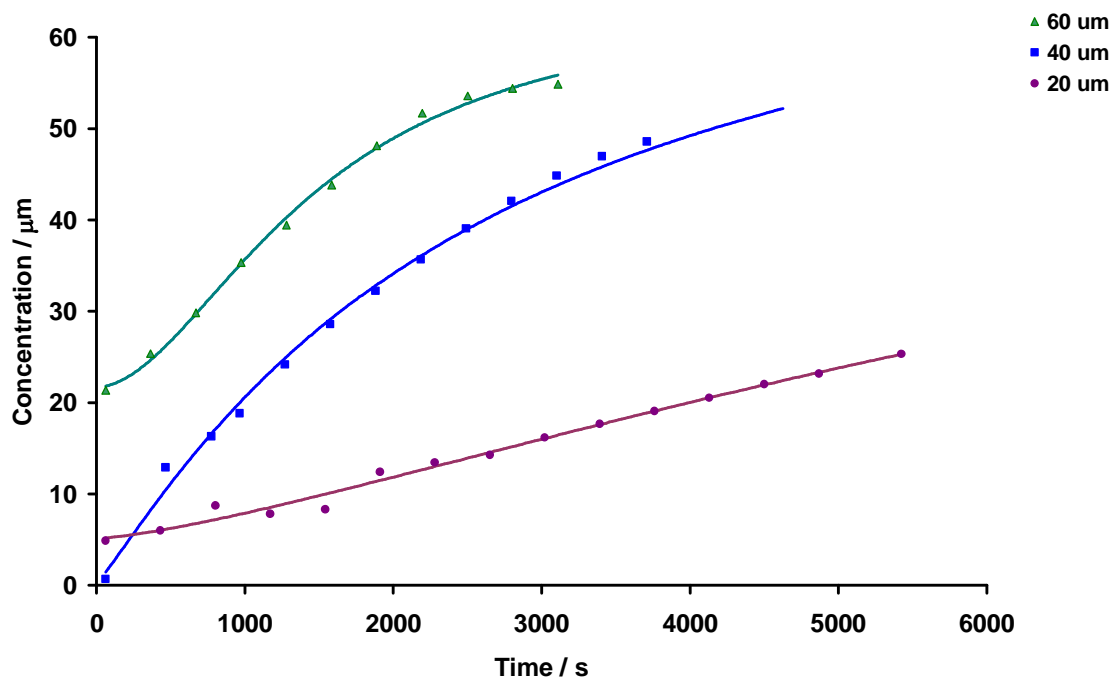

Fig. 4. Formation of MbCO over time after addition of  $60\mu\text{M}$ ,  $40\mu\text{M}$  and  $20\mu\text{M}$  of  $[\text{NEt}_4][\text{V}(\text{CO})_6]$  in DMSO to an aqueous solution containing deoxy-myoglobin at pH 7.4.

## 1.2. $MnBr(CO)_5$

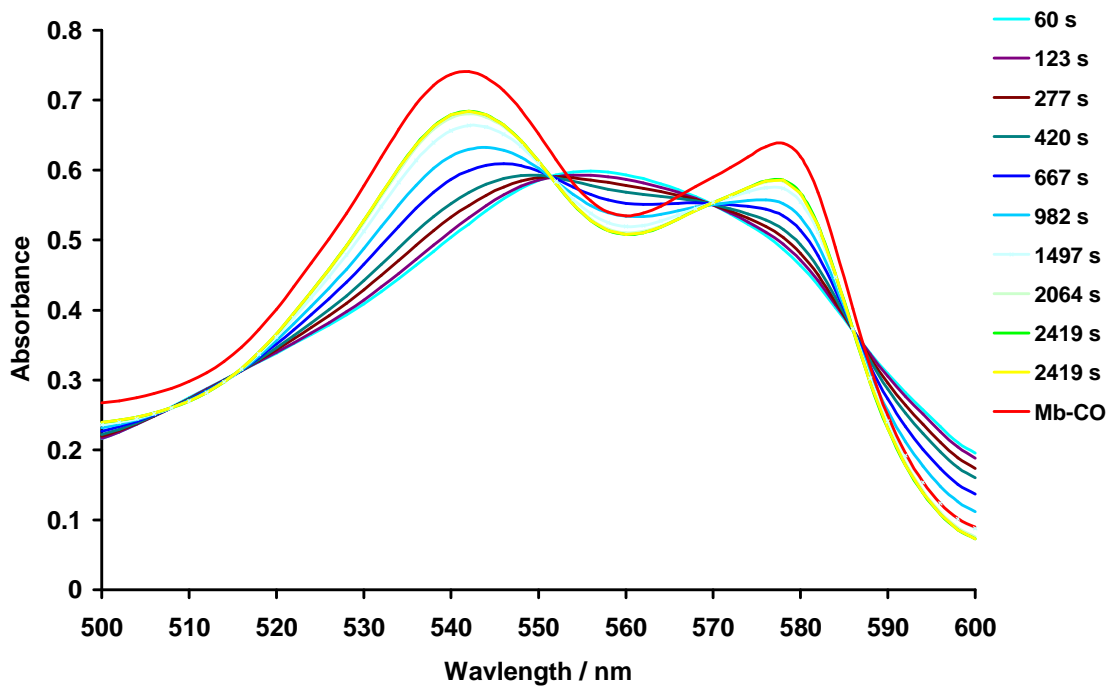

**Fig. 5.** The changes in the UV spectrum of myoglobin as CO is released from  $MnBr(CO)_5$  ( $60\mu M$ ).

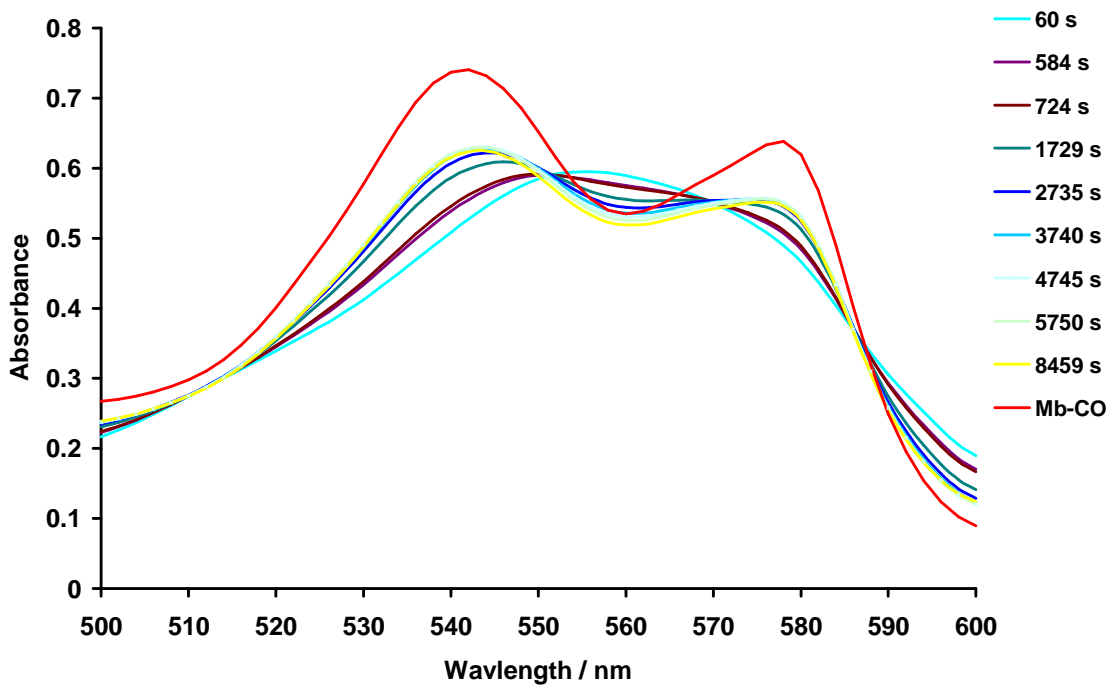

**Fig. 6.** The changes in the UV spectrum of myoglobin as CO is released from  $MnBr(CO)_5$  ( $40\mu M$ ).

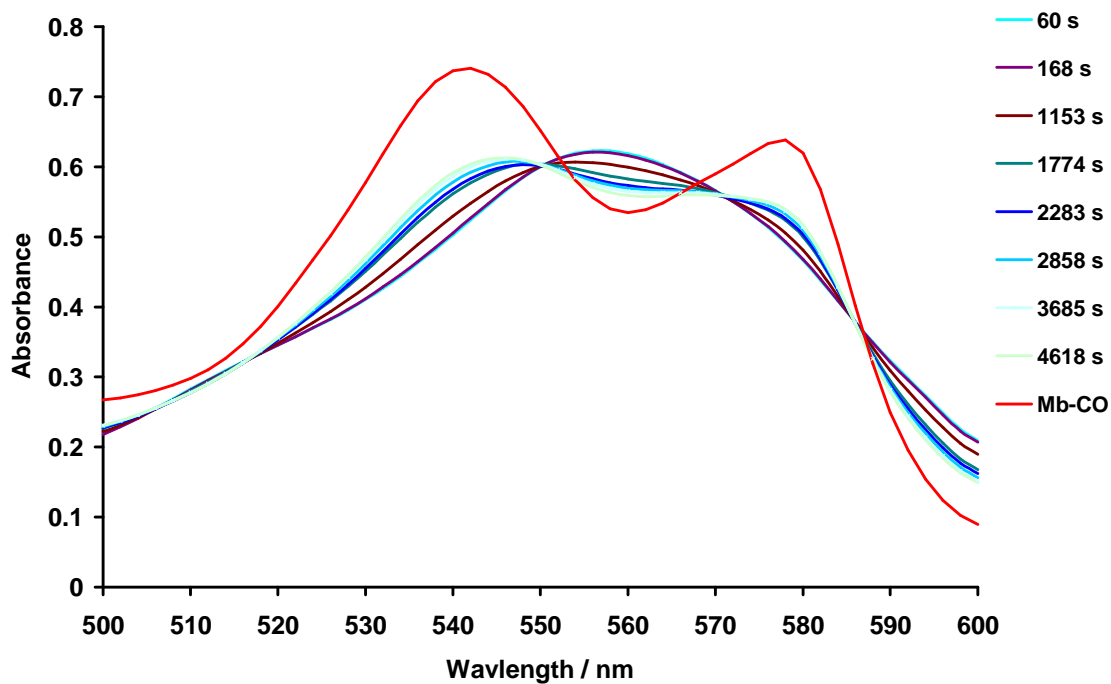

**Fig. 7.** The changes in the UV spectrum of myoglobin as CO is released from  $\text{MnBr}(\text{CO})_5$  ( $20\mu\text{m}$ ).

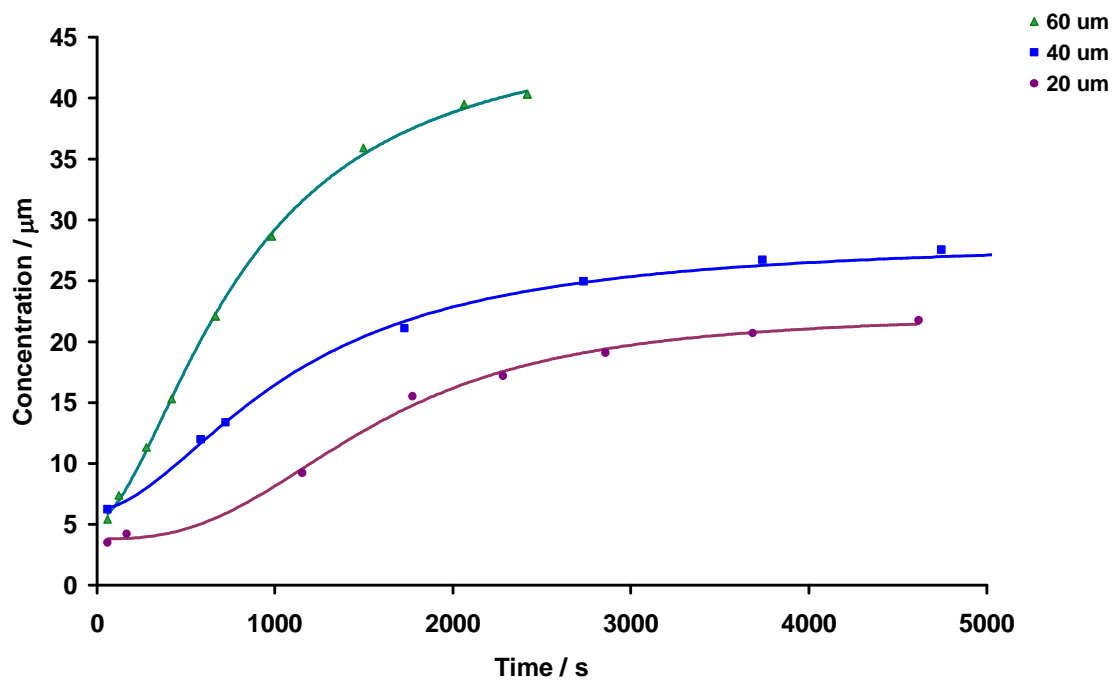

**Fig. 8.** Formation of MbCO over time after addition of 60  $\mu\text{M}$ , 40  $\mu\text{M}$  and 20  $\mu\text{M}$  of  $[\text{Mn}(\text{CO})_5\text{Br}]$  in DMSO to an aqueous solution containing deoxy-myoglobin at pH 7.4.

### 1.3. $FeI_2(CO)_4$

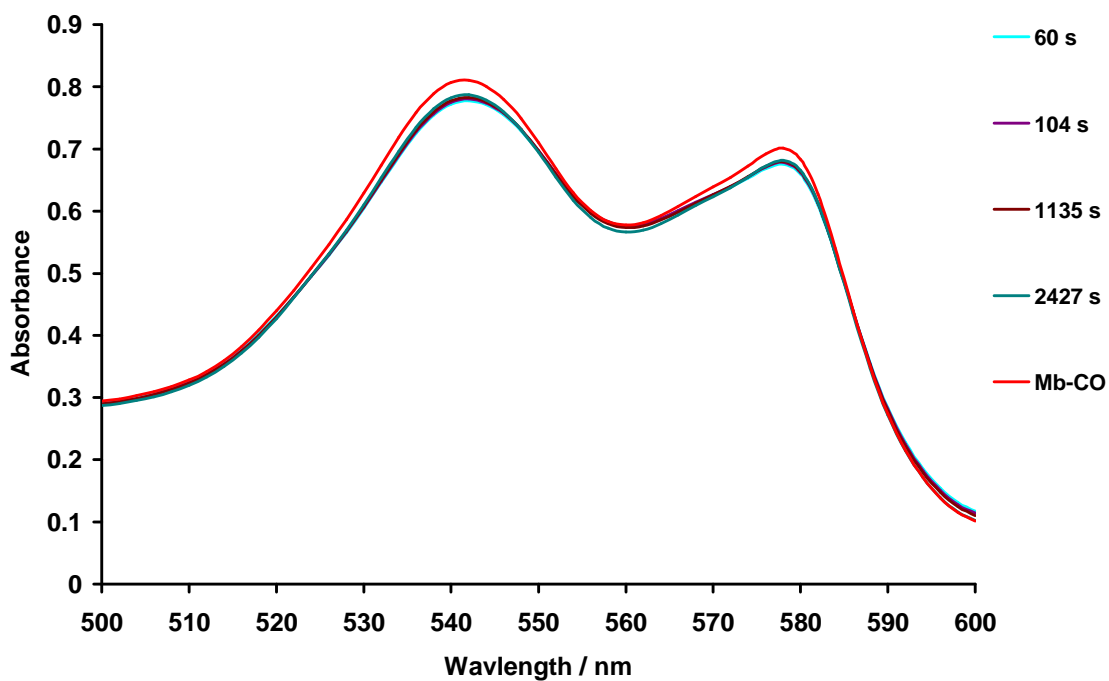

**Fig. 9.** The changes in the UV spectrum of myoglobin as CO is released from  $FeI_2(CO)_5$  ( $60 \mu m$ ).

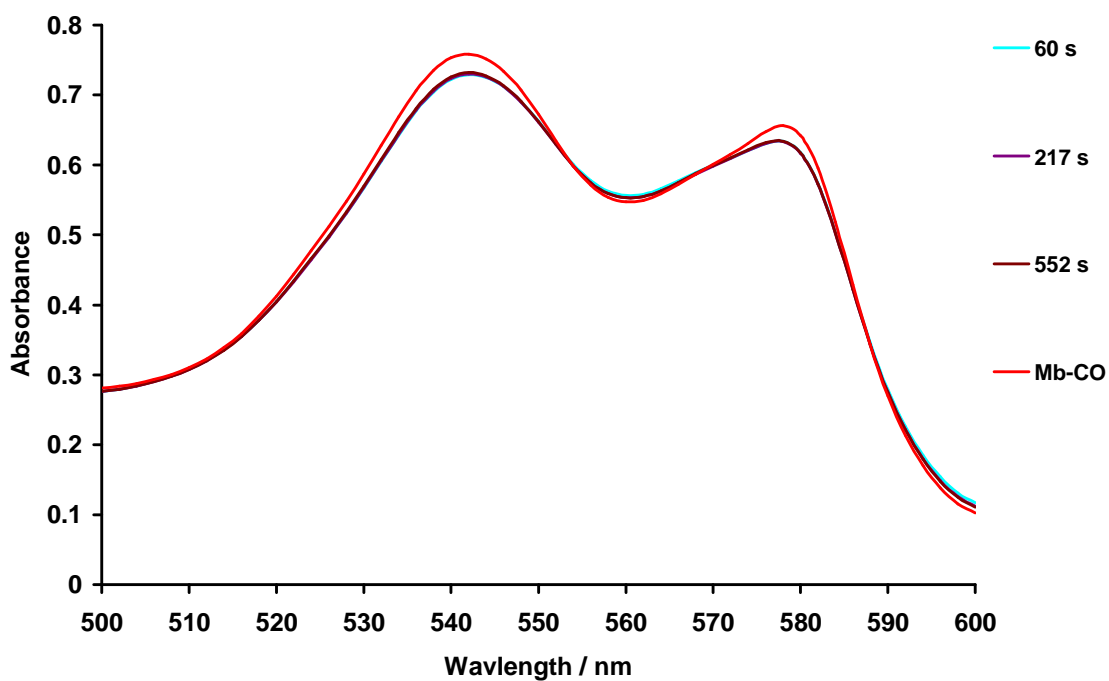

**Fig. 10.** The changes in the UV spectrum of myoglobin as CO is released from  $FeI_2(CO)_5$  ( $40 \mu m$ ).

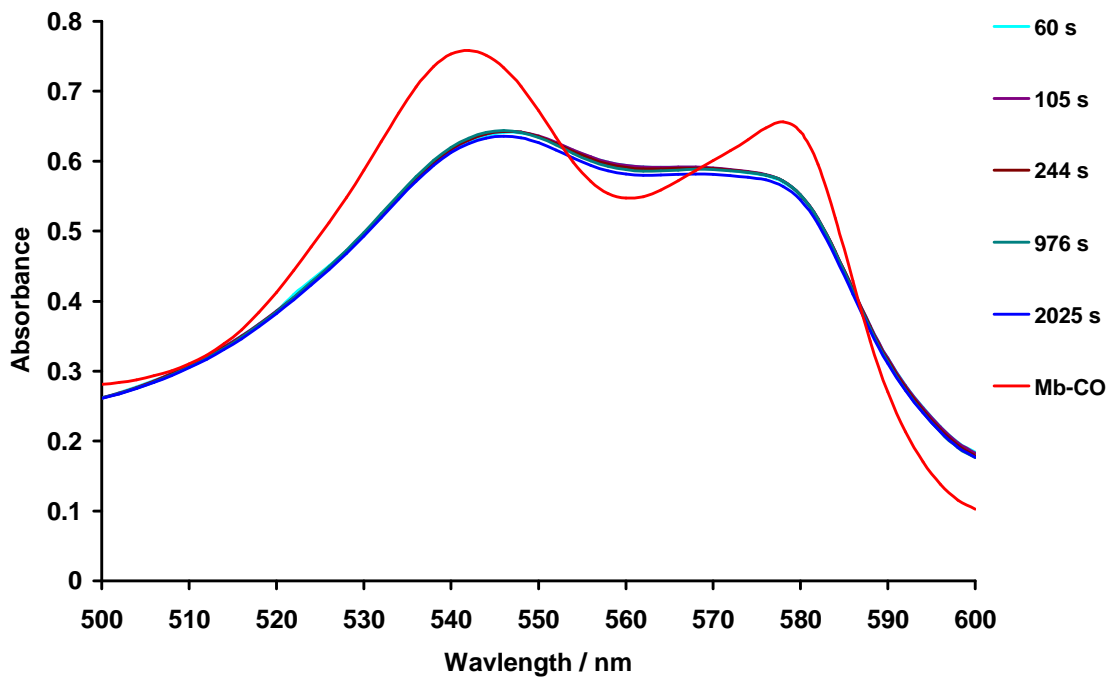

Fig. 11. The changes in the UV spectrum of myoglobin as CO is released from  $\text{FeI}_2(\text{CO})_5$  ( $20\mu\text{m}$ ).

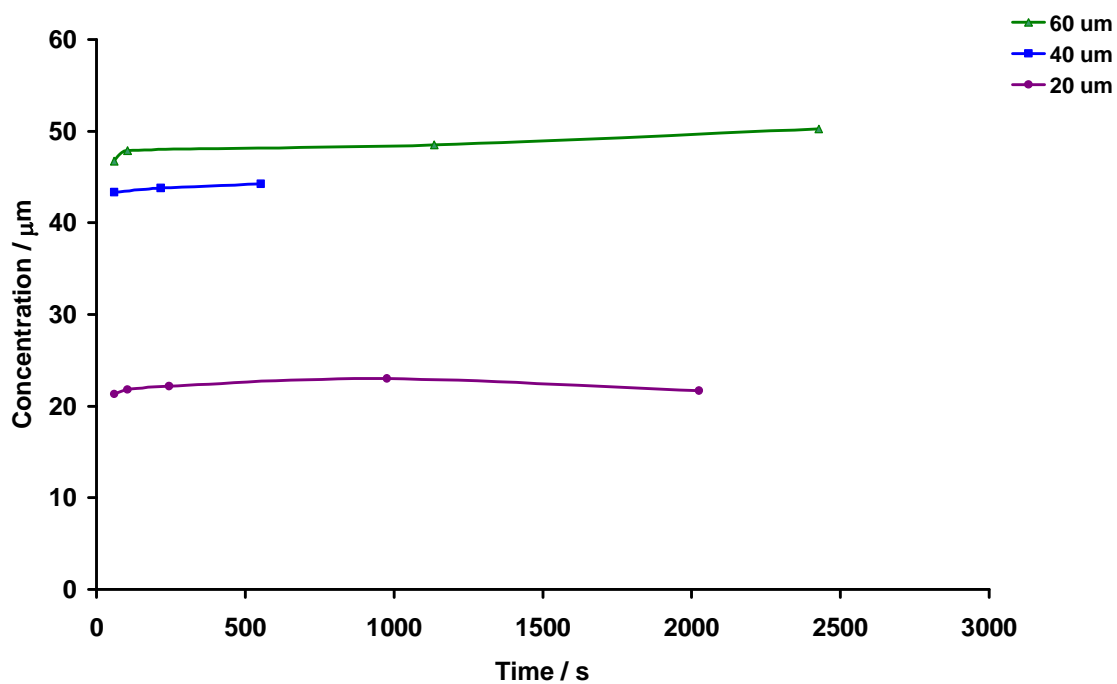

Fig. 12. Formation of MbCO over time after addition of  $60\mu\text{M}$ ,  $40\mu\text{M}$  and  $20\mu\text{M}$  of  $\text{FeI}_2(\text{CO})_5$  in EtOH to an aqueous solution containing deoxy-myoglobin at pH 7.4.



#### 1.4. *mer*-FeI<sub>2</sub>(CO)<sub>3</sub>(P{OCH<sub>3</sub>})<sub>3</sub>

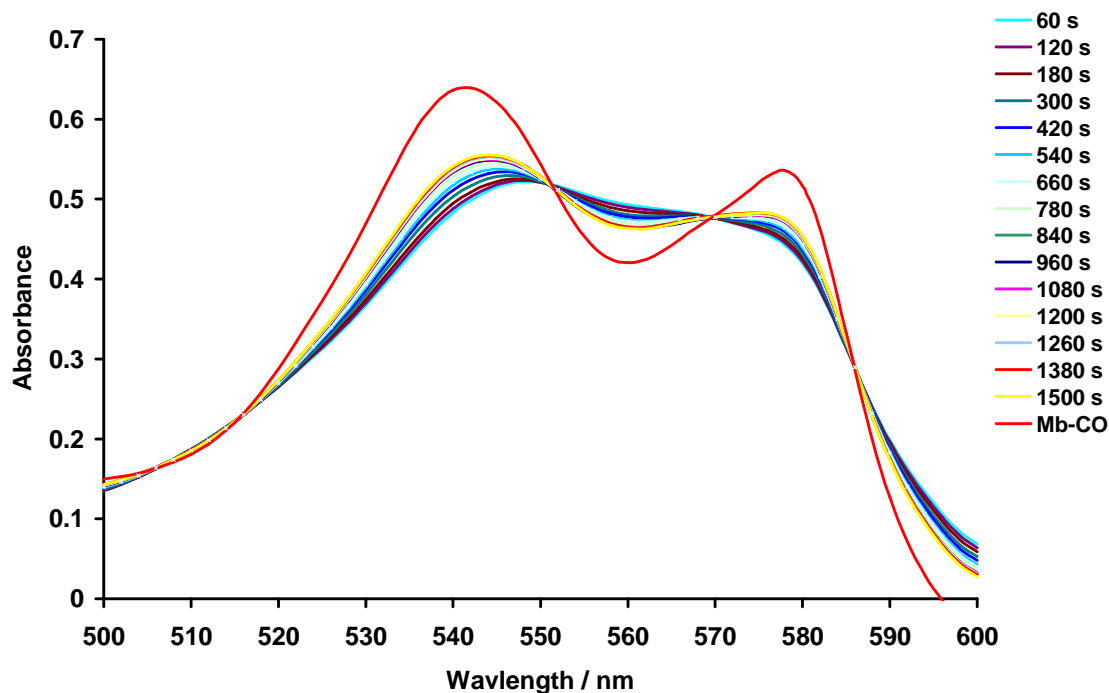

**Fig. 13.** The changes in the UV spectrum of myoglobin as CO is released from *mer*-FeI<sub>2</sub>(CO)<sub>3</sub>(P{OCH<sub>3</sub>})<sub>3</sub> (60 μm).

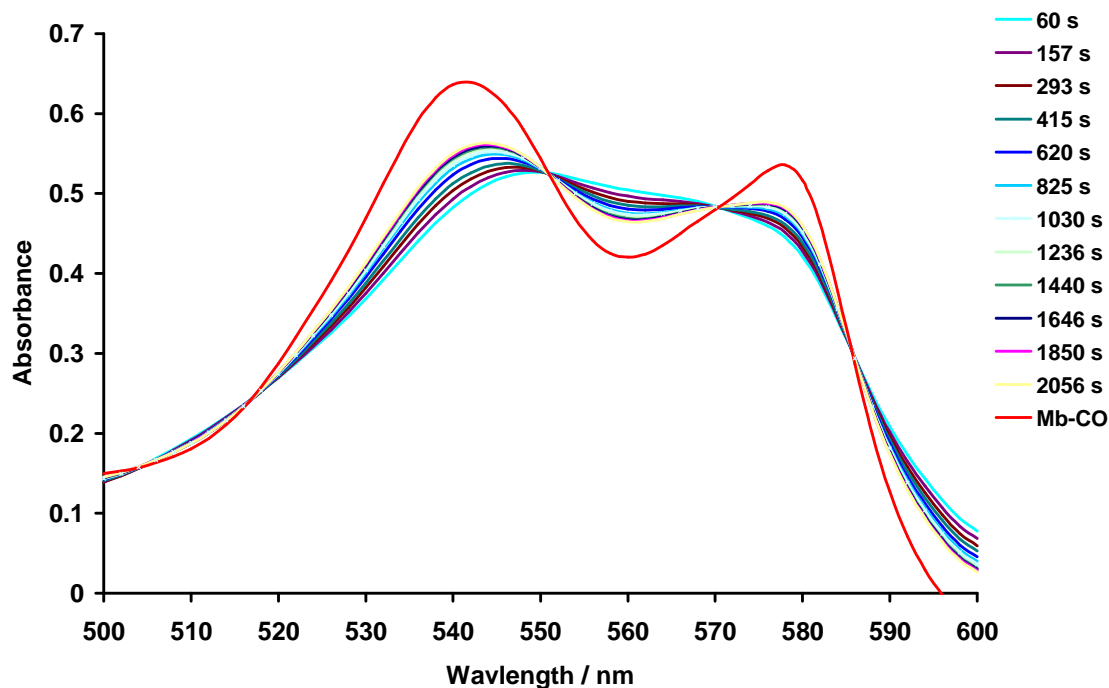

**Fig. 14.** The changes in the UV spectrum of myoglobin as CO is released from *mer*-FeI<sub>2</sub>(CO)<sub>3</sub>(P{OCH<sub>3</sub>})<sub>3</sub> (40 μm).

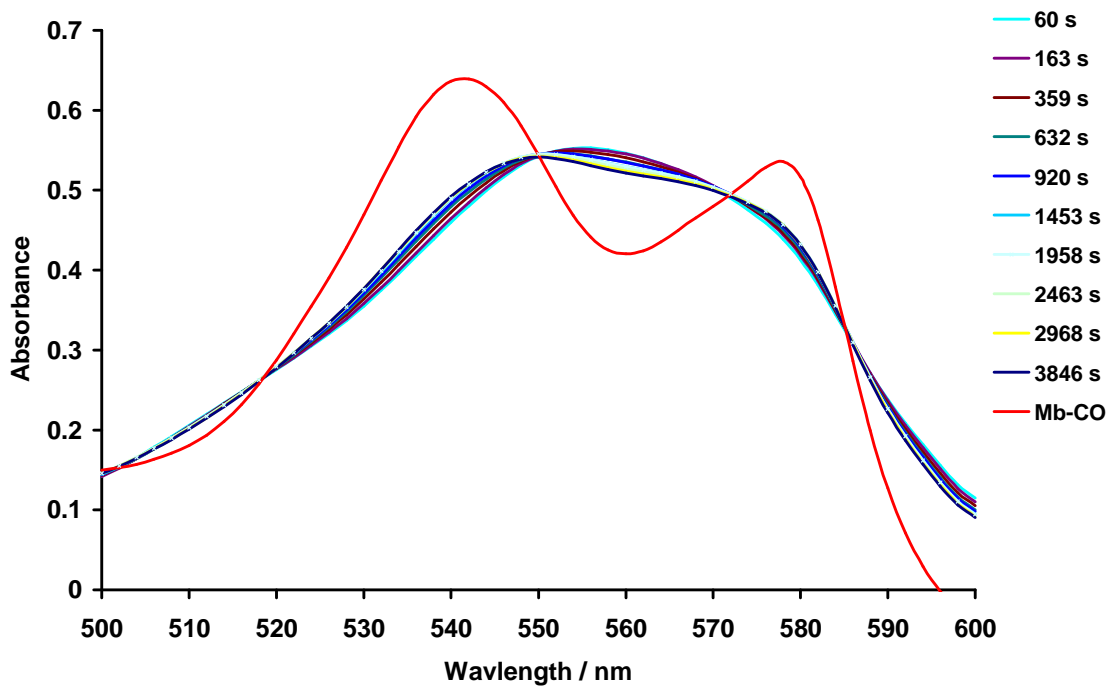

**Fig. 15.** The changes in the UV spectrum of myoglobin as CO is released from *mer*-FeI<sub>2</sub>(CO)<sub>3</sub>(P{OCH<sub>3</sub>}<sub>3</sub>)<sub>3</sub> (20 μm).

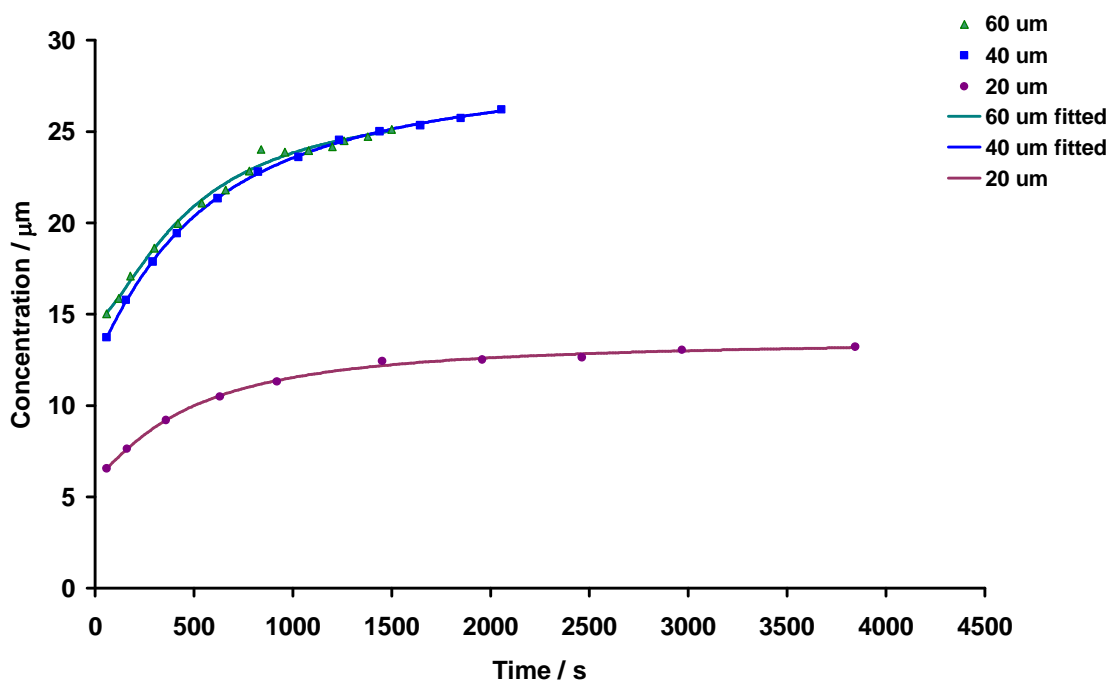

**Fig. 16.** Formation of MbCO over time after addition of 60 μM, 40 μM and 20 μM of *mer*-FeI<sub>2</sub>(CO)<sub>3</sub>(P{OCH<sub>3</sub>}<sub>3</sub>)<sub>3</sub> in DMSO to an aqueous solution containing deoxy-myoglobin at pH 7.4.

### 1.5. *mer*-FeI<sub>2</sub>(CO)<sub>3</sub>(P{CH<sub>2</sub>OH}<sub>3</sub>)

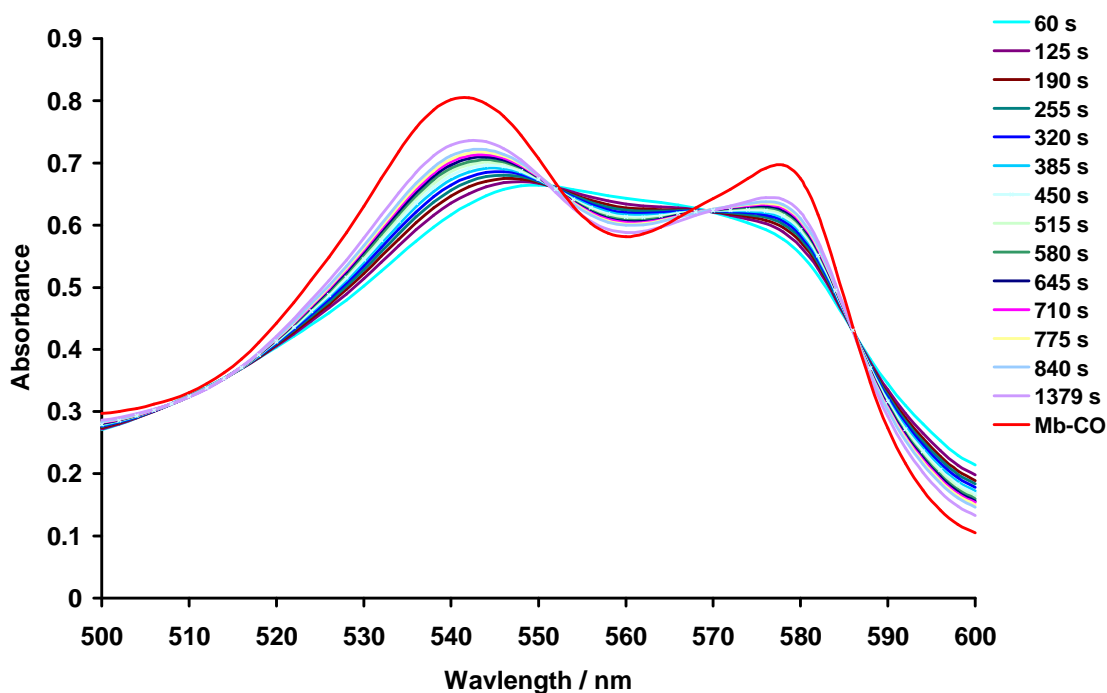

**Fig. 17.** The changes in the UV spectrum of myoglobin as CO is released from *mer*-FeI<sub>2</sub>(CO)<sub>3</sub>(P{CH<sub>2</sub>OH}<sub>3</sub>) (60 μm).

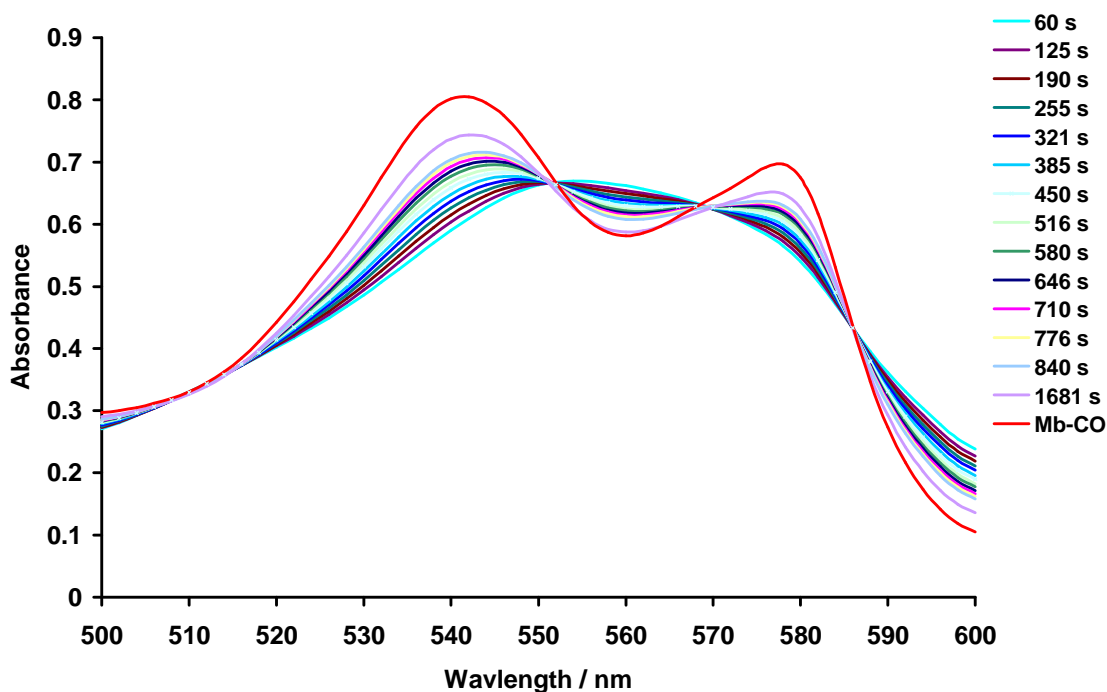

**Fig. 18.** The changes in the UV spectrum of myoglobin as CO is released from *mer*-FeI<sub>2</sub>(CO)<sub>3</sub>(P{CH<sub>2</sub>OH}<sub>3</sub>) (40 μm).

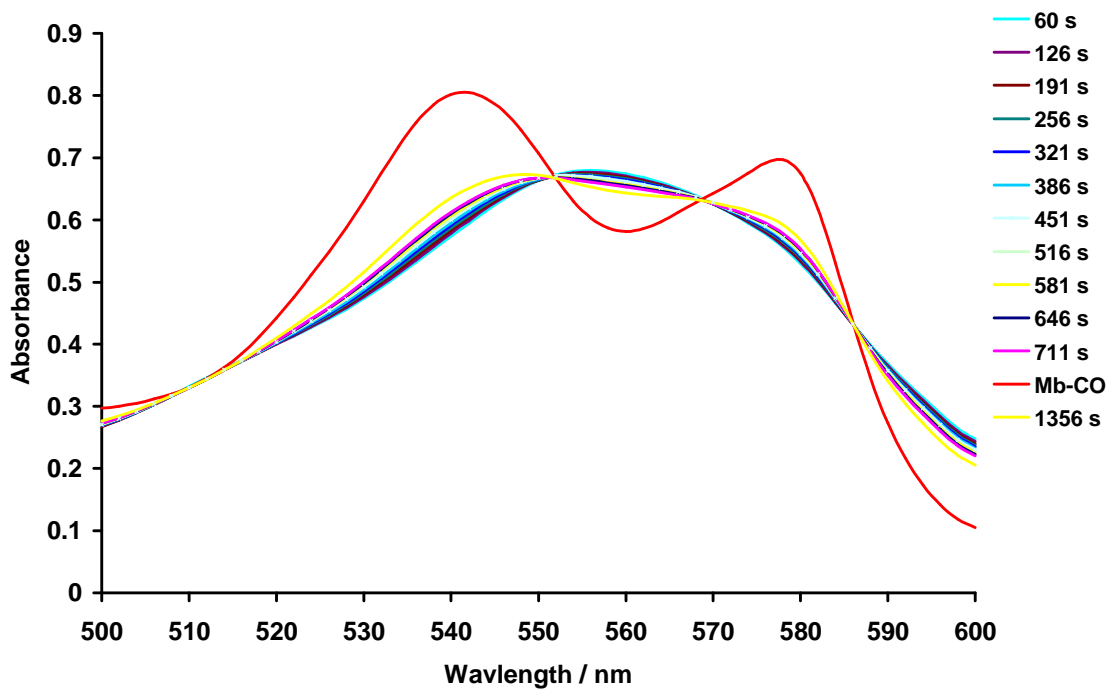

**Fig. 19.** The changes in the UV spectrum of myoglobin as CO is released from *mer*-FeI<sub>2</sub>(CO)<sub>3</sub>(P{CH<sub>2</sub>OH}<sub>3</sub>) (20 μm).

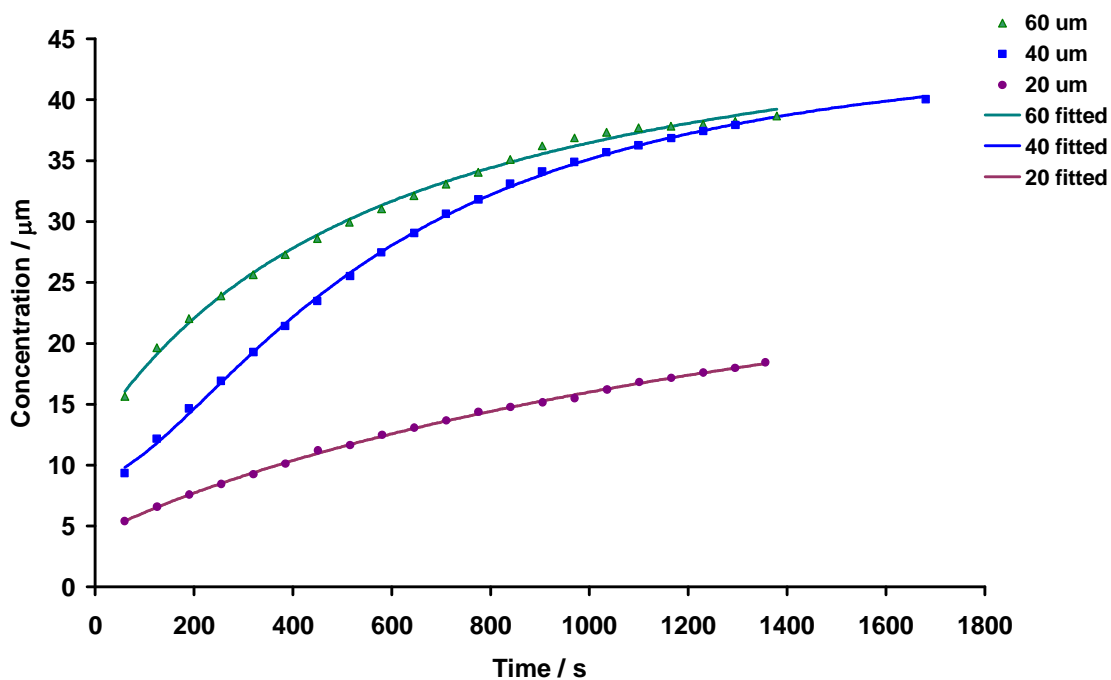

**Fig. 20.** Formation of MbCO over time after addition of 60 μM, 40 μM and 20 μM of *mer*-FeI<sub>2</sub>(CO)<sub>3</sub>(P{CH<sub>2</sub>OH}<sub>3</sub>) in DMSO to an aqueous solution containing deoxy-myoglobin at pH 7.4.

### 1.6. *all cis*-FeI<sub>2</sub>(CO)<sub>2</sub>(P{OCH<sub>3</sub>}<sub>3</sub>)<sub>2</sub>

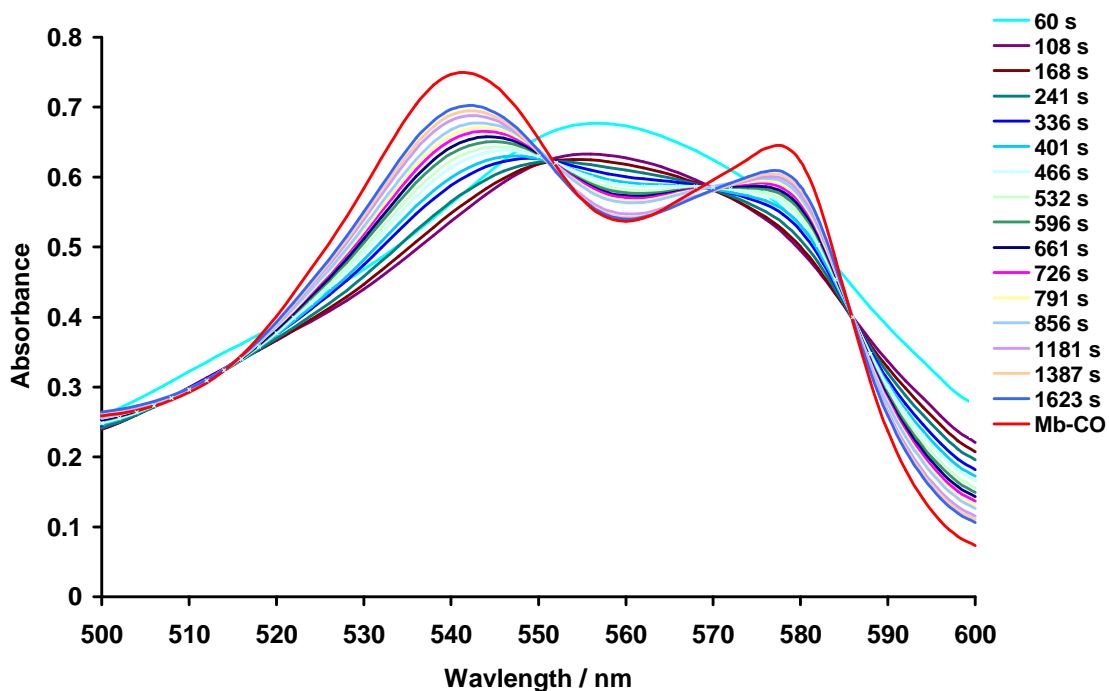

**Fig. 21.** The changes in the UV spectrum of myoglobin as CO is released from *all cis*-FeI<sub>2</sub>(CO)<sub>2</sub>(P{OCH<sub>3</sub>}<sub>3</sub>)<sub>2</sub> (60 μm).

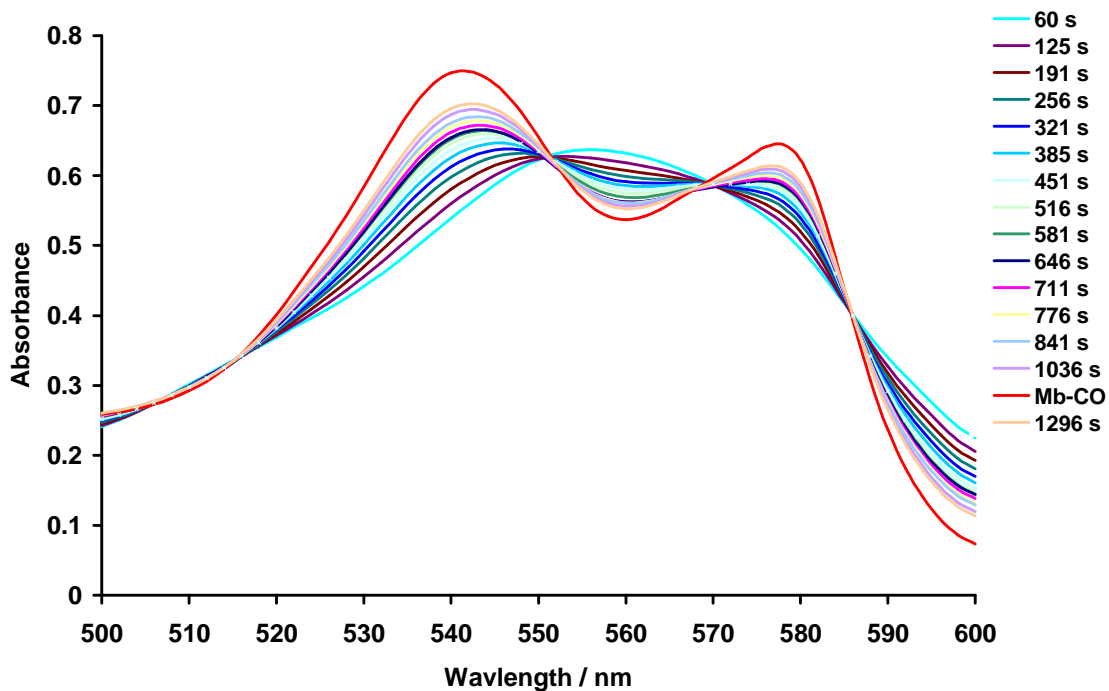

**Fig. 22.** The changes in the UV spectrum of myoglobin as CO is released from *all cis*-FeI<sub>2</sub>(CO)<sub>2</sub>(P{OCH<sub>3</sub>}<sub>3</sub>)<sub>2</sub> (40 μm).

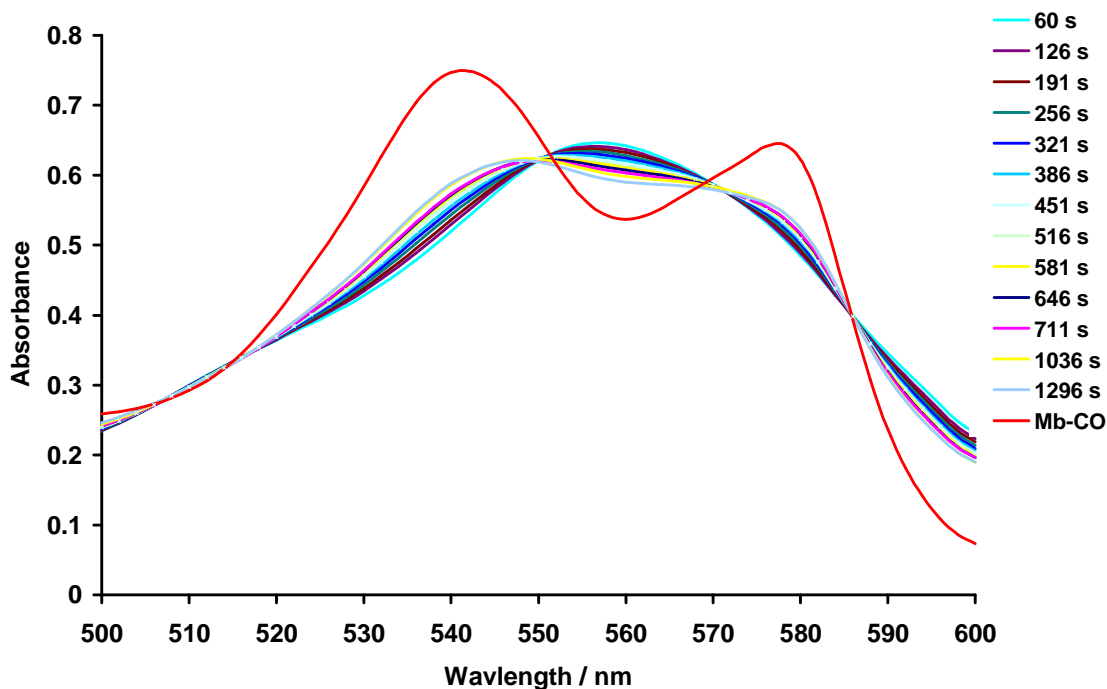

**Fig. 23.** The changes in the UV spectrum of myoglobin as CO is released from *all cis*-FeI<sub>2</sub>(CO)<sub>2</sub>(P{OCH<sub>3</sub>}<sub>2</sub>)<sub>2</sub> (20 μM).

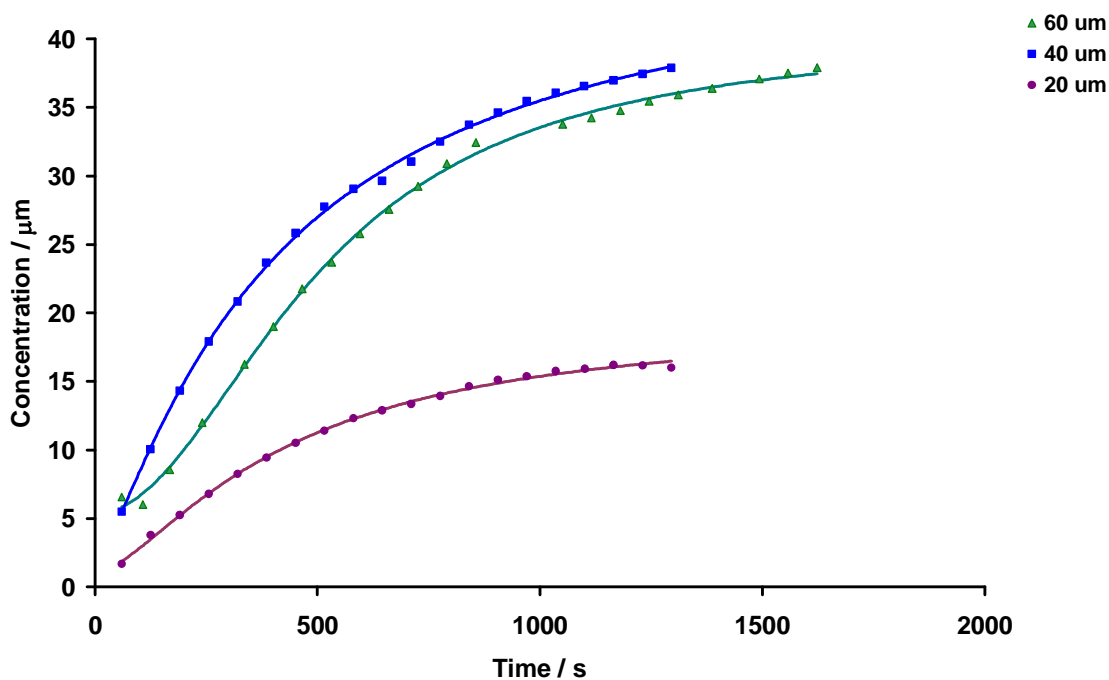

**Fig. 24.** Formation of MbCO over time after addition of 60 μM, 40 μM and 20 μM of *all cis*-FeI<sub>2</sub>(CO)<sub>2</sub>(P{OCH<sub>3</sub>}<sub>2</sub>)<sub>2</sub> in DMSO to an aqueous solution containing deoxy-myoglobin at pH 7.4.

### 1.7. *cis,cis,trans*-FeI<sub>2</sub>(CO)<sub>2</sub>(P{OCH<sub>3</sub>})<sub>3</sub>)<sub>2</sub>

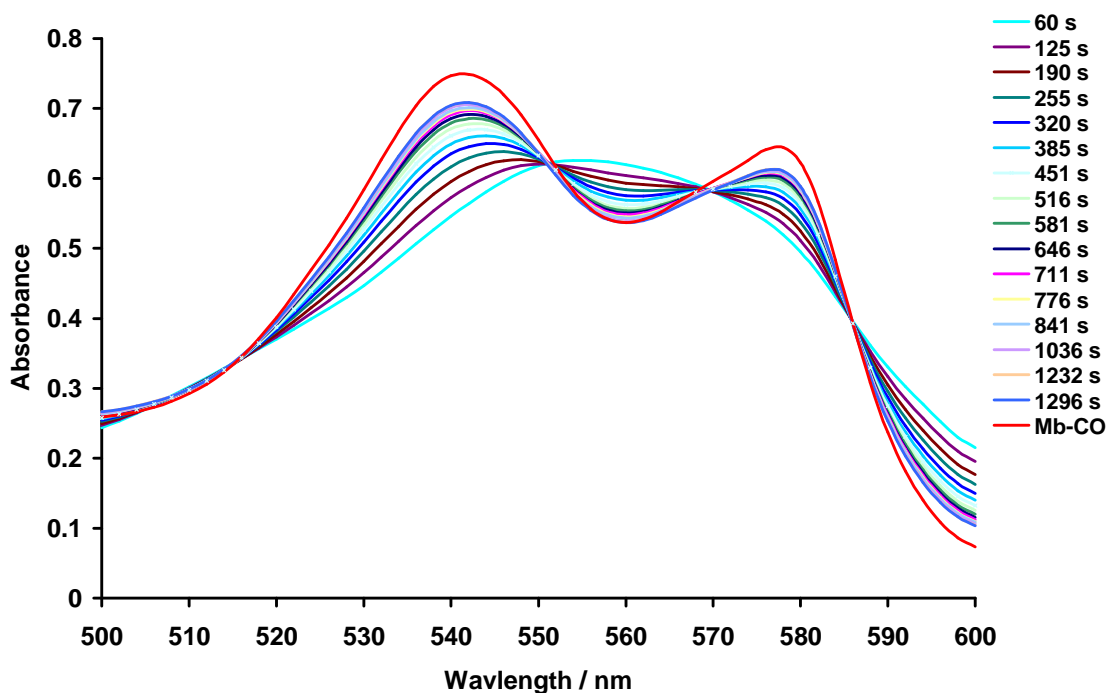

**Fig. 25.** The changes in the UV spectrum of myoglobin as CO is released from *cis,cis,trans*-FeI<sub>2</sub>(CO)<sub>2</sub>(P{OCH<sub>3</sub>}) (60 μm).

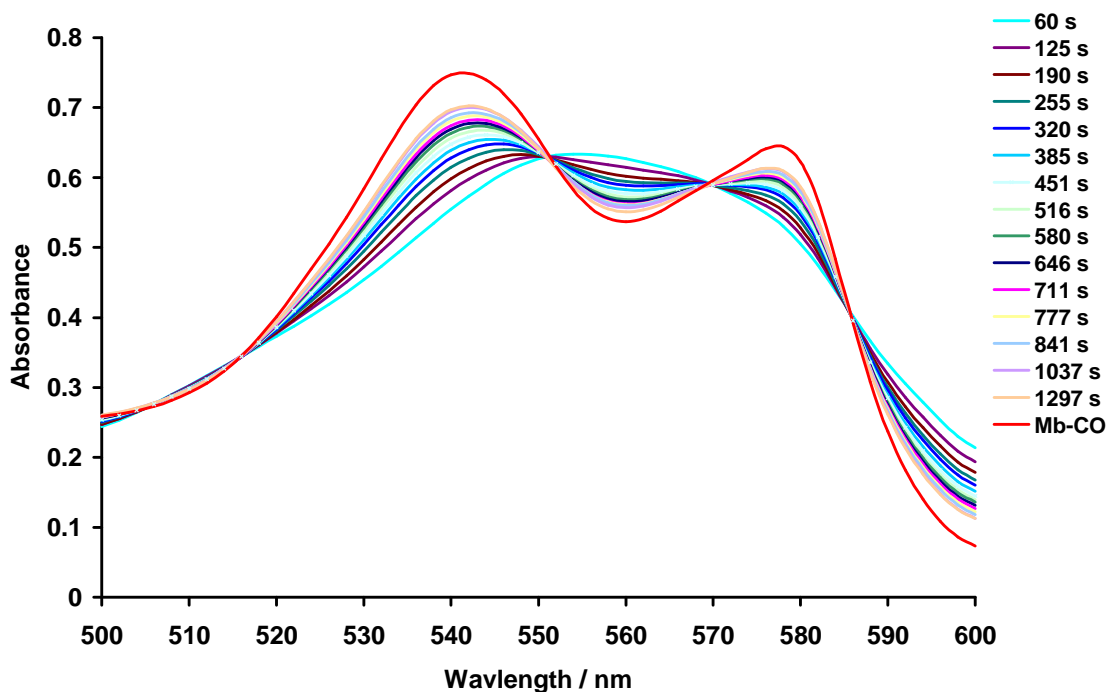

**Fig. 26.** The changes in the UV spectrum of myoglobin as CO is released from *cis,cis,trans*-FeI<sub>2</sub>(CO)<sub>2</sub>(P{OCH<sub>3</sub>}) (40 μm).

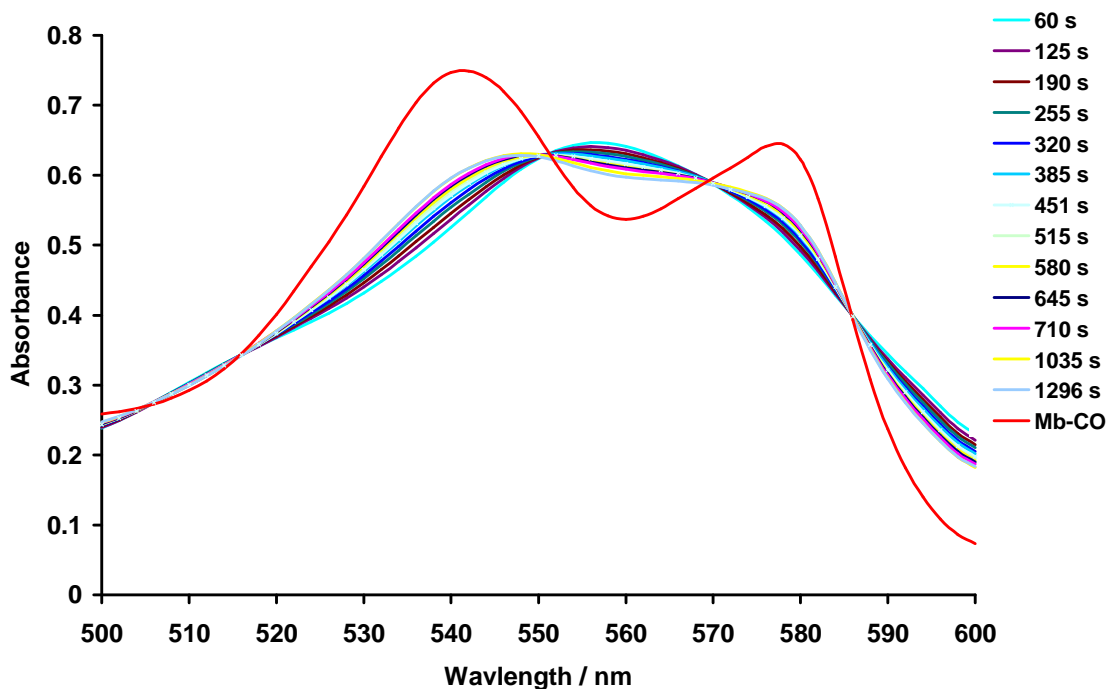

**Fig. 27.** The changes in the UV spectrum of myoglobin as CO is released from *cis,cis,trans*- $\text{FeI}_2(\text{CO})_2(\text{P}\{\text{OCH}_3\})_2$  ( $20\mu\text{m}$ ).

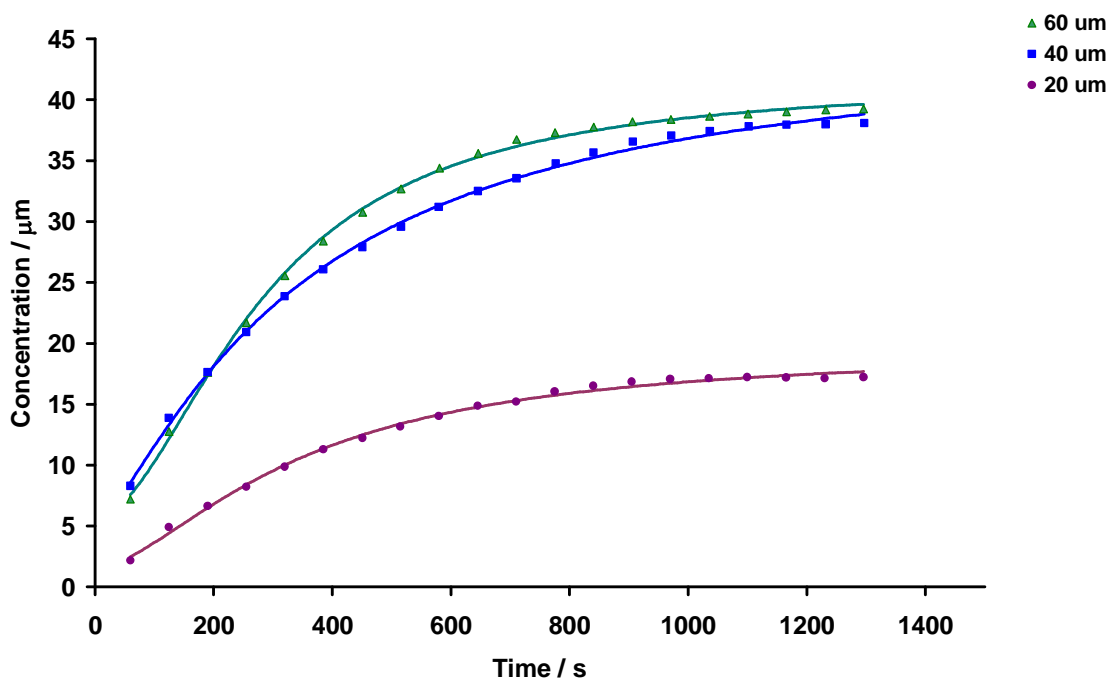

**Fig. 28.** Formation of MbCO over time after addition of 60  $\mu\text{M}$ , 40  $\mu\text{M}$  and 20  $\mu\text{M}$  of *cis,cis,trans*- $\text{FeI}_2(\text{CO})_2(\text{P}\{\text{OCH}_3\})_2$  in DMSO to an aqueous solution containing deoxy-myoglobin at pH 7.4.



## 1.8. Comparison of CO-release Data for Iron Phosphine Complexes

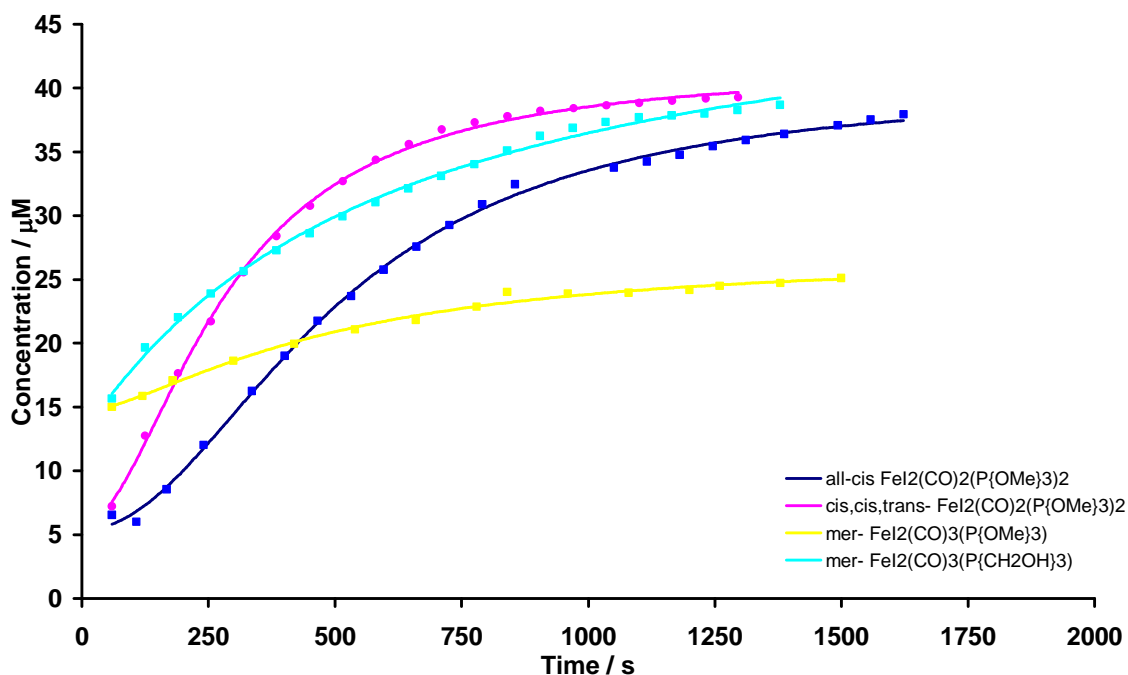

**Fig. 29.** Formation of MbCO over time after addition of 60  $\mu\text{M}$  solutions of *mer*- $\text{FeI}_2(\text{CO})_3(\text{P}(\text{OCH}_3))$ , *mer*- $\text{FeI}_2(\text{CO})_3(\text{P}(\text{CH}_2\text{OH}))$ , *cis,cis,trans*- $\text{FeI}_2(\text{CO})_2(\text{P}(\text{OCH}_3))_2$  and *all-cis*- $\text{FeI}_2(\text{CO})_2(\text{P}(\text{OCH}_3))_2$  in DMSO to an aqueous solution containing deoxy-myoglobin at pH 7.4.

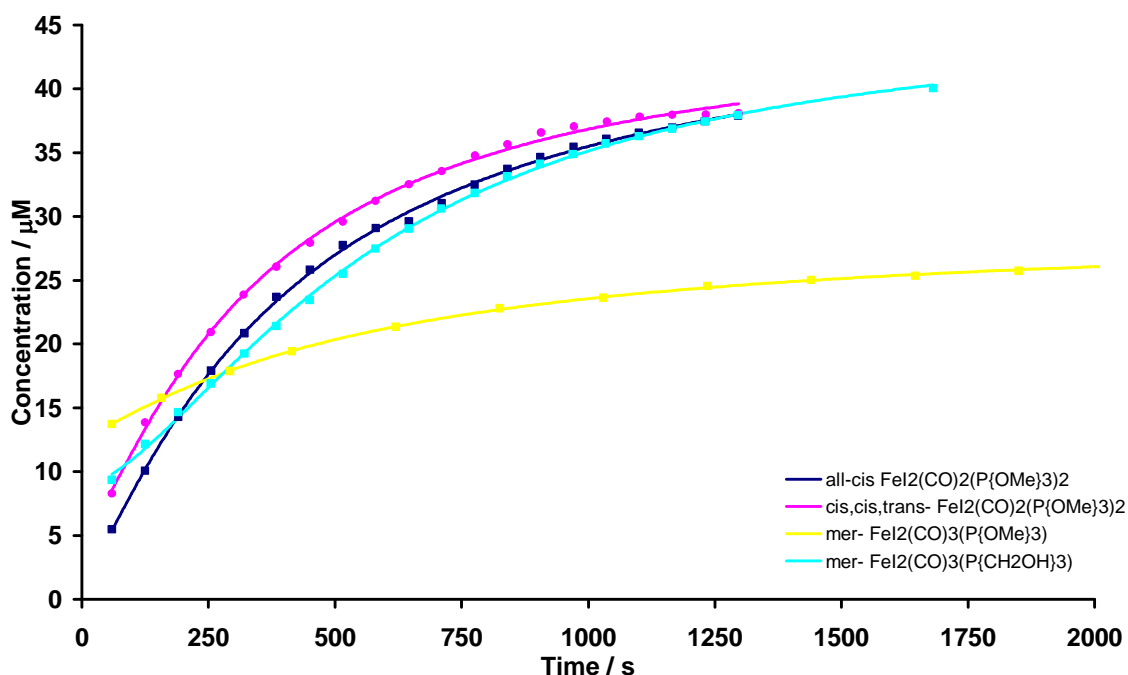

**Fig. 30.** Formation of MbCO over time after addition of 40  $\mu\text{M}$  solutions of *mer*- $\text{FeI}_2(\text{CO})_3(\text{P}(\text{OCH}_3))$ , *mer*- $\text{FeI}_2(\text{CO})_3(\text{P}(\text{CH}_2\text{OH}))$ , *cis,cis,trans*- $\text{FeI}_2(\text{CO})_2(\text{P}(\text{OCH}_3))_2$  and *all-cis*- $\text{FeI}_2(\text{CO})_2(\text{P}(\text{OCH}_3))_2$  in DMSO to an aqueous solution containing deoxy-myoglobin at pH 7.4.

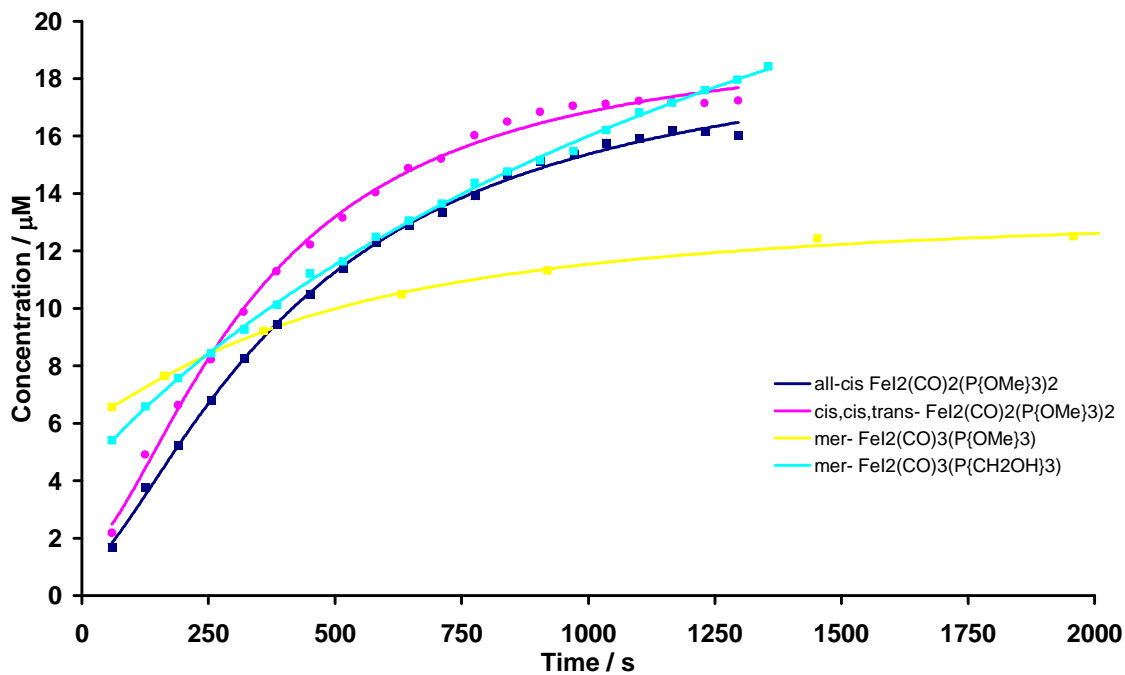

**Fig. 31.** Formation of MbCO over time after addition of 20 μM solutions of *mer*-FeI<sub>2</sub>(CO)<sub>3</sub>(P{OCH<sub>3</sub>}<sub>3</sub>), *mer*-FeI<sub>2</sub>(CO)<sub>3</sub>(P{CH<sub>2</sub>OH})<sub>3</sub>, *cis,cis,trans*-FeI<sub>2</sub>(CO)<sub>2</sub>(P{OCH<sub>3</sub>}<sub>3</sub>)<sub>2</sub> and *all-cis*-FeI<sub>2</sub>(CO)<sub>3</sub>(P{OCH<sub>3</sub>}<sub>3</sub>)<sub>2</sub> in DMSO to an aqueous solution containing deoxy-myoglobin at pH 7.4.

### 1.9. $[\text{NEt}_4][\text{CrCl}(\text{CO})_5]$

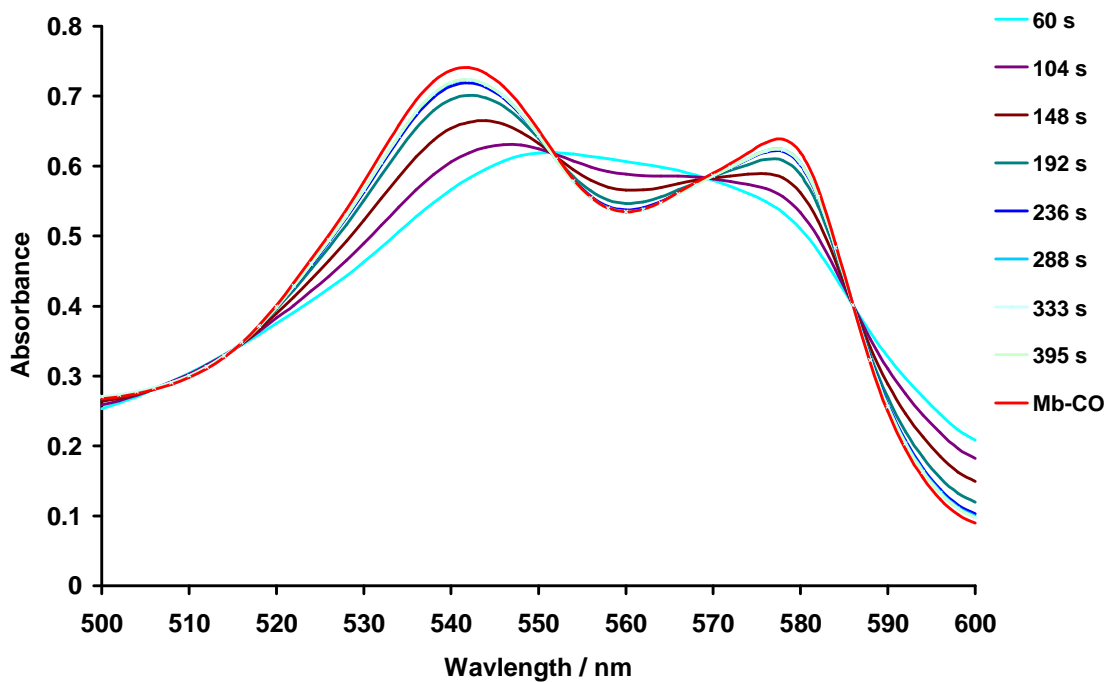

**Fig. 32.** The changes in the UV spectrum of myoglobin as CO is released from  $[\text{NEt}_4][\text{CrCl}(\text{CO})_5]$  (60 μm).

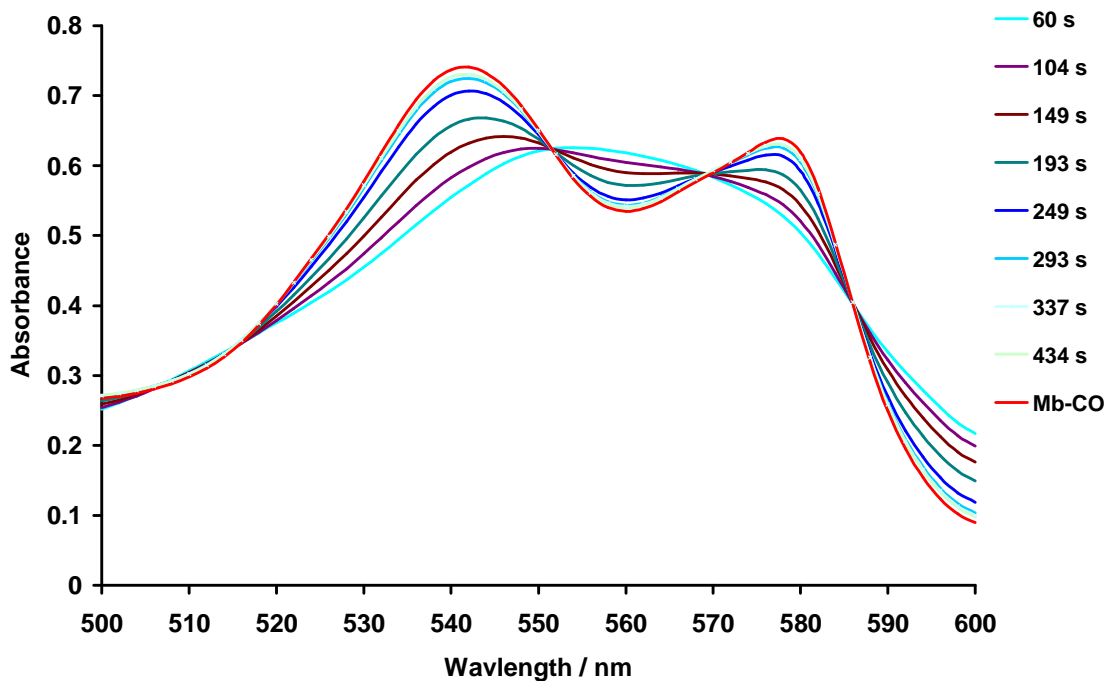

**Fig. 33.** The changes in the UV spectrum of myoglobin as CO is released from  $[\text{NEt}_4][\text{CrCl}(\text{CO})_5]$  (40 μm).

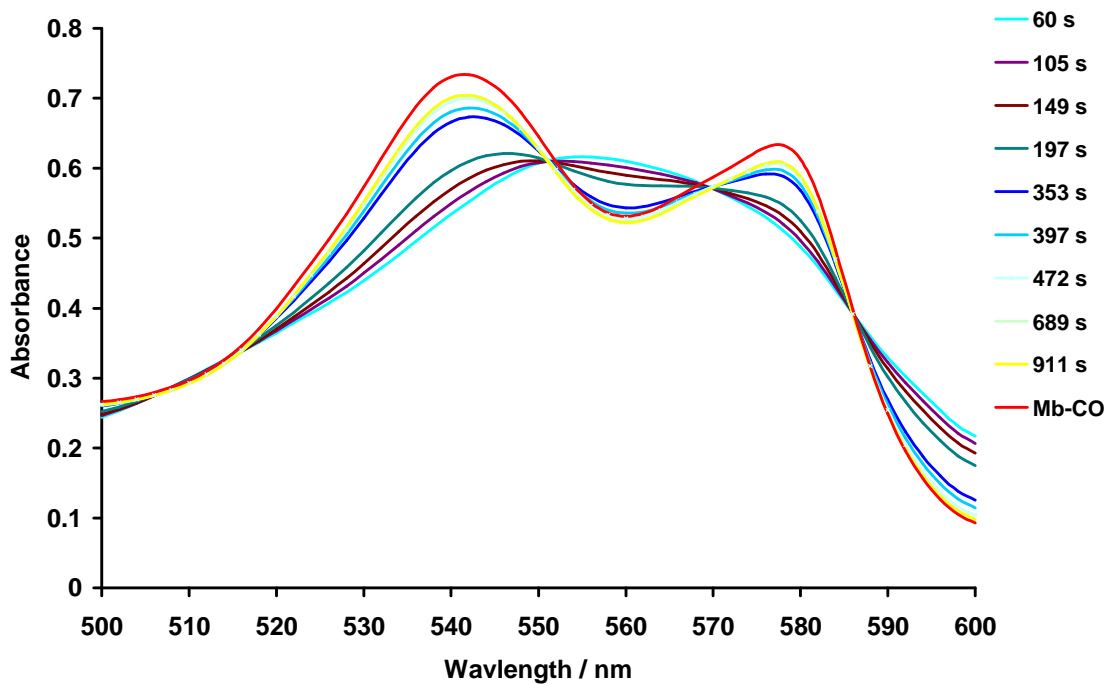

**Fig. 34.** The changes in the UV spectrum of myoglobin as CO is released from  $[\text{NEt}_4][\text{CrCl}(\text{CO})_5]$  ( $20\mu\text{m}$ ).

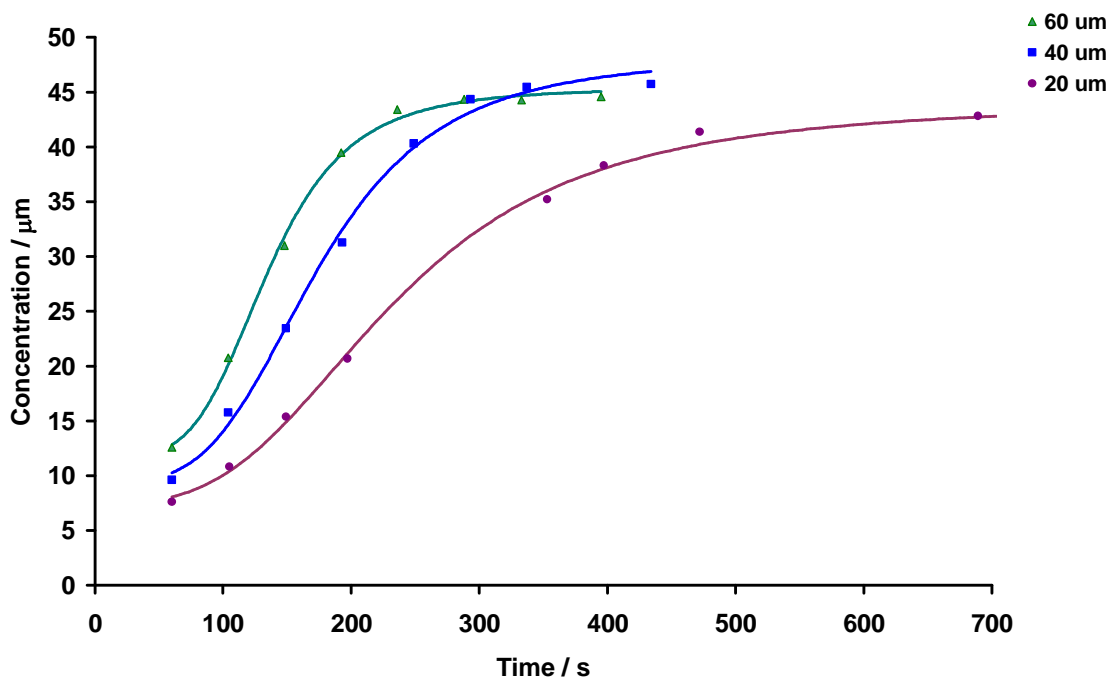

**Fig. 35.** Formation of MbCO over time after addition of  $60\mu\text{M}$ ,  $40\mu\text{M}$  and  $20\mu\text{M}$  of  $[\text{NEt}_4][\text{CrCl}(\text{CO})_5]$  in DMSO to an aqueous solution containing deoxy-myoglobin at pH 7.4.

### 1.10. $[\text{NEt}_4][\text{CrBr}(\text{CO})_5]$

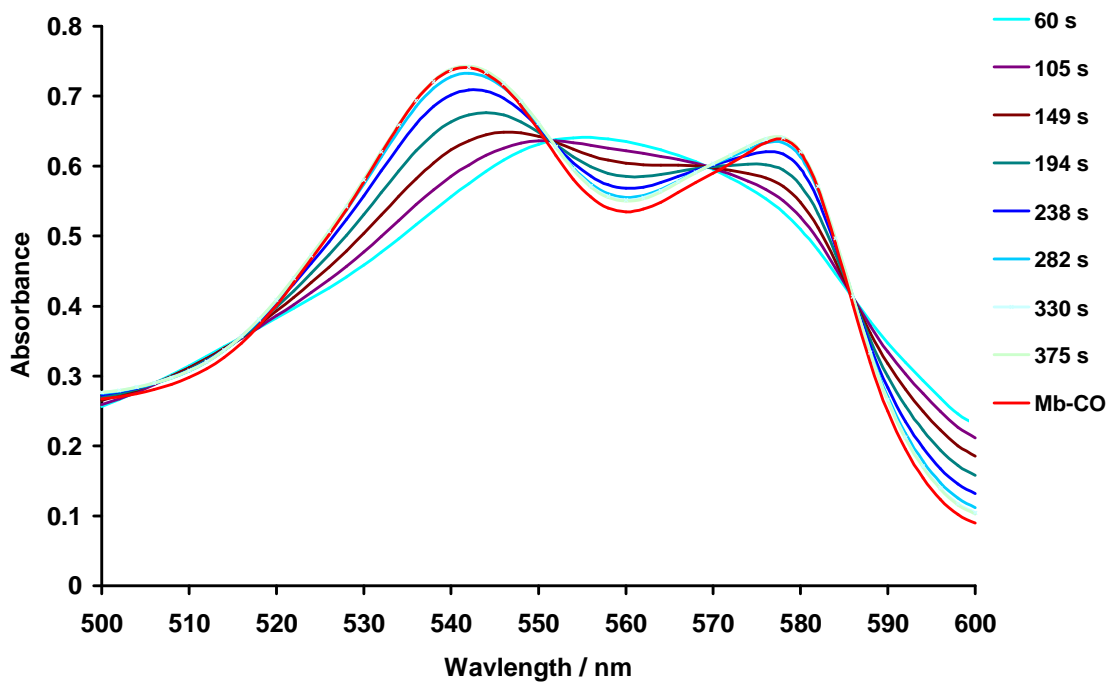

**Fig. 36.** The changes in the UV spectrum of myoglobin as CO is released from  $[\text{NEt}_4][\text{CrBr}(\text{CO})_5]$  ( $60\mu\text{m}$ ).

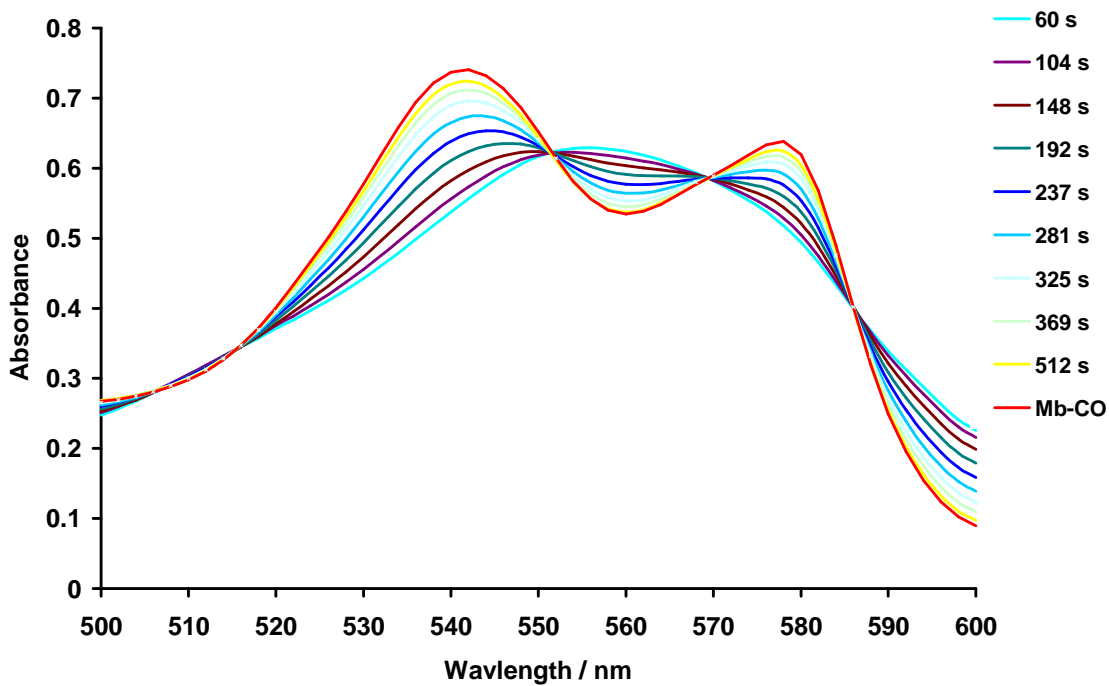

**Fig. 37.** The changes in the UV spectrum of myoglobin as CO is released from  $[\text{NEt}_4][\text{CrBr}(\text{CO})_5]$  ( $40\mu\text{m}$ ).

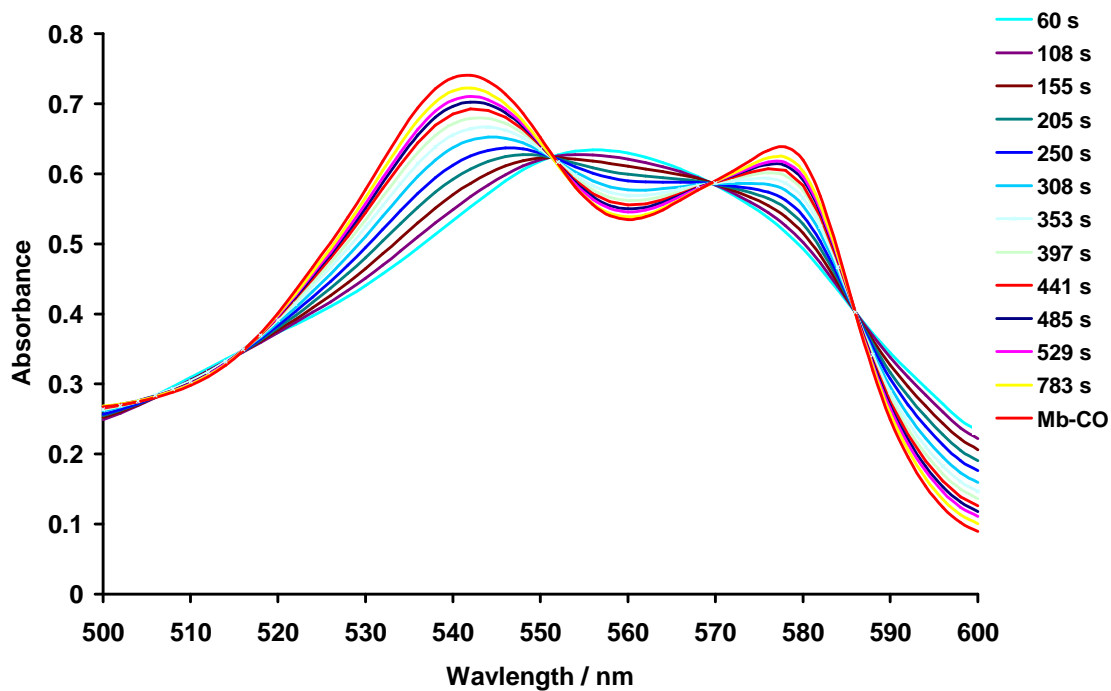

**Fig. 38.** The changes in the UV spectrum of myoglobin as CO is released from  $[\text{NEt}_4][\text{CrBr}(\text{CO})_5]$  ( $20\mu\text{m}$ ).

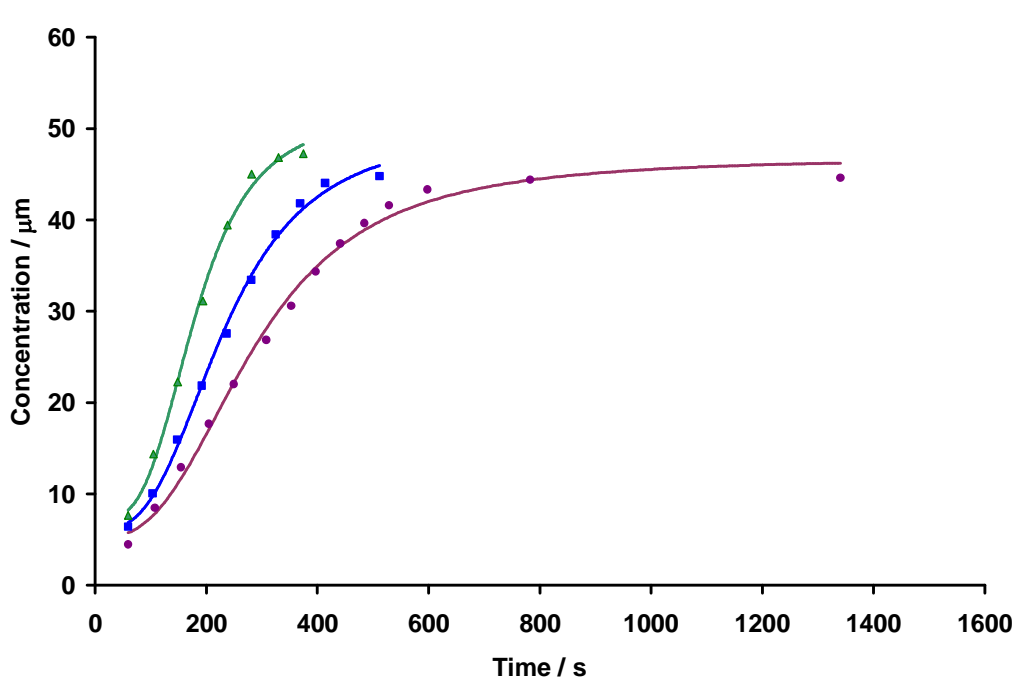

**Fig. 39.** Formation of MbCO over time after addition of  $60\mu\text{M}$ ,  $40\mu\text{M}$  and  $20\mu\text{M}$  of  $[\text{NEt}_4][\text{CrBr}(\text{CO})_5]$  in DMSO to an aqueous solution containing deoxy-myoglobin at pH 7.4.

### 1.11. $[\text{NEt}_4][\text{CrI}(\text{CO})_5]$

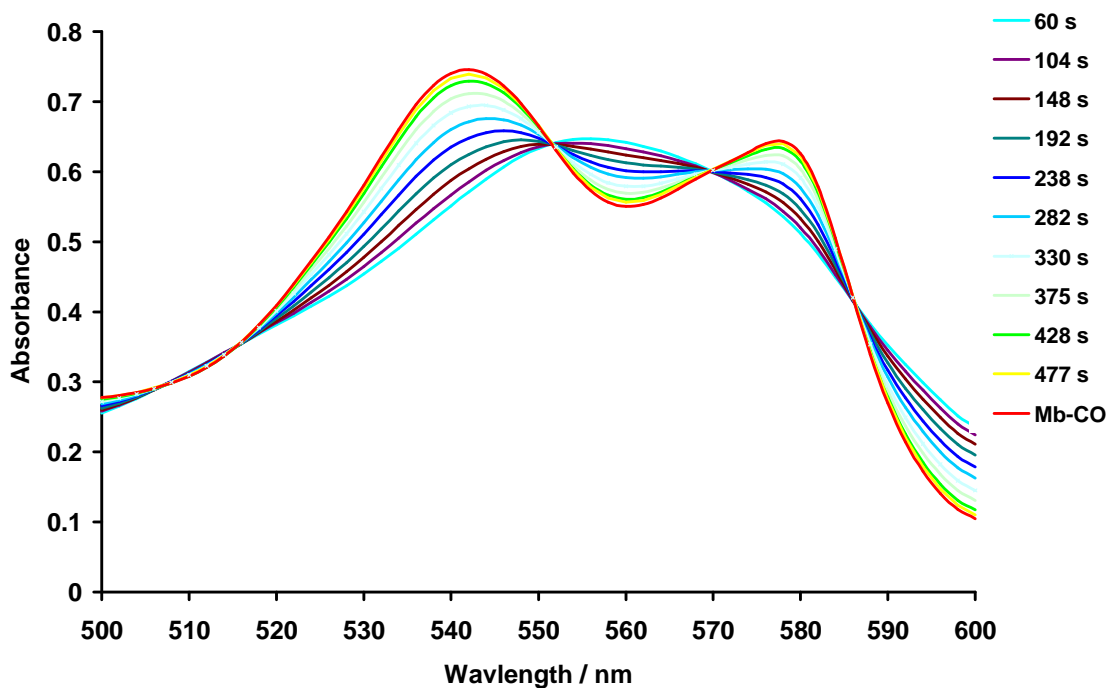

**Fig. 40.** The changes in the UV spectrum of myoglobin as CO is released from  $[\text{NEt}_4][\text{CrI}(\text{CO})_5]$  ( $60\mu\text{m}$ ).

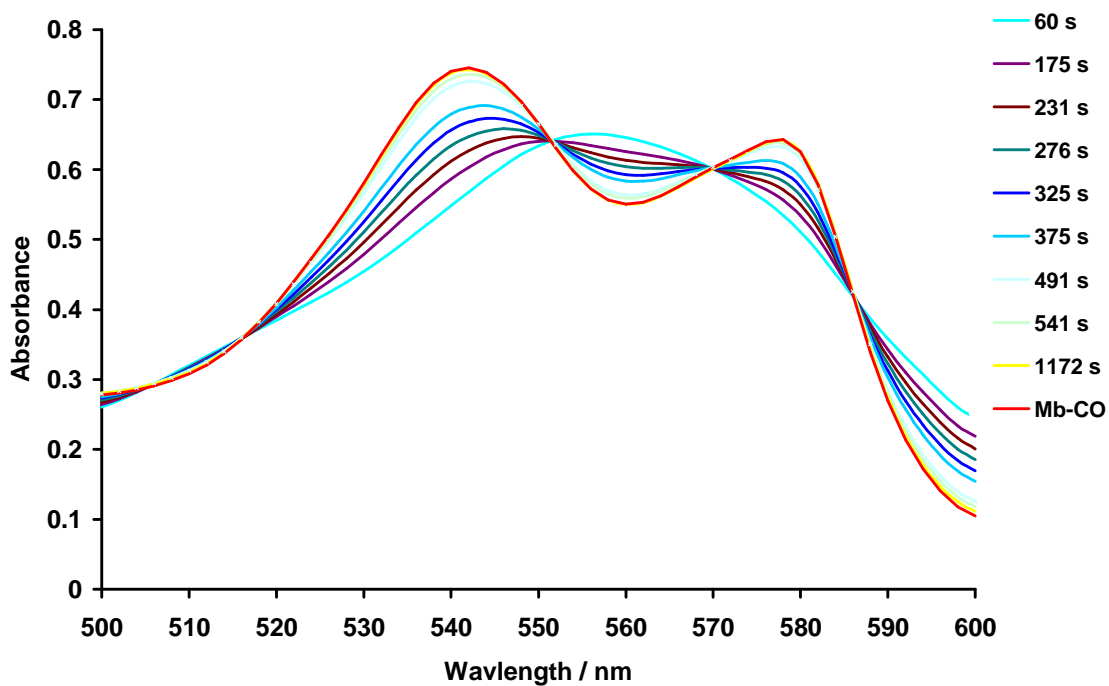

**Fig. 41.** The changes in the UV spectrum of myoglobin as CO is released from  $[\text{NEt}_4][\text{CrI}(\text{CO})_5]$  ( $40\mu\text{m}$ ).

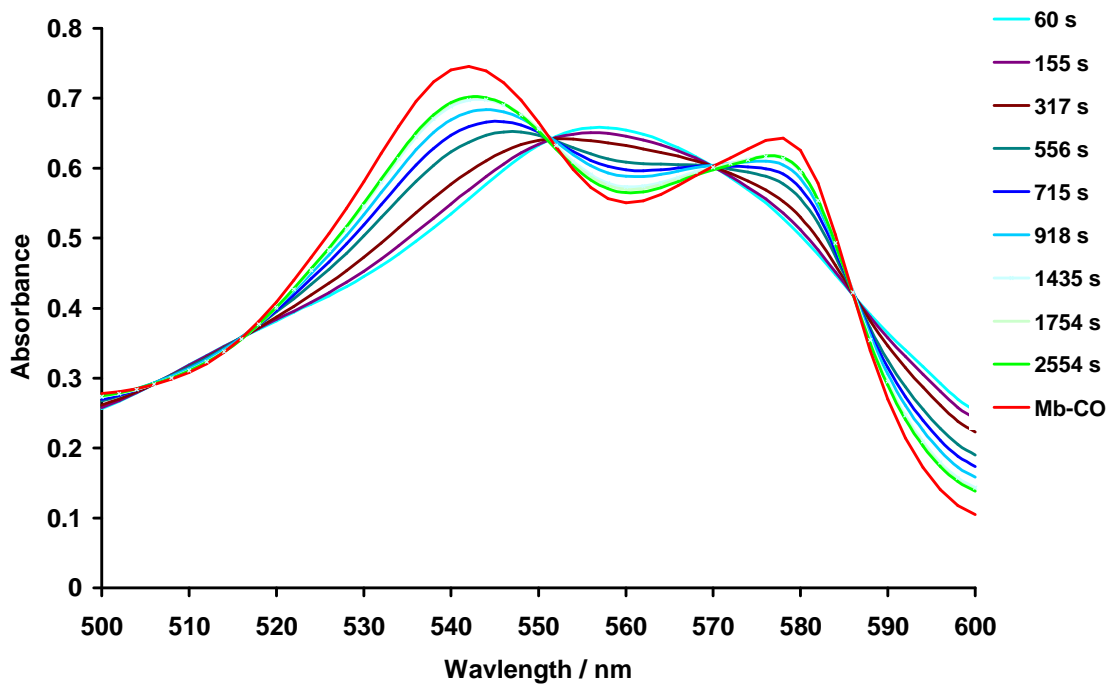

Fig. 42. The changes in the UV spectrum of myoglobin as CO is released from  $[\text{NEt}_4][\text{CrI}(\text{CO})_5]$  ( $20\mu\text{m}$ ).

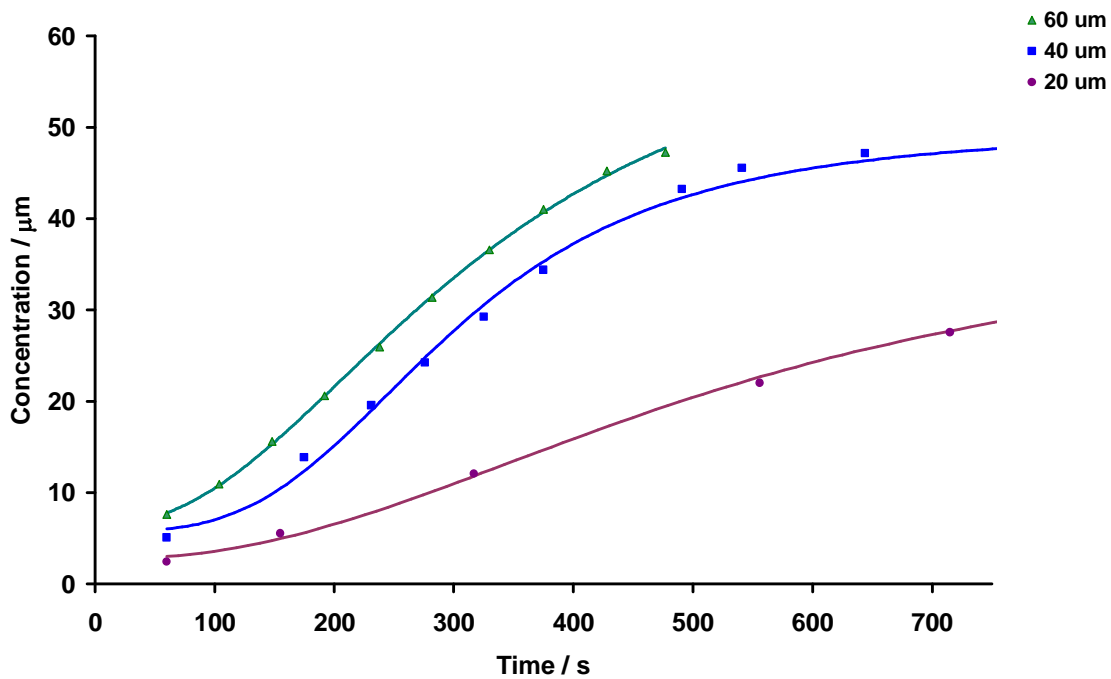

Fig. 43. Formation of MbCO over time after addition of 60  $\mu\text{M}$ , 40  $\mu\text{M}$  and 20  $\mu\text{M}$  of  $[\text{NEt}_4][\text{CrI}(\text{CO})_5]$  in DMSO to an aqueous solution containing deoxy-myoglobin at pH 7.4.



### 1.12. $[\text{NEt}_4][\text{MoCl}(\text{CO})_5]$

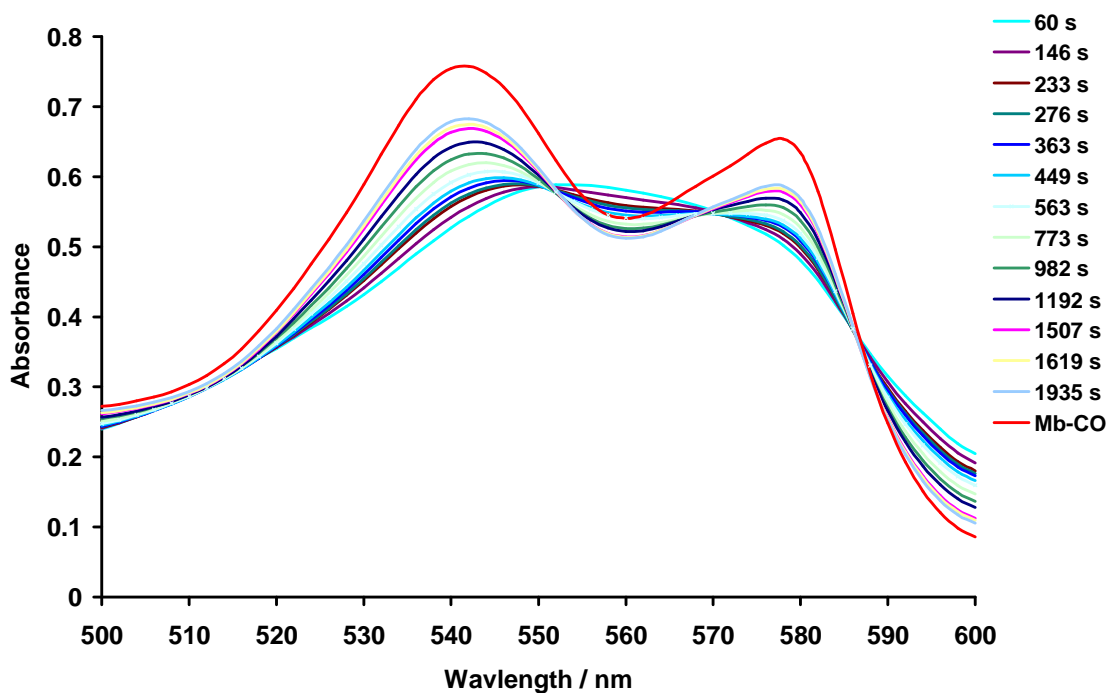

**Fig. 44.** The changes in the UV spectrum of myoglobin as CO is released from  $[\text{NEt}_4][\text{MoCl}(\text{CO})_5]$  (60 μm).

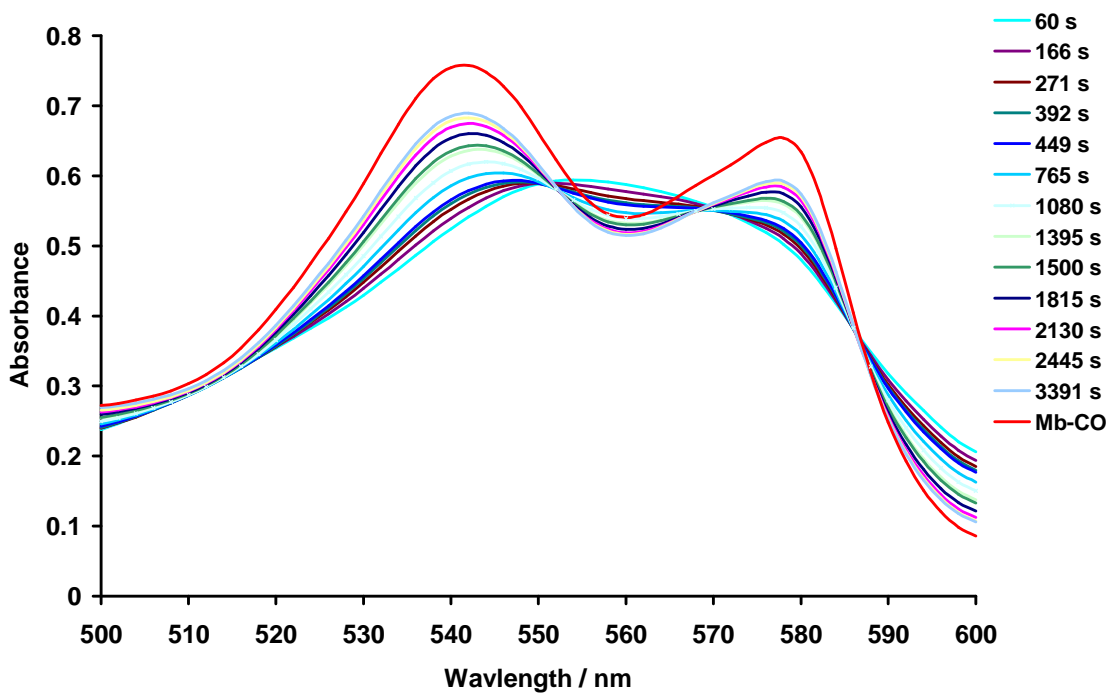

**Fig. 45.** The changes in the UV spectrum of myoglobin as CO is released from  $[\text{NEt}_4][\text{MoCl}(\text{CO})_5]$  (40 μm).

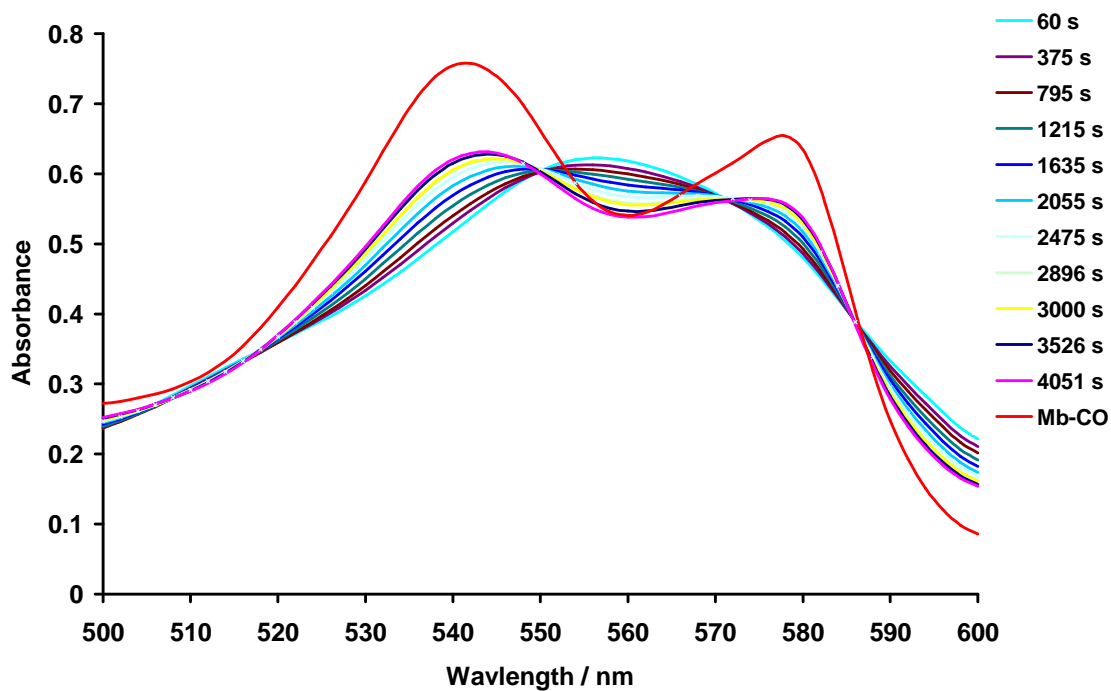

**Fig. 46.** The changes in the UV spectrum of myoglobin as CO is released from  $[\text{NEt}_4][\text{MoCl}(\text{CO})_5]$  ( $20\mu\text{m}$ ).

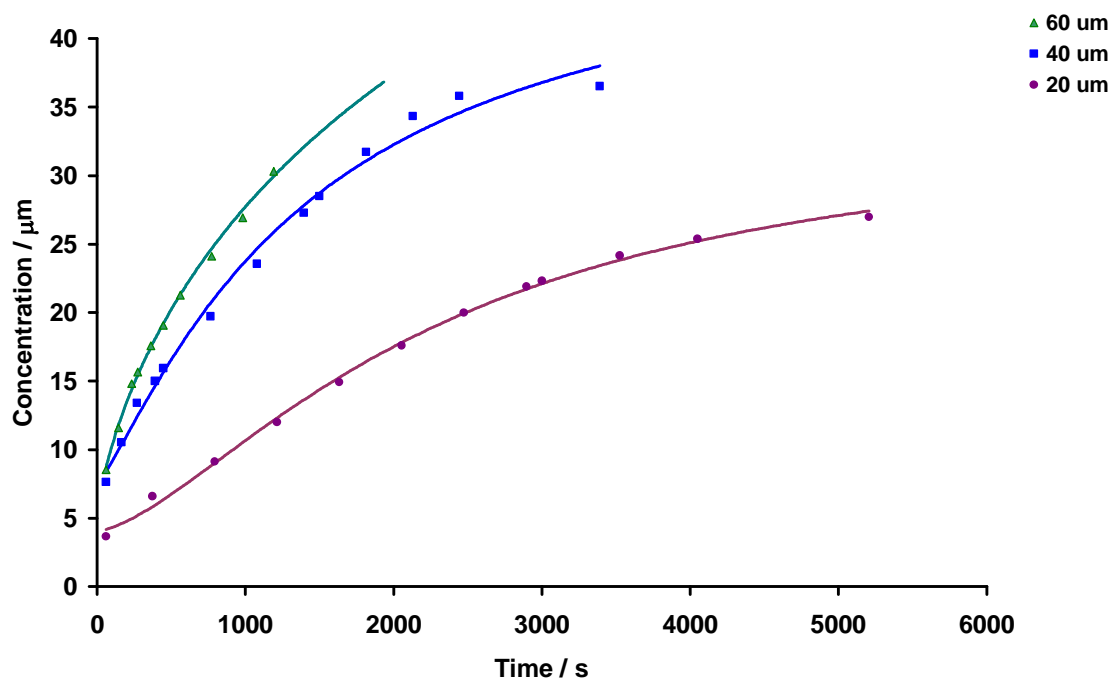

**Fig. 47.** Formation of MbCO over time after addition of  $60\mu\text{M}$ ,  $40\mu\text{M}$  and  $20\mu\text{M}$  of  $[\text{NEt}_4][[\text{MoCl}(\text{CO})_5]$  in DMSO to an aqueous solution containing deoxy-myoglobin at pH 7.4.

### 1.13. $[\text{NEt}_4][\text{MoBr}(\text{CO})_5]$

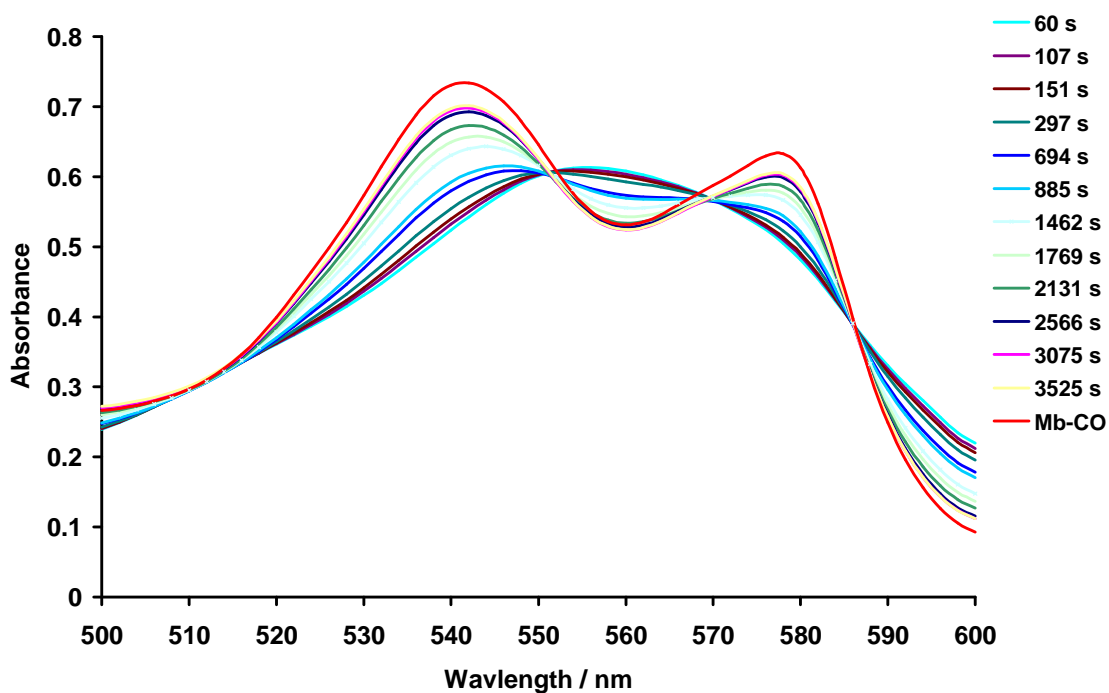

**Fig. 48.** The changes in the UV spectrum of myoglobin as CO is released from  $[\text{NEt}_4][\text{MoBr}(\text{CO})_5]$  (60 μm).

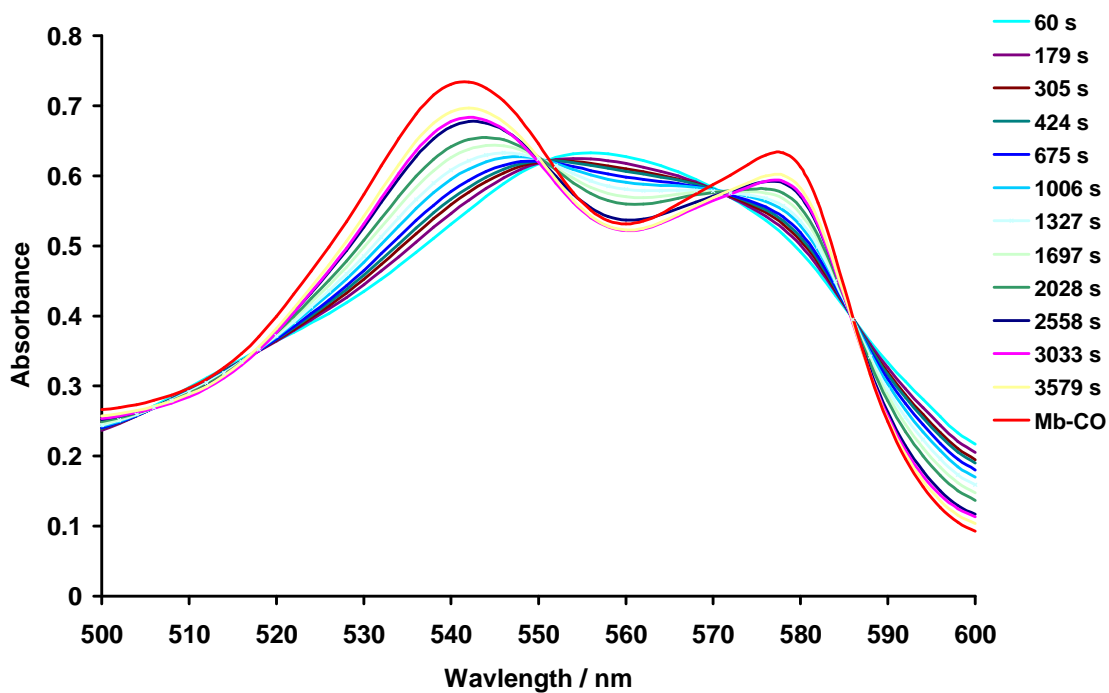

**Fig. 49.** The changes in the UV spectrum of myoglobin as CO is released from  $[\text{NEt}_4][\text{MoBr}(\text{CO})_5]$  (40 μm).

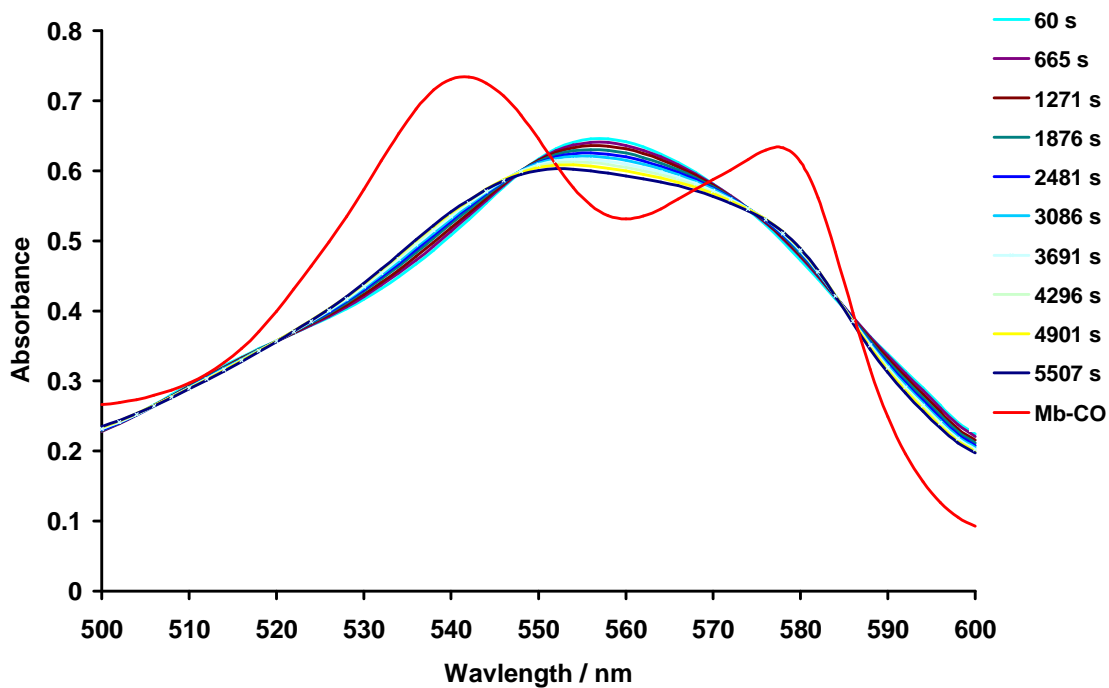

**Fig. 50.** The changes in the UV spectrum of myoglobin as CO is released from  $[\text{NEt}_4][\text{MoBr}(\text{CO})_5]$  (20  $\mu\text{M}$ ).

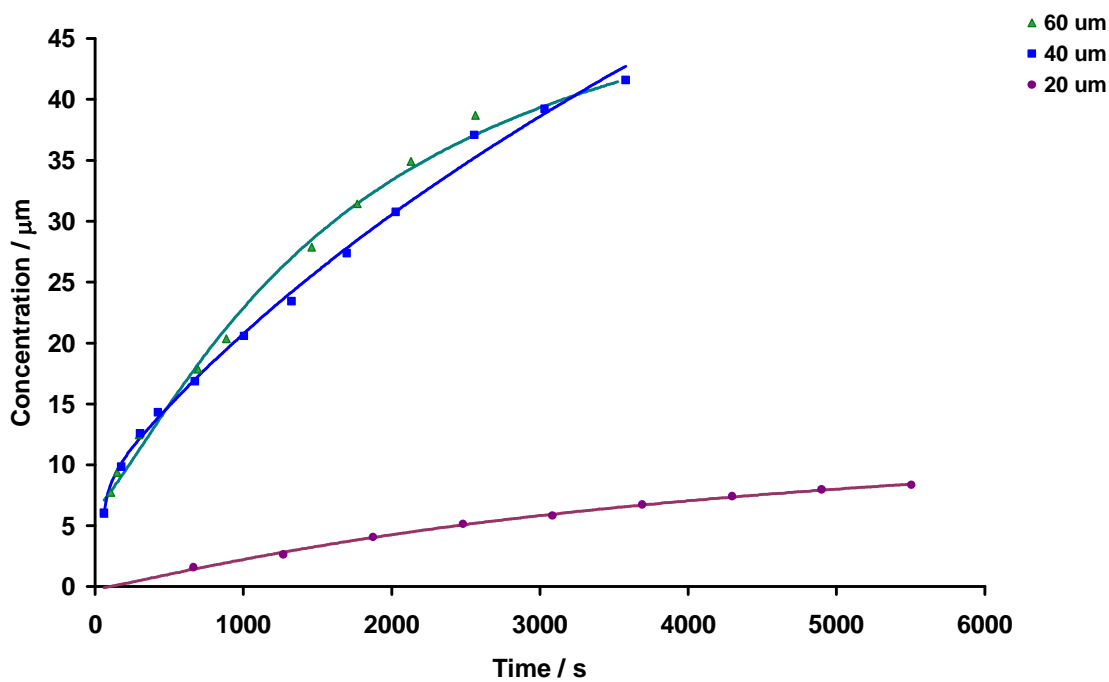

**Fig. 51.** Formation of MbCO over time after addition of 60  $\mu\text{M}$ , 40  $\mu\text{M}$  and 20  $\mu\text{M}$  of  $[\text{NEt}_4][\text{MoBr}(\text{CO})_5]$  in DMSO to an aqueous solution containing deoxy-myoglobin at pH 7.4.

### 1.14. $[\text{NEt}_4][\text{MoI}(\text{CO})_5]$

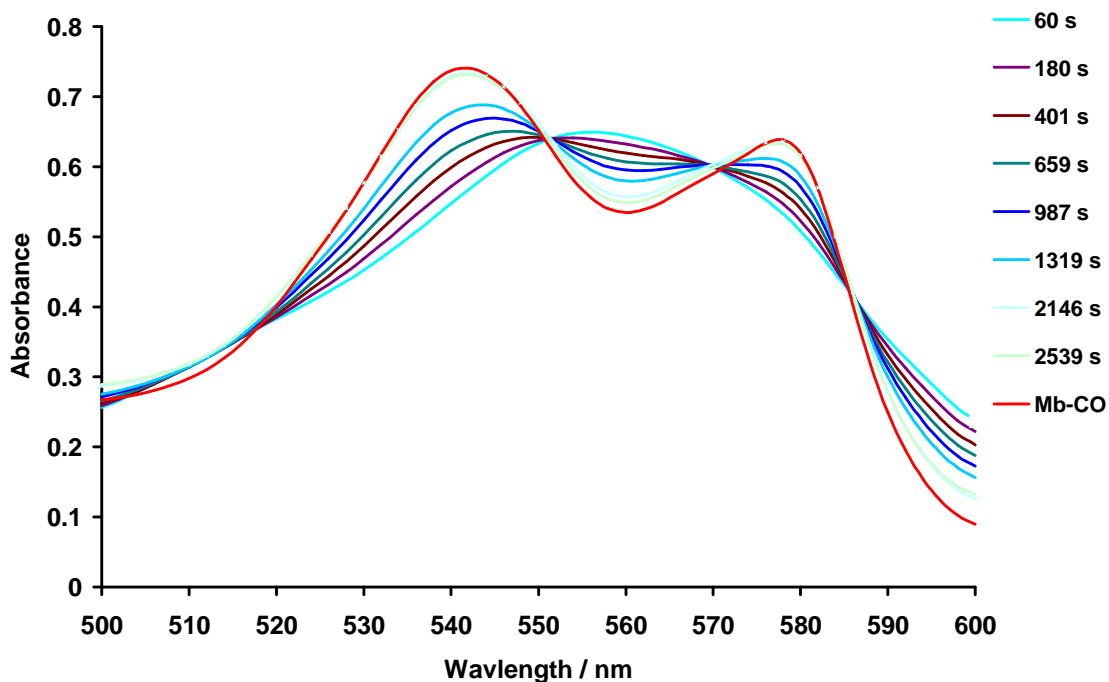

**Fig. 52.** The changes in the UV spectrum of myoglobin as CO is released from  $[\text{NEt}_4][\text{MoI}(\text{CO})_5]$  ( $60\mu\text{M}$ ).

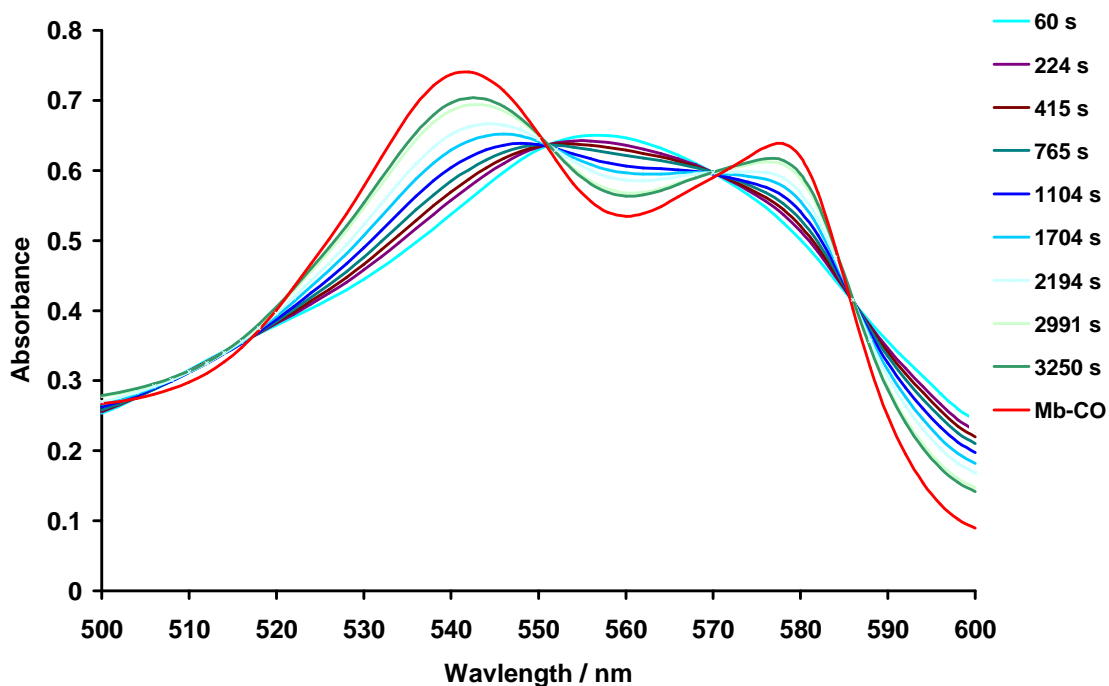

**Fig. 53.** The changes in the UV spectrum of myoglobin as CO is released from  $[\text{NEt}_4][\text{MoI}(\text{CO})_5]$  ( $40\mu\text{M}$ ).

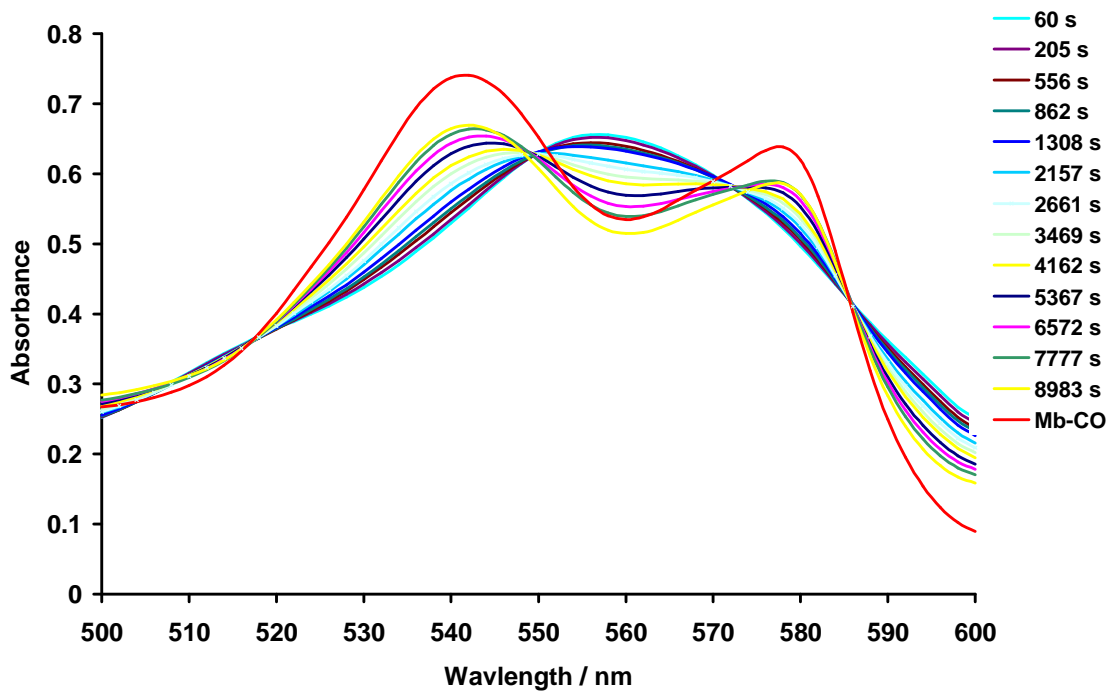

**Fig. 54.** The changes in the UV spectrum of myoglobin as CO is released from  $[\text{NEt}_4][\text{MoI}(\text{CO})_5]$  ( $20\mu\text{m}$ ).

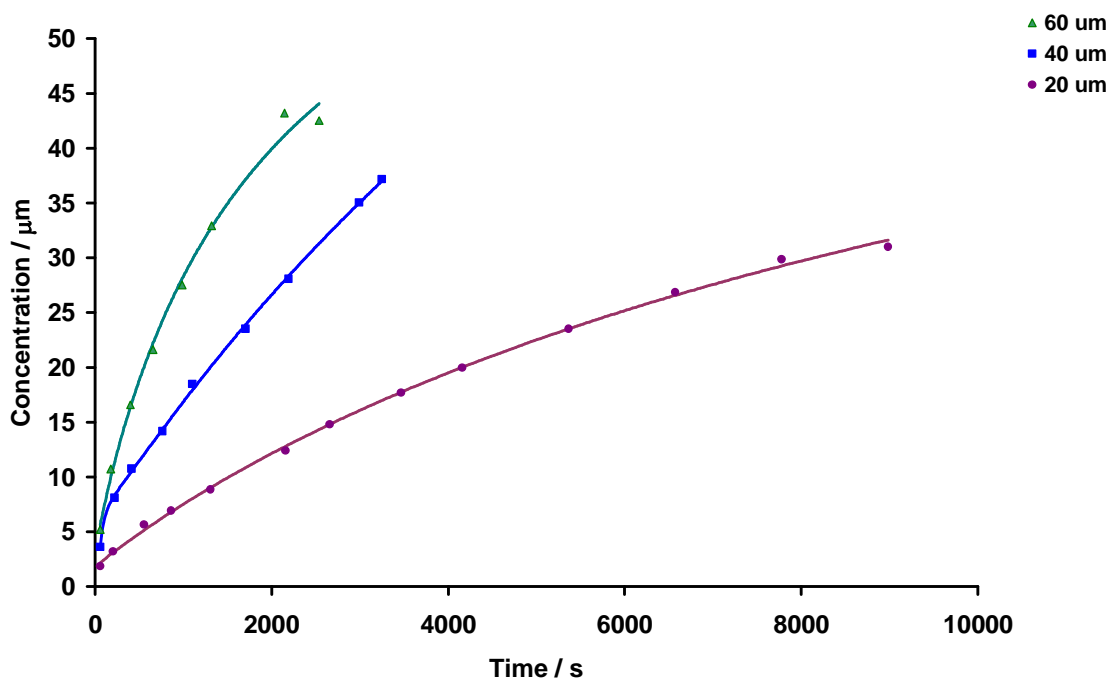

**Fig 55.** Formation of MbCO over time after addition of  $60\mu\text{M}$ ,  $40\mu\text{M}$  and  $20\mu\text{M}$  of  $[\text{NEt}_4][\text{MoI}(\text{CO})_5]$  in DMSO to an aqueous solution containing deoxy-myoglobin at pH 7.4.

### 1.15. $[\text{NEt}_4][\text{WCl}(\text{CO})_5]$

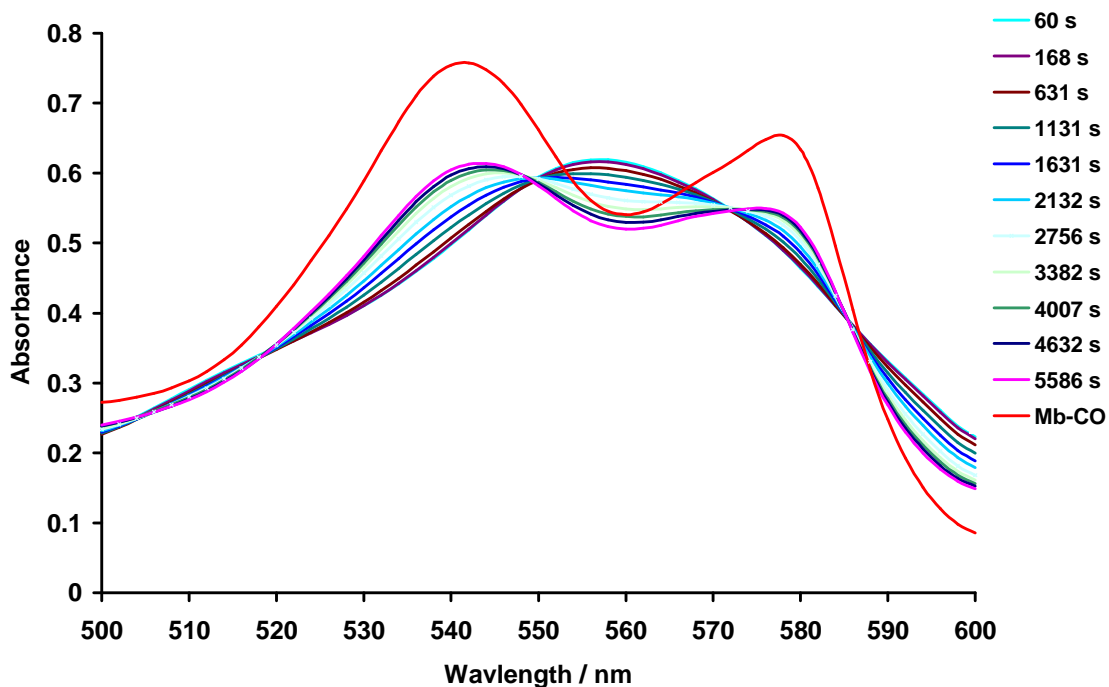

**Fig. 56.** The changes in the UV spectrum of myoglobin as CO is released from  $[\text{NEt}_4][\text{WCl}(\text{CO})_5]$  ( $60\mu\text{m}$ ).

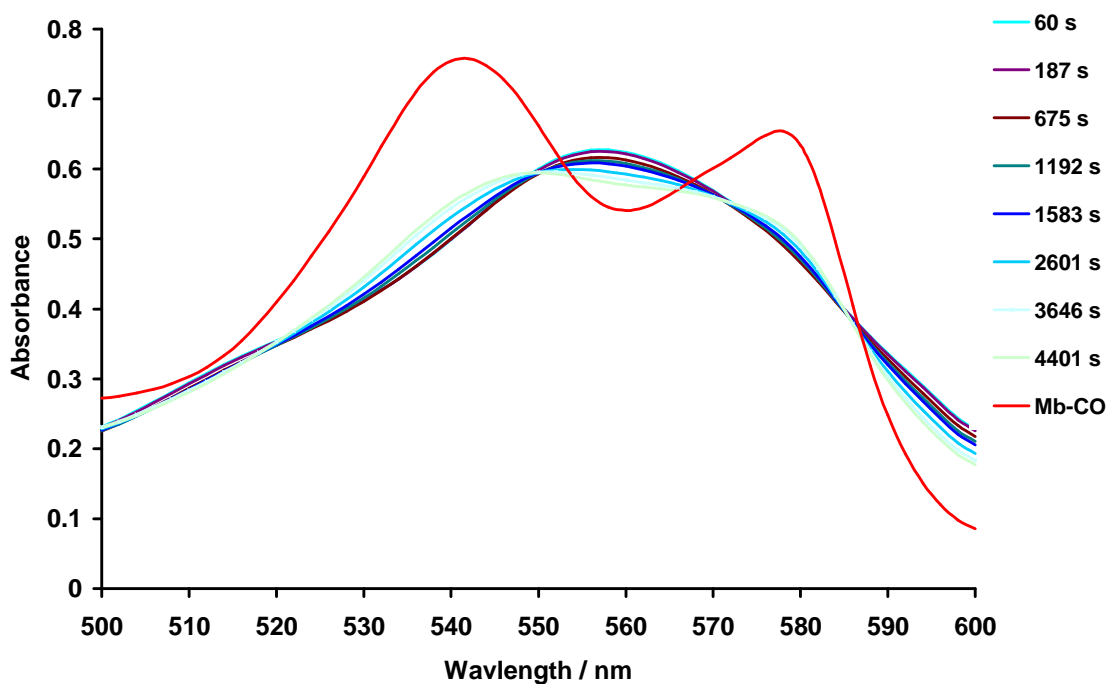

**Fig. 57.** The changes in the UV spectrum of myoglobin as CO is released from  $[\text{NEt}_4][\text{WCl}(\text{CO})_5]$  ( $40\mu\text{m}$ ).

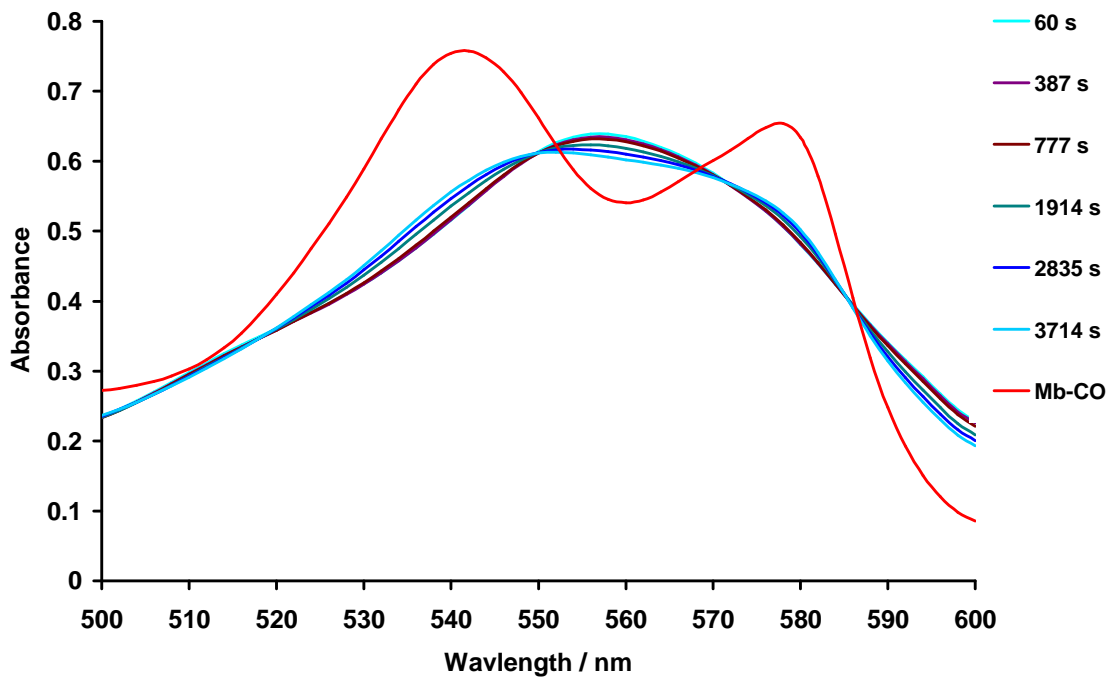

**Fig. 58.** The changes in the UV spectrum of myoglobin as CO is released from  $[\text{NEt}_4][\text{WCl}(\text{CO})_5]$  ( $20\mu\text{M}$ ).

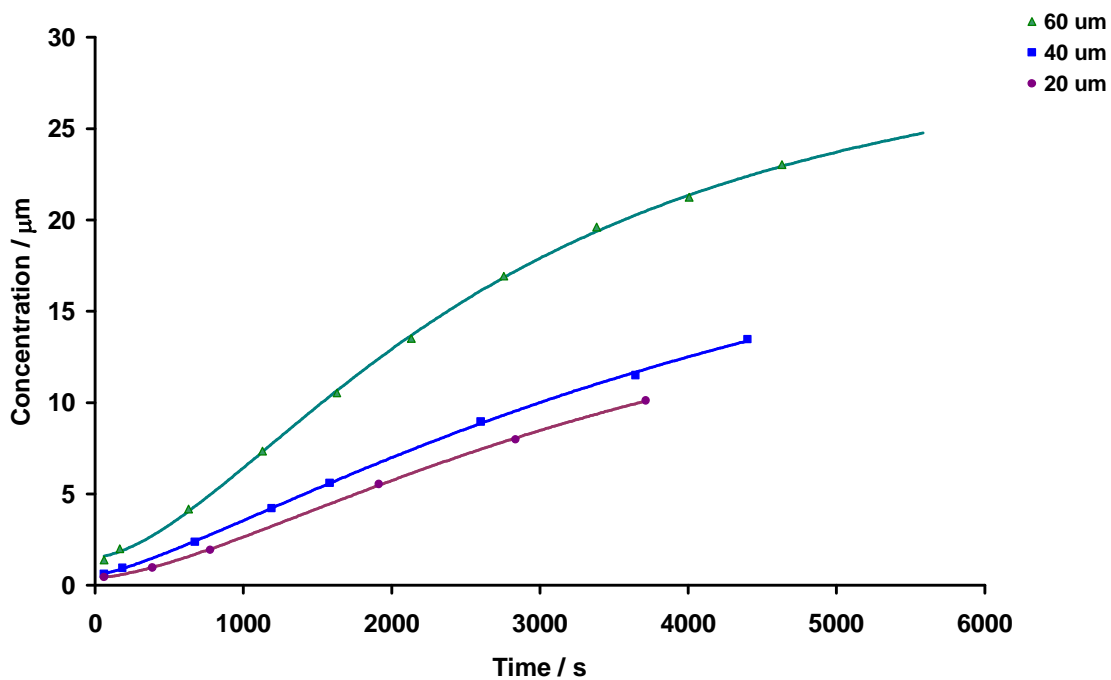

**Fig 59.** Formation of MbCO over time after addition of  $60\mu\text{M}$ ,  $40\mu\text{M}$  and  $20\mu\text{M}$  of  $[\text{NEt}_4][\text{WCl}(\text{CO})_5]$  in DMSO to an aqueous solution containing deoxy-myoglobin at pH 7.4.



### 1.16. $[\text{NEt}_4][\text{WBr}(\text{CO})_5]$

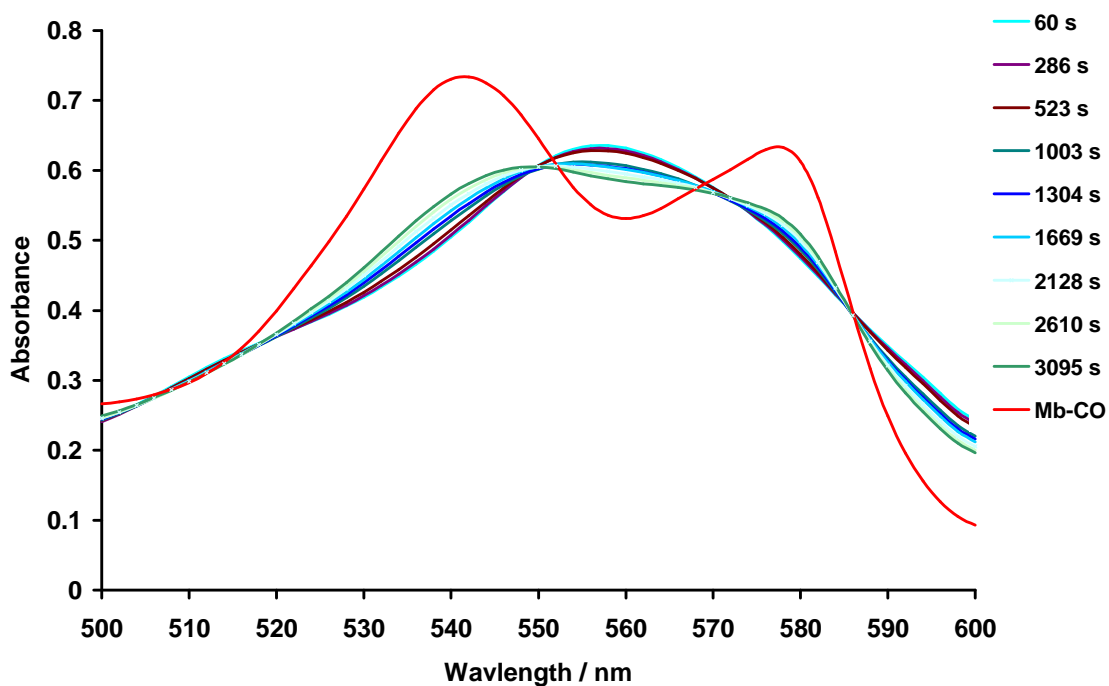

**Fig. 60.** The changes in the UV spectrum of myoglobin as CO is released from  $[\text{NEt}_4][\text{WBr}(\text{CO})_5]$  ( $60\ \mu\text{M}$ ).

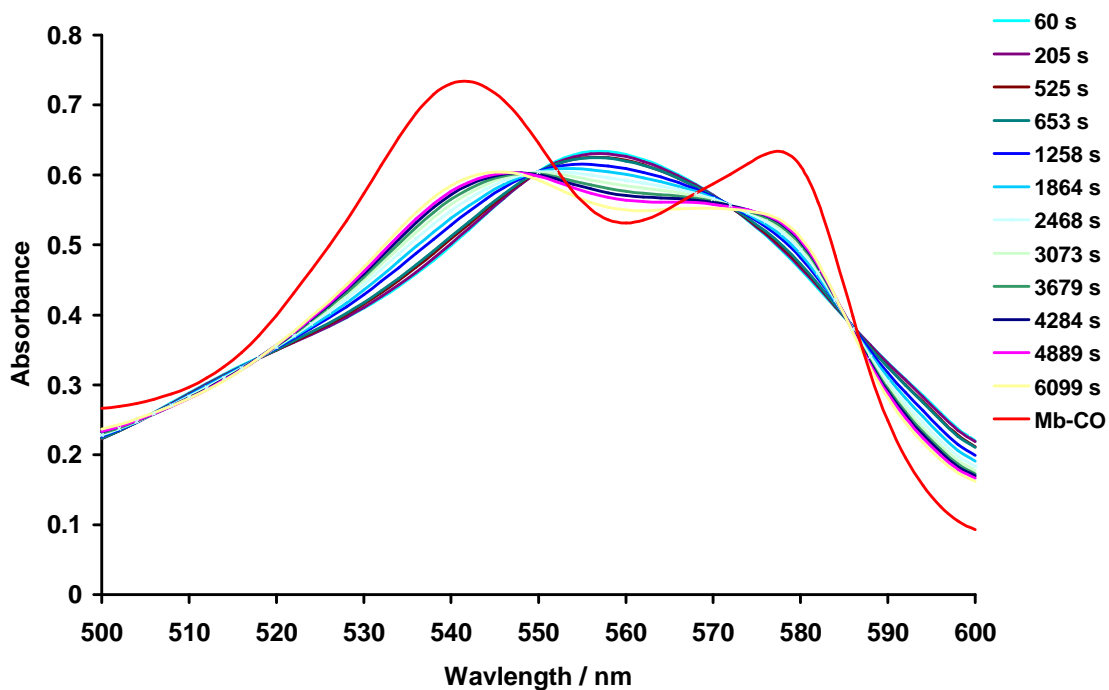

**Fig. 61.** The changes in the UV spectrum of myoglobin as CO is released from  $[\text{NEt}_4][\text{WBr}(\text{CO})_5]$  ( $40\ \mu\text{M}$ ).

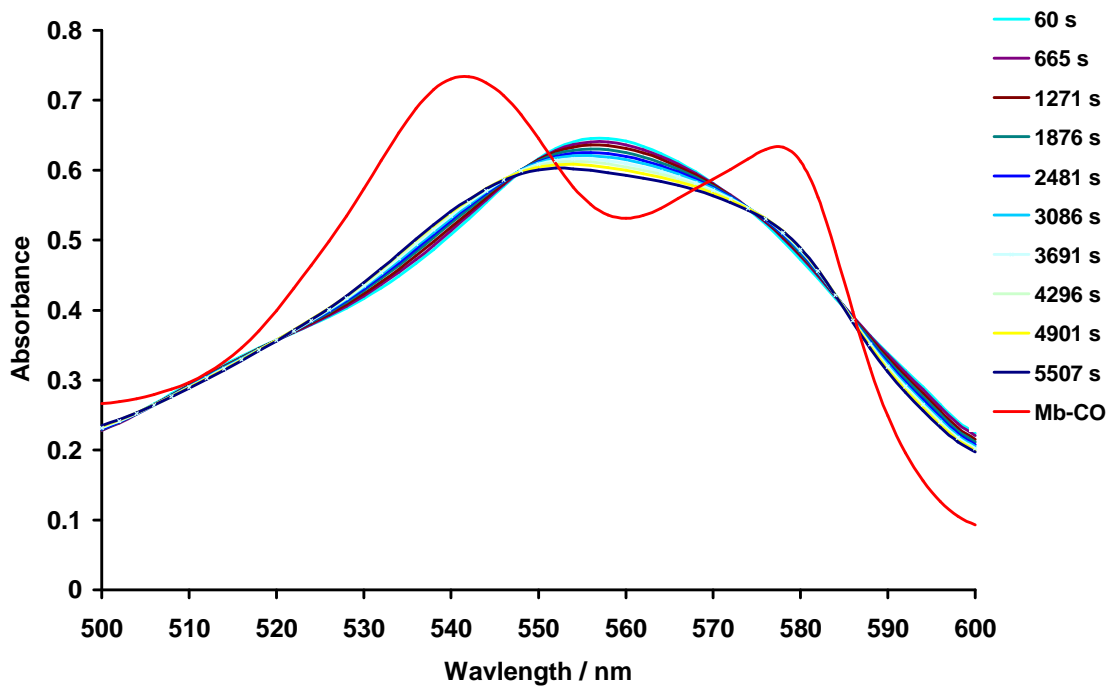

**Fig. 62.** The changes in the UV spectrum of myoglobin as CO is released from  $[\text{NEt}_4][\text{WBr}(\text{CO})_5]$  ( $20\mu\text{m}$ ).

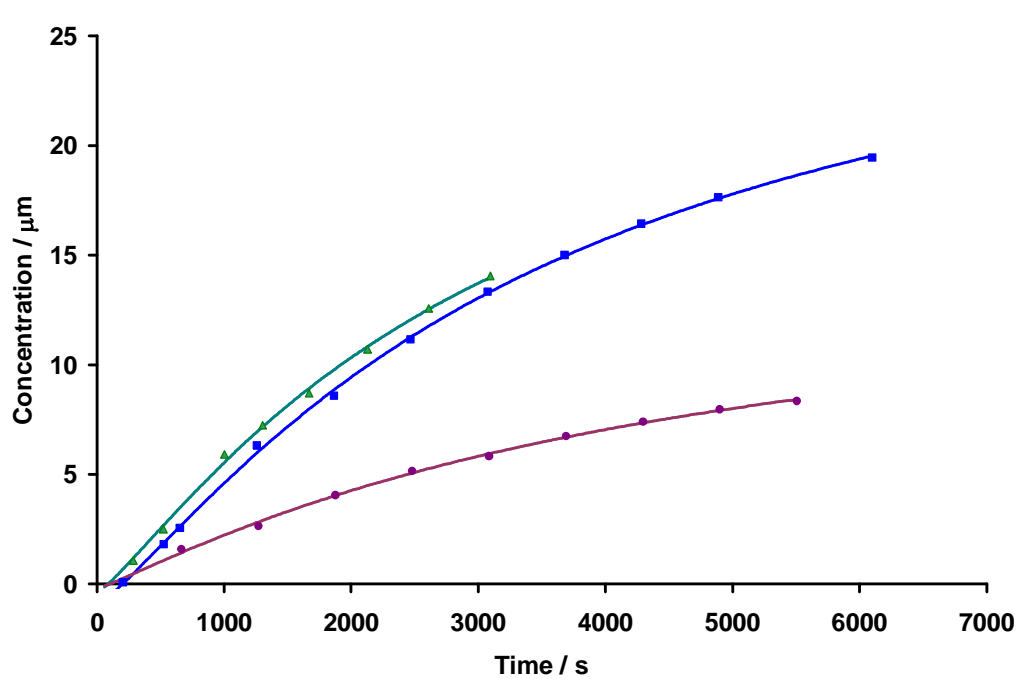

**Fig 63.** Formation of MbCO over time after addition of 60  $\mu\text{M}$ , 40 $\mu\text{M}$  and 20 $\mu\text{M}$  of  $[\text{NEt}_4][\text{WBr}(\text{CO})_5]$  in DMSO to an aqueous solution containing deoxy-myoglobin at pH 7.4.

### 1.17. $[\text{NEt}_4][\text{WI}(\text{CO})_5]$

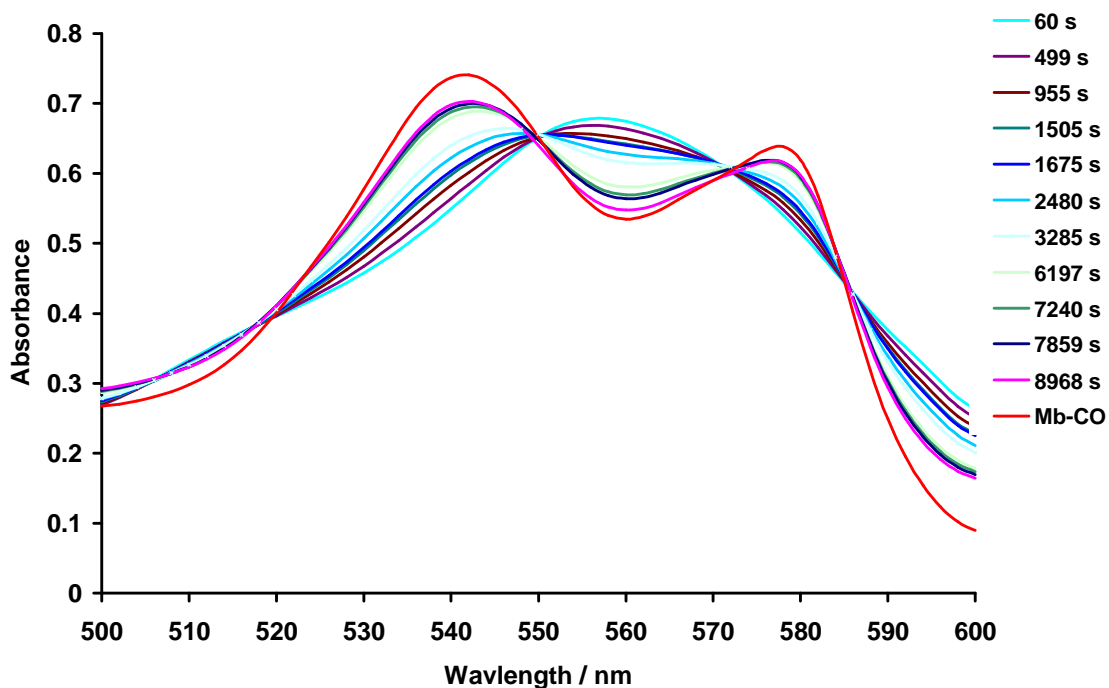

**Fig. 64.** The changes in the UV spectrum of myoglobin as CO is released from  $[\text{NEt}_4][\text{WI}(\text{CO})_5]$  (60 μm).

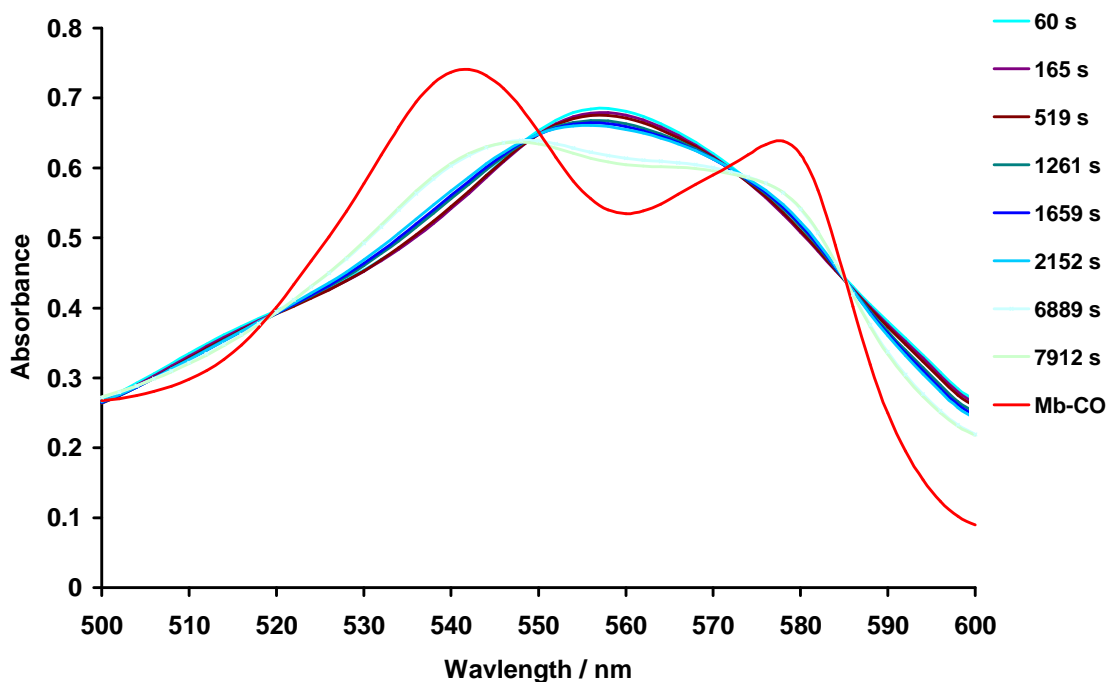

**Fig. 65.** The changes in the UV spectrum of myoglobin as CO is released from  $[\text{NEt}_4][\text{WI}(\text{CO})_5]$  (40 μm).

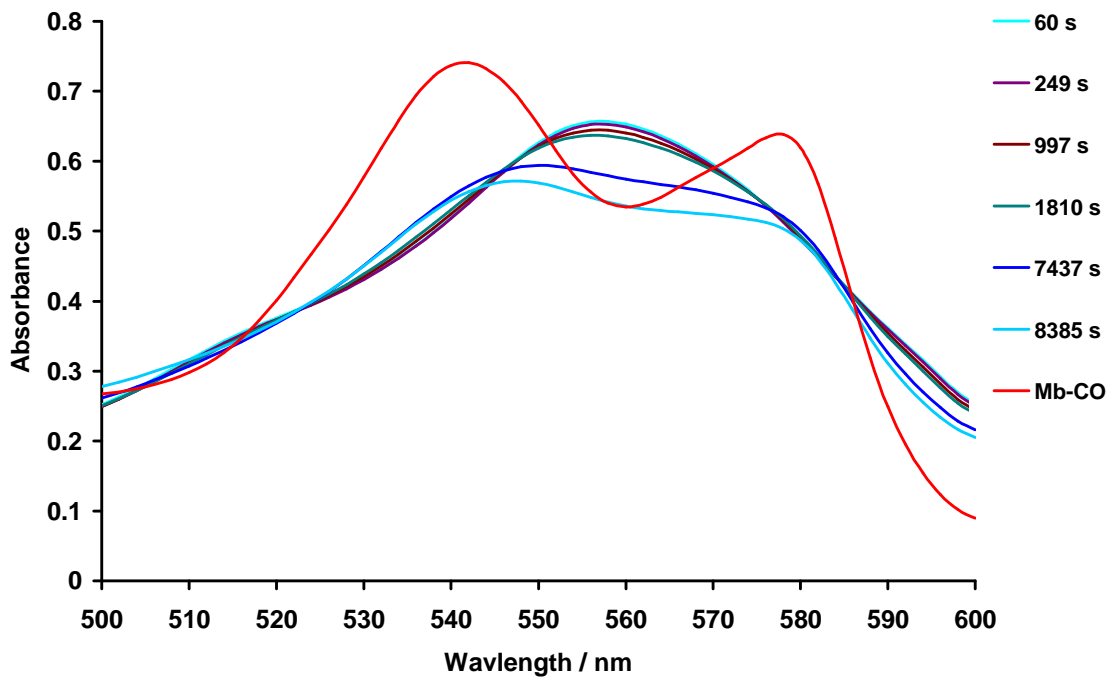

**Fig. 66.** The changes in the UV spectrum of myoglobin as CO is released from  $[\text{NEt}_4][\text{WI}(\text{CO})_5]$  ( $20\mu\text{m}$ ).

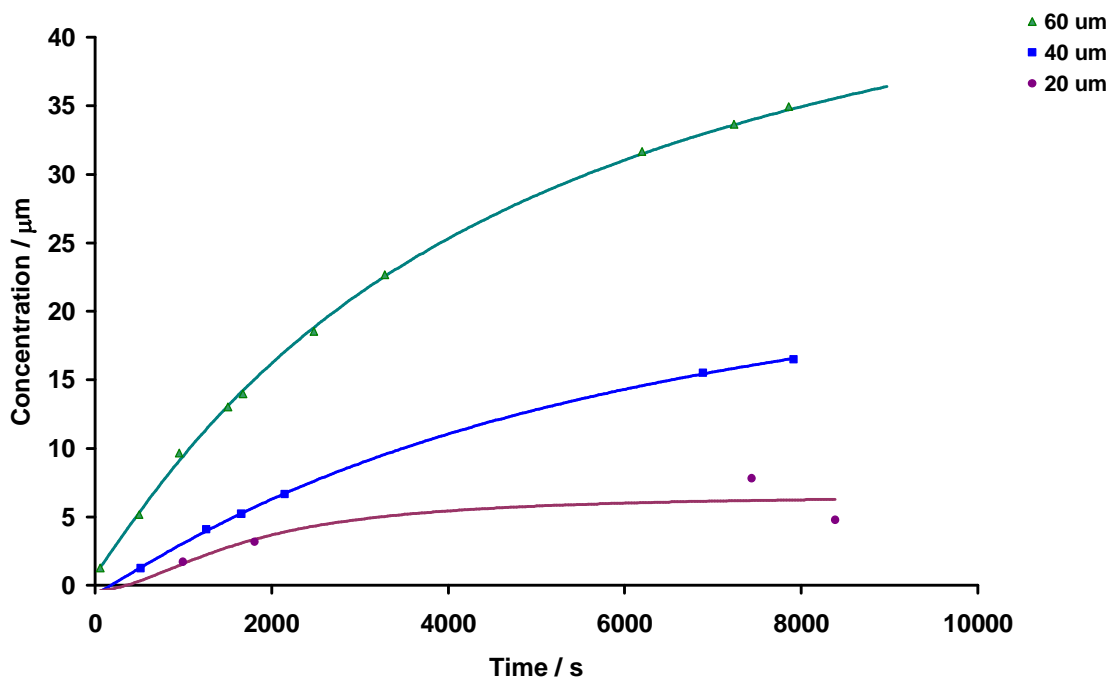

**Fig 67.** Formation of MbCO over time after addition of  $60\mu\text{M}$ ,  $40\mu\text{M}$  and  $20\mu\text{M}$  of  $[\text{NEt}_4][\text{WI}(\text{CO})_5]$  in DMSO to an aqueous solution containing deoxy-myoglobin at pH 7.4.

### 1.18. $[\text{NEt}_4][\{\text{Cr}(\text{CO})_5\}_2(\mu\text{-Cl})]$

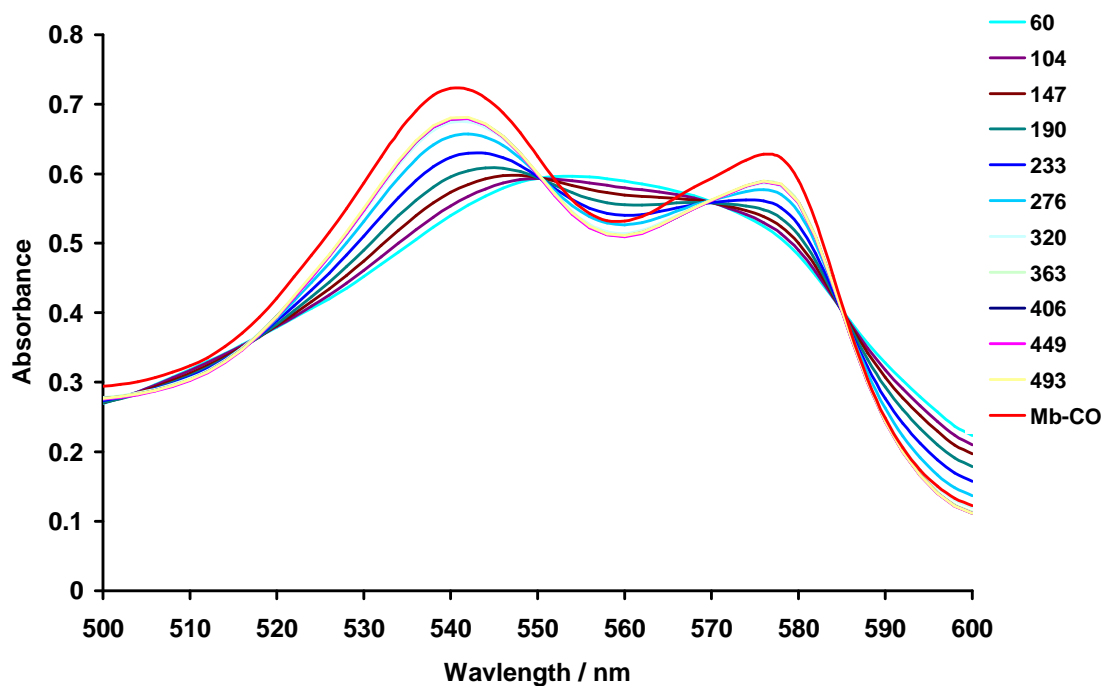

**Fig. 68.** The changes in the UV spectrum of myoglobin as CO is released from  $[\text{NEt}_4][\{\text{Cr}(\text{CO})_5\}_2(\mu\text{-Cl})]$  (60 μm).

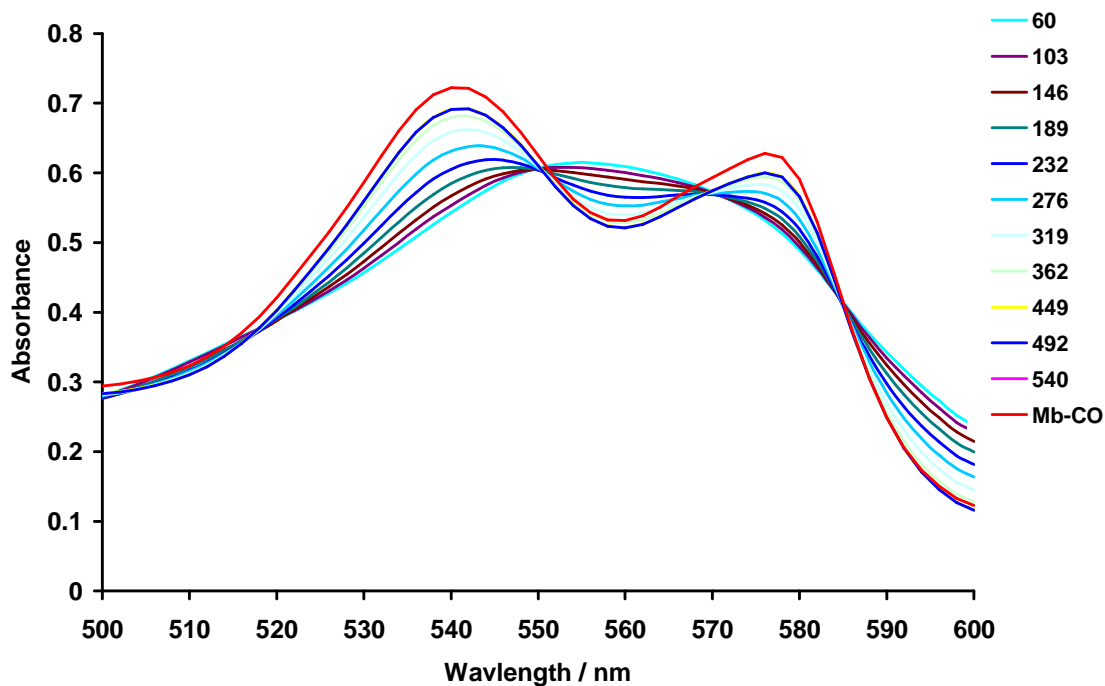

**Fig. 69.** The changes in the UV spectrum of myoglobin as CO is released from  $[\text{NEt}_4][\{\text{Cr}(\text{CO})_5\}_2(\mu\text{-Cl})]$  (40 μm).

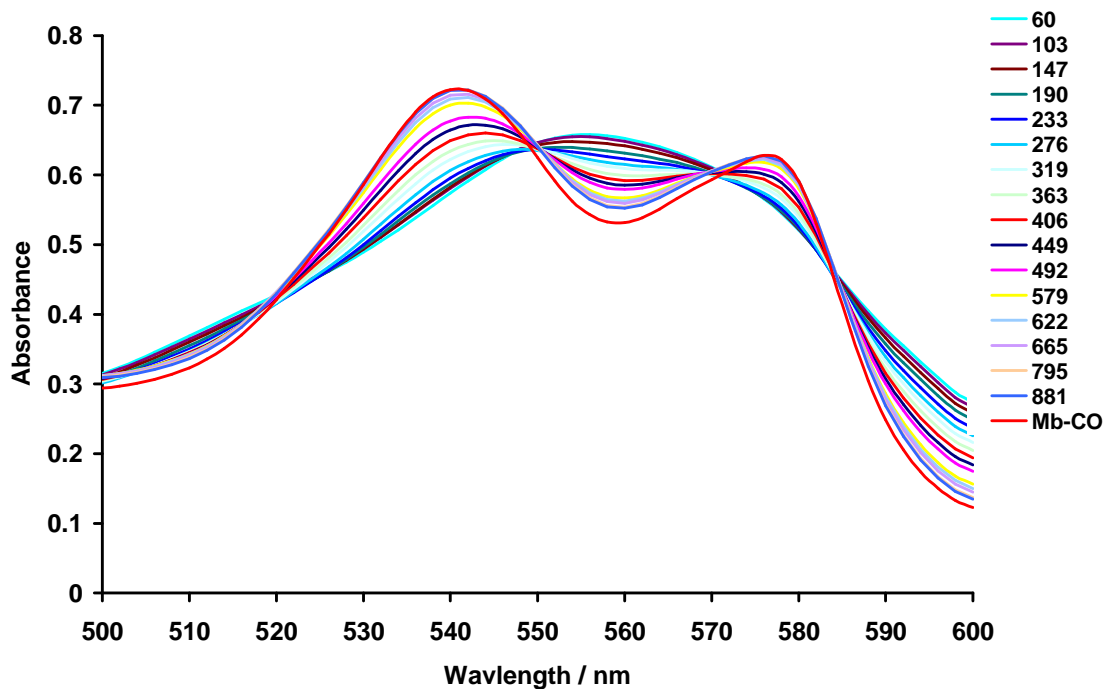

**Fig. 70.** The changes in the UV spectrum of myoglobin as CO is released from  $[\text{NEt}_4][\{\text{Cr}(\text{CO})_5\}_2(\mu\text{-Cl})]$

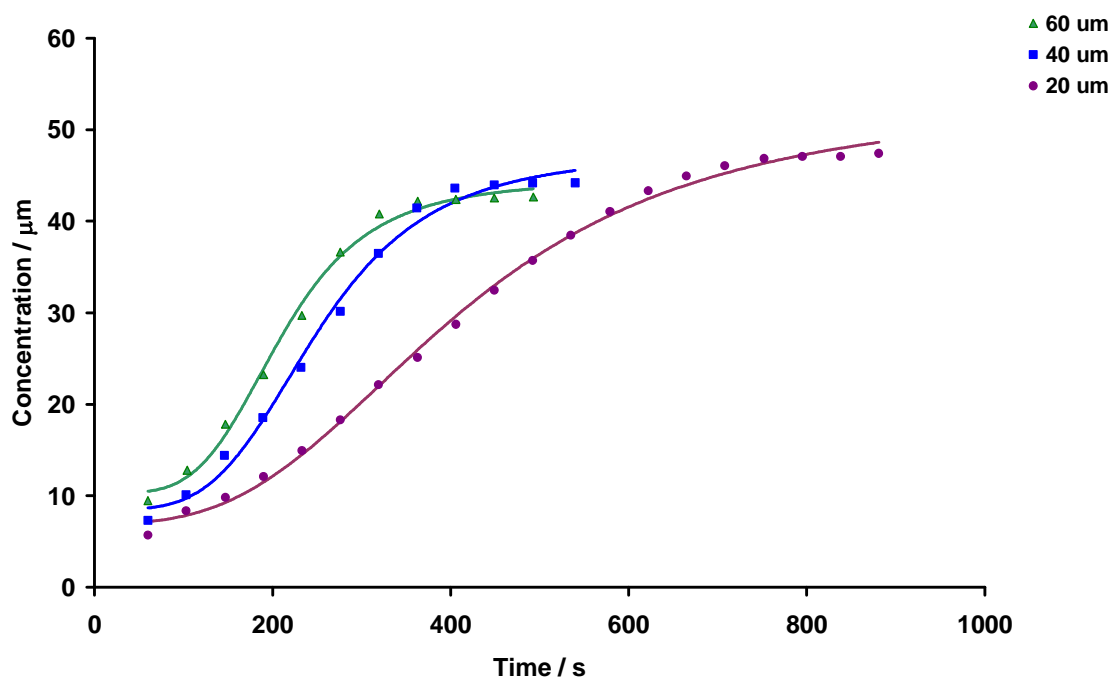

**Fig 71.** Formation of MbCO over time after addition of 60  $\mu\text{M}$ , 40  $\mu\text{M}$  and 20  $\mu\text{M}$  of  $[\text{NEt}_4][\{\text{Cr}(\text{CO})_5\}_2(\mu\text{-Cl})]$  in DMSO to an aqueous solution containing deoxy-myoglobin at pH 7.4.

### 1.19. $[\text{NEt}_4][\{\text{Cr}(\text{CO})_5\}_2(\mu\text{-Br})]$

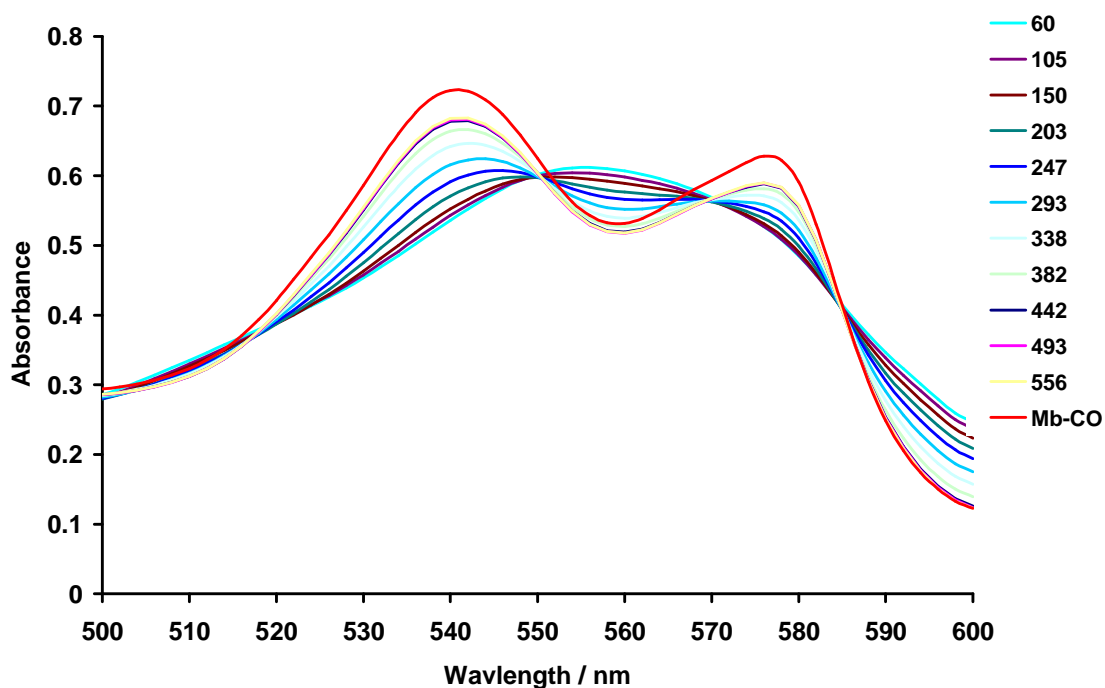

**Fig. 72.** The changes in the UV spectrum of myoglobin as CO is released from  $[\text{NEt}_4][\{\text{Cr}(\text{CO})_5\}_2(\mu\text{-Br})]$  (60 μm).

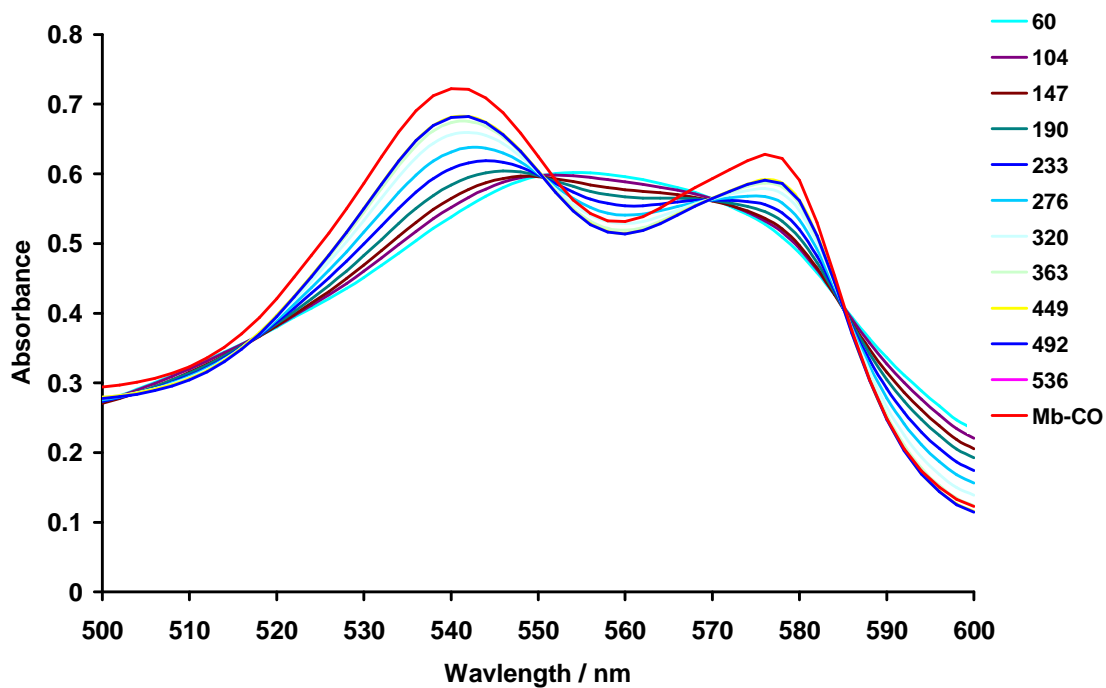

**Fig. 73.** The changes in the UV spectrum of myoglobin as CO is released from  $[\text{NEt}_4][\{\text{Cr}(\text{CO})_5\}_2(\mu\text{-Br})]$  (40 μm).

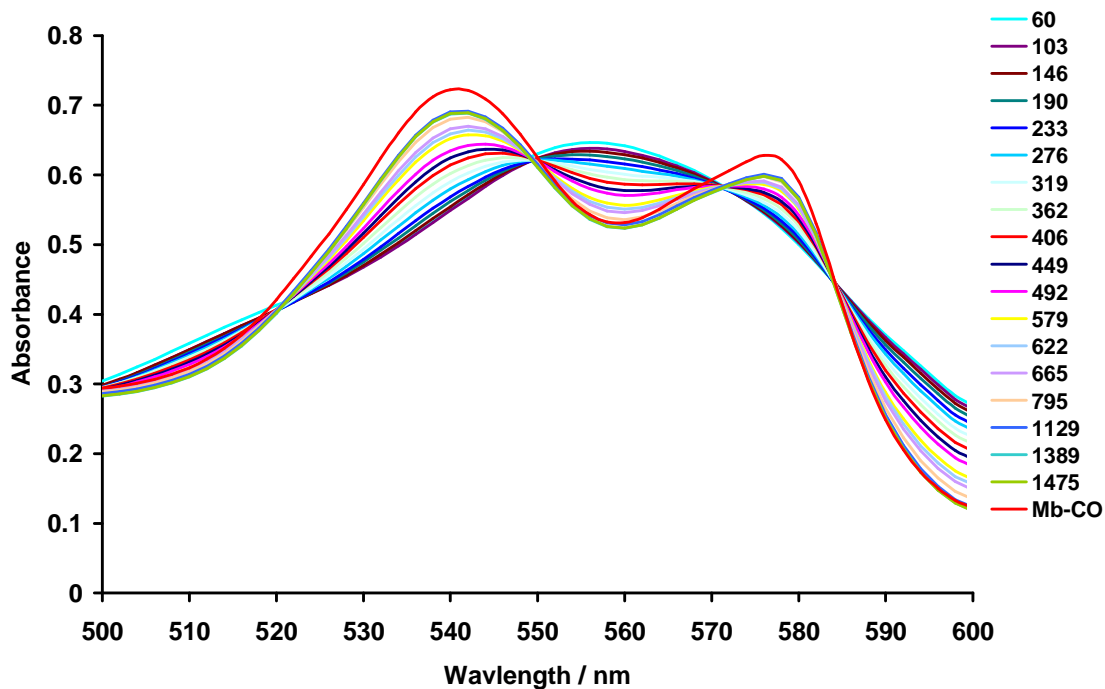

**Fig. 74.** The changes in the UV spectrum of myoglobin as CO is released from  $[\text{NEt}_4][\{\text{Cr}(\text{CO})_5\}_2(\mu\text{-Br})]$

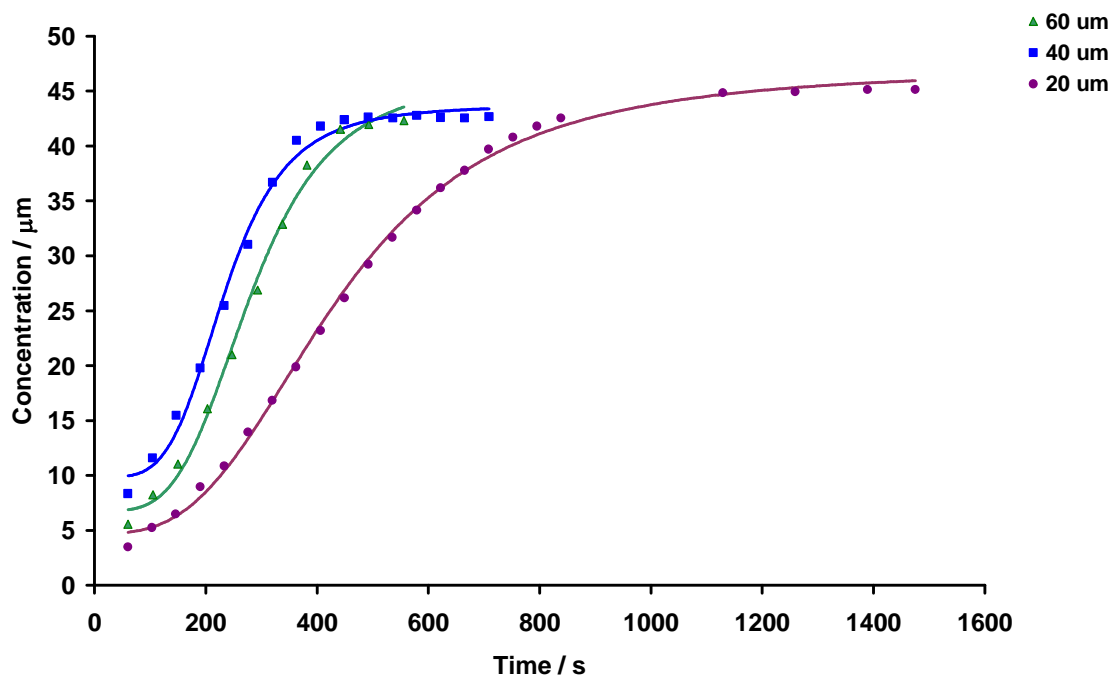

**Fig 75.** Formation of MbCO over time after addition of 60  $\mu\text{M}$ , 40  $\mu\text{M}$  and 20  $\mu\text{M}$  of  $[\text{NEt}_4][\{\text{Cr}(\text{CO})_5\}_2(\mu\text{-Br})]$  in DMSO to an aqueous solution containing deoxy-myoglobin at pH 7.4.



### 1.20. $[\text{NEt}_4][\{\text{Cr}(\text{CO})_5\}_2(\mu\text{-Br})]$ incubated in DMSO for 6 min

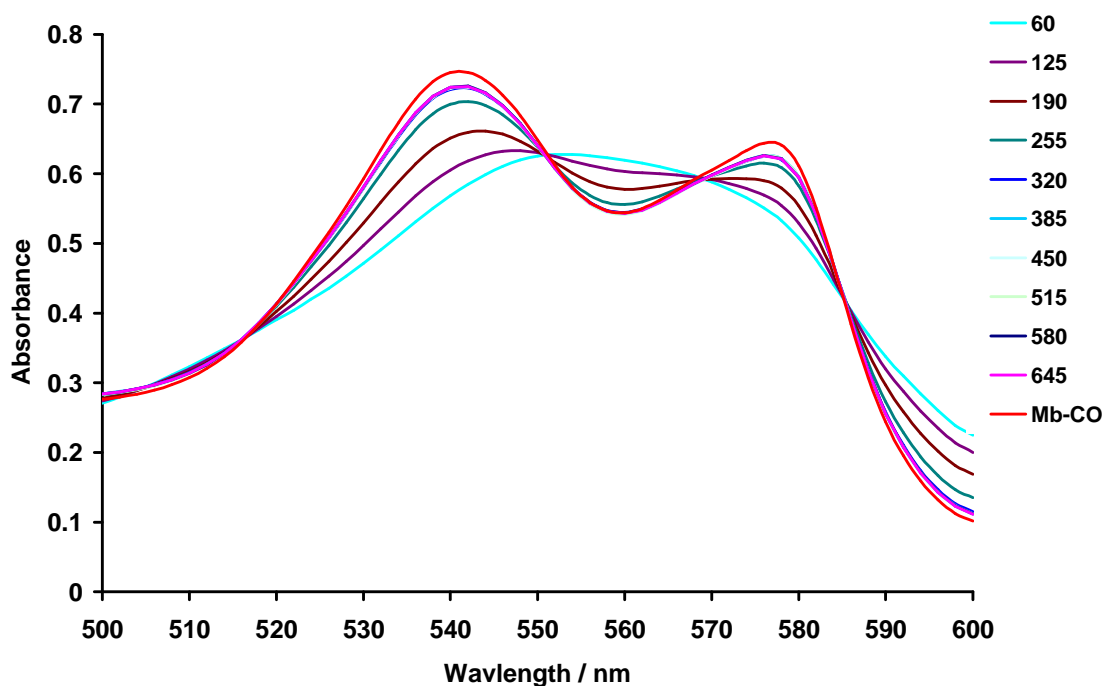

**Fig. 76.** The changes in the UV spectrum of myoglobin as CO is released from  $[\text{NEt}_4][\{\text{Cr}(\text{CO})_5\}_2(\mu\text{-Br})]$  after incubation in DMSO for 6 min (60 $\mu\text{m}$ ).

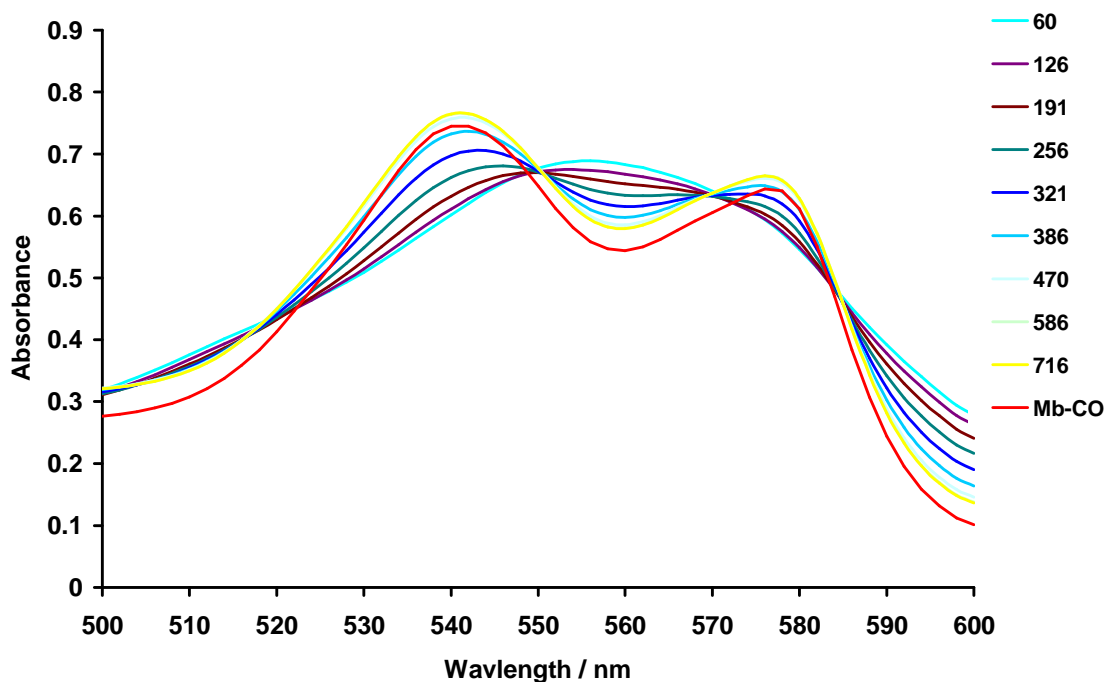

**Fig. 77.** The changes in the UV spectrum of myoglobin as CO is released from  $[\text{NEt}_4][\{\text{Cr}(\text{CO})_5\}_2(\mu\text{-Br})]$  after incubation in DMSO for 6 min (40 $\mu\text{m}$ ).

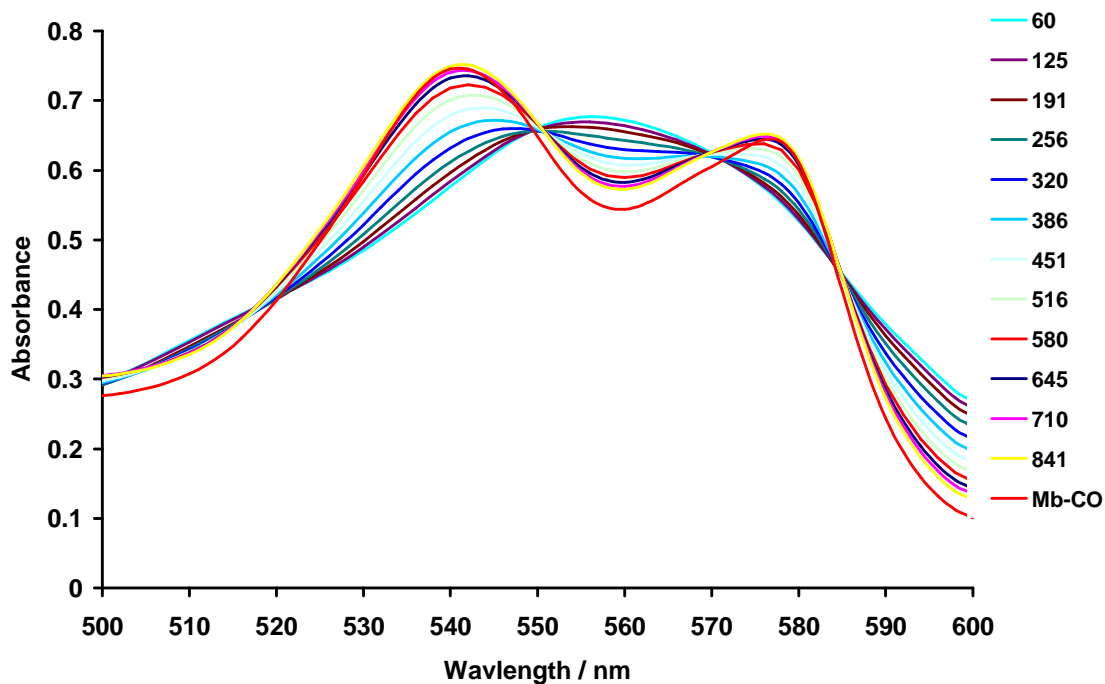

**Fig. 78.** The changes in the UV spectrum of myoglobin as CO is released from  $[\text{NEt}_4][\{\text{Cr}(\text{CO})_5\}_2(\mu\text{-Br})]$  after incubation in DMSO for 6 min (20  $\mu\text{m}$ )

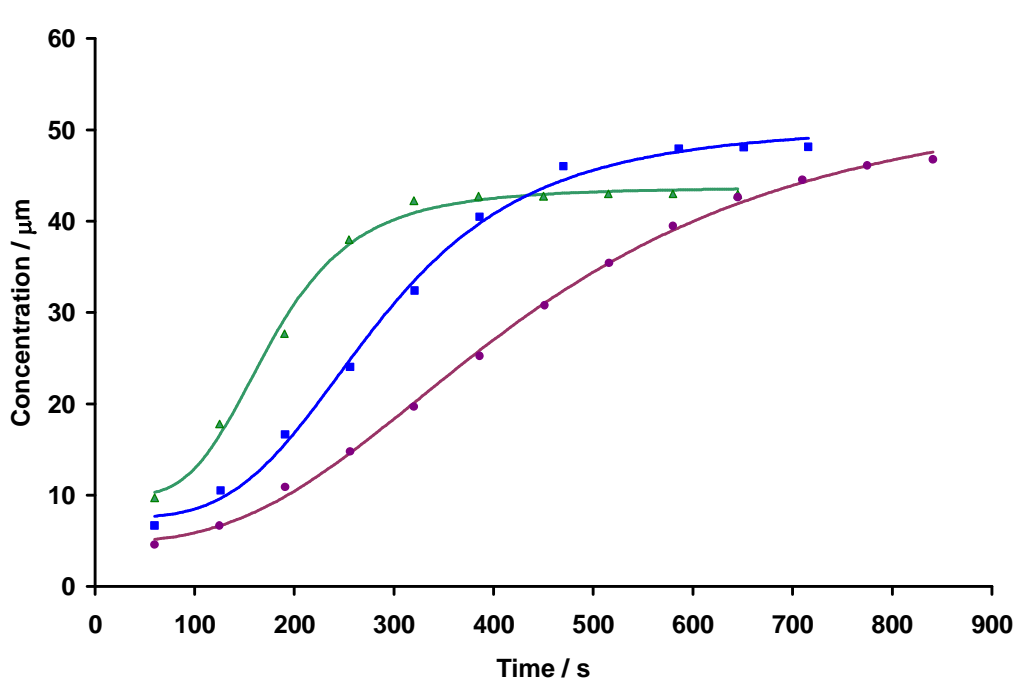

**Fig 79.** Formation of MbCO over time after addition of 60  $\mu\text{M}$ , 40  $\mu\text{M}$  and 20  $\mu\text{M}$  of  $[\text{NEt}_4][\{\text{Cr}(\text{CO})_5\}_2(\mu\text{-Br})]$  after incubation in DMSO for 6 min to an aqueous solution containing deoxy-myoglobin at pH 7.4.

### 1.21. $[\text{NEt}_4][\{\text{Cr}(\text{CO})_5\}_2(\mu\text{-Br})]$ incubated in DMSO for 30 min

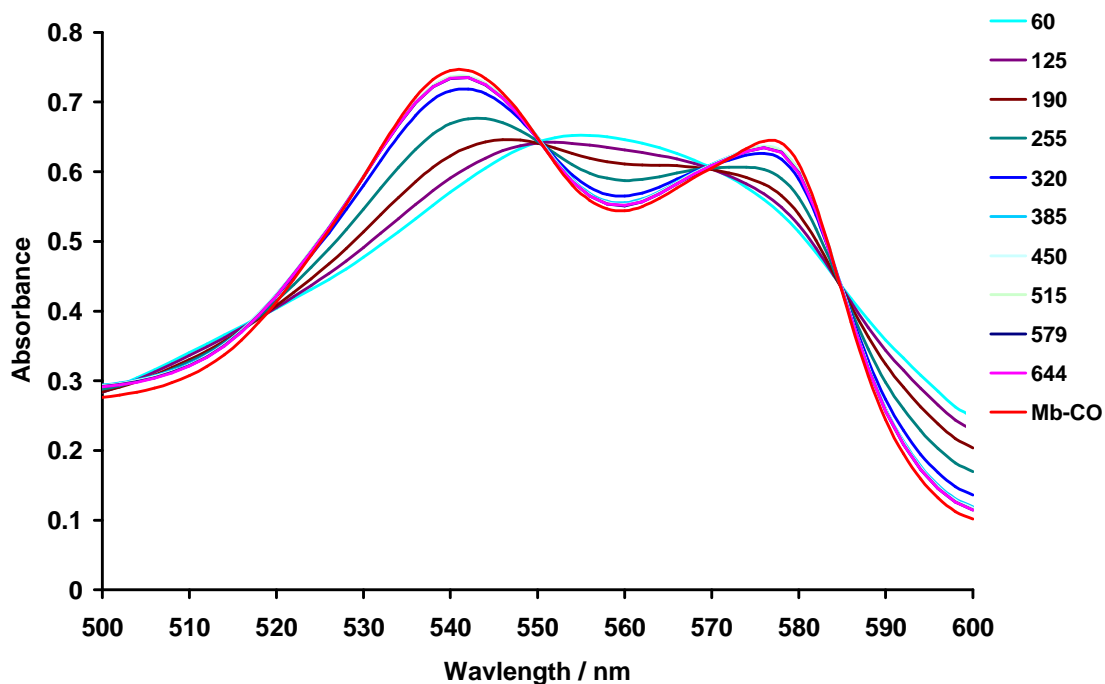

**Fig. 80.** The changes in the UV spectrum of myoglobin as CO is released from  $[\text{NEt}_4][\{\text{Cr}(\text{CO})_5\}_2(\mu\text{-Br})]$  after incubation in DMSO for 30 min ( $60\mu\text{m}$ ).

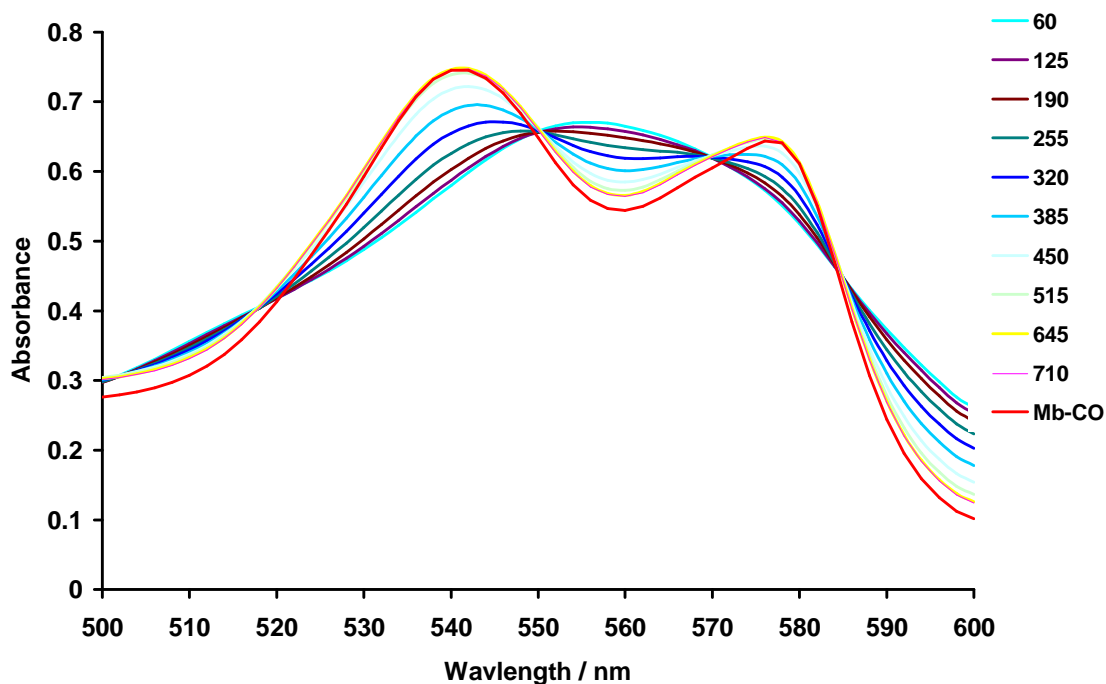

**Fig. 81.** The changes in the UV spectrum of myoglobin as CO is released from  $[\text{NEt}_4][\{\text{Cr}(\text{CO})_5\}_2(\mu\text{-Br})]$  after incubation in DMSO for 30 min ( $40\mu\text{m}$ ).

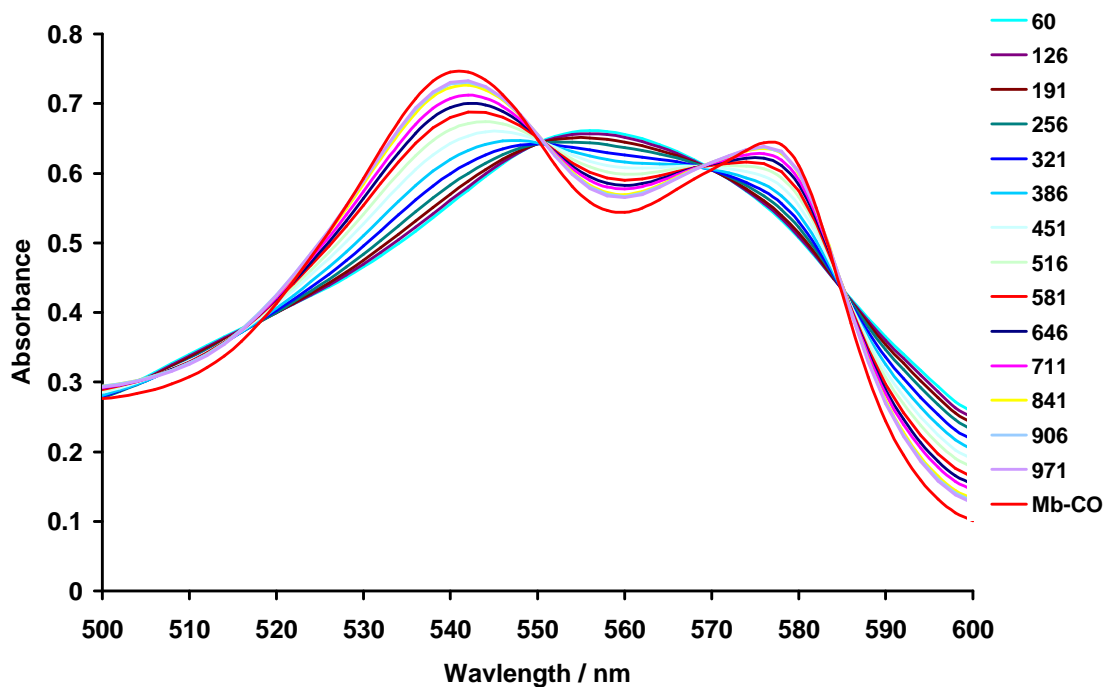

**Fig. 82.** The changes in the UV spectrum of myoglobin as CO is released from  $[\text{NEt}_4][\{\text{Cr}(\text{CO})_5\}_2(\mu\text{-Br})]$  after incubation in DMSO for 30 min ( $20 \mu\text{m}$ )

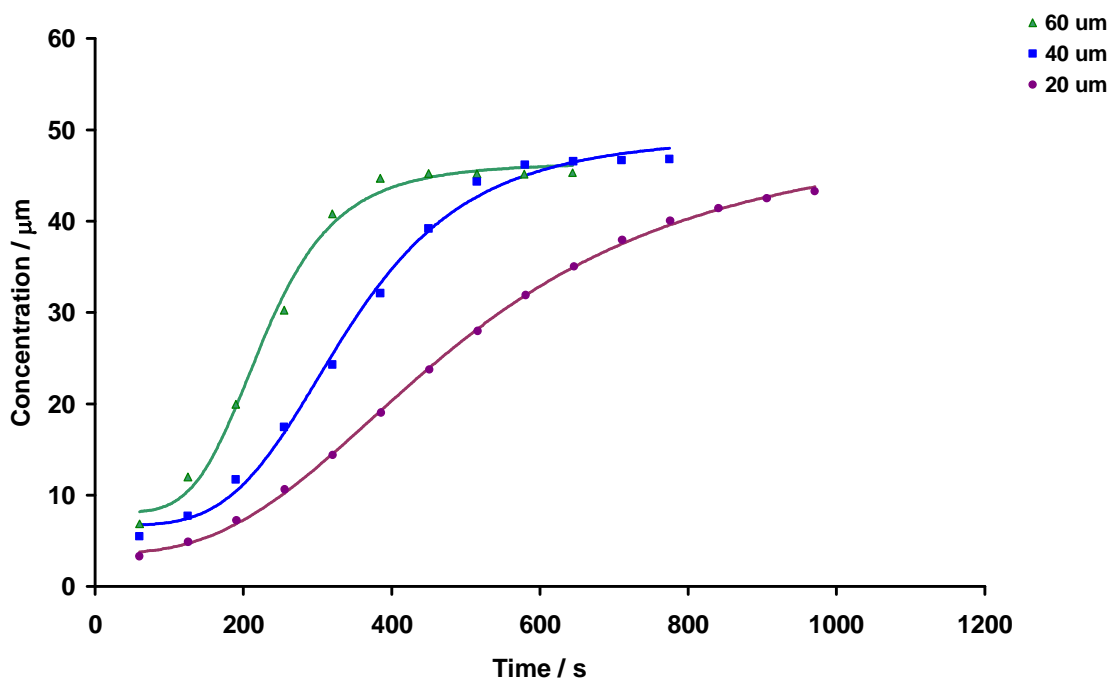

**Fig 83.** Formation of MbCO over time after addition of 60  $\mu\text{M}$ , 40  $\mu\text{M}$  and 20  $\mu\text{M}$  of  $[\text{NEt}_4][\{\text{Cr}(\text{CO})_5\}_2(\mu\text{-Br})]$  after incubation in DMSO for 30 min to an aqueous solution containing deoxy-myoglobin at pH 7.4.

### 1.22. Comparison of CO-release from $[\text{NEt}_4][\{\text{Cr}(\text{CO})_5\}_2(\mu\text{-Br})]$ after incubated in DMSO.

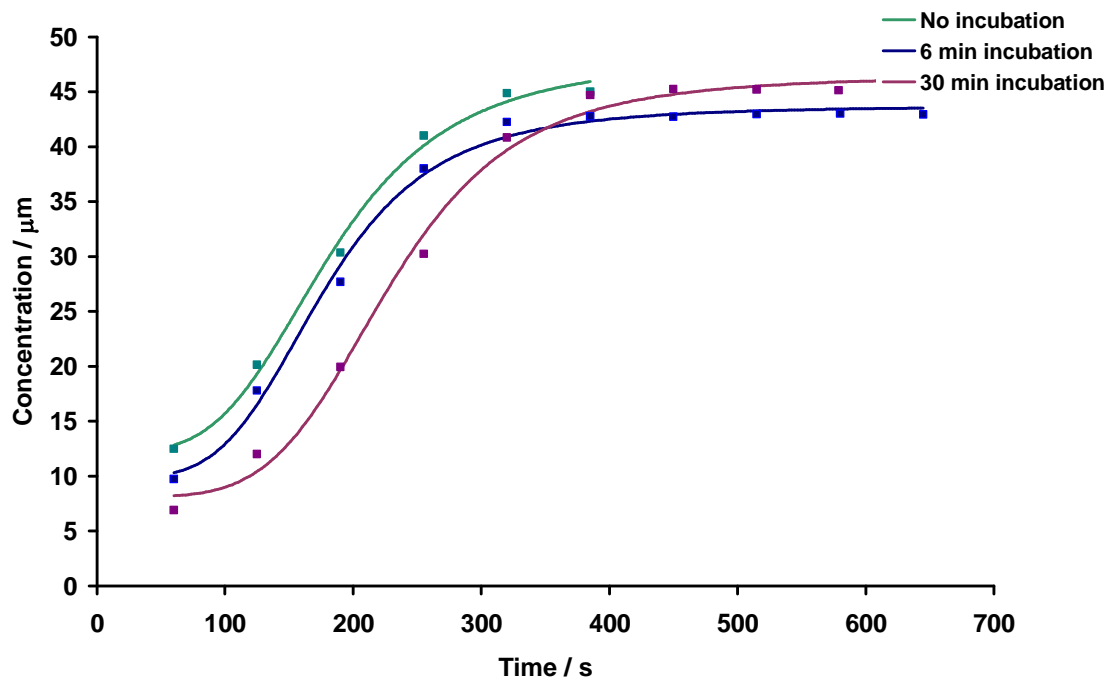

**Fig. 84.** Formation of MbCO over time after addition of  $60 \mu\text{M}$  solutions of  $[\text{NEt}_4][\{\text{Cr}(\text{CO})_5\}_2(\mu\text{-Br})]$  after incubated in DMSO for various time periods to an aqueous solution containing deoxy-myoglobin at pH 7.4.

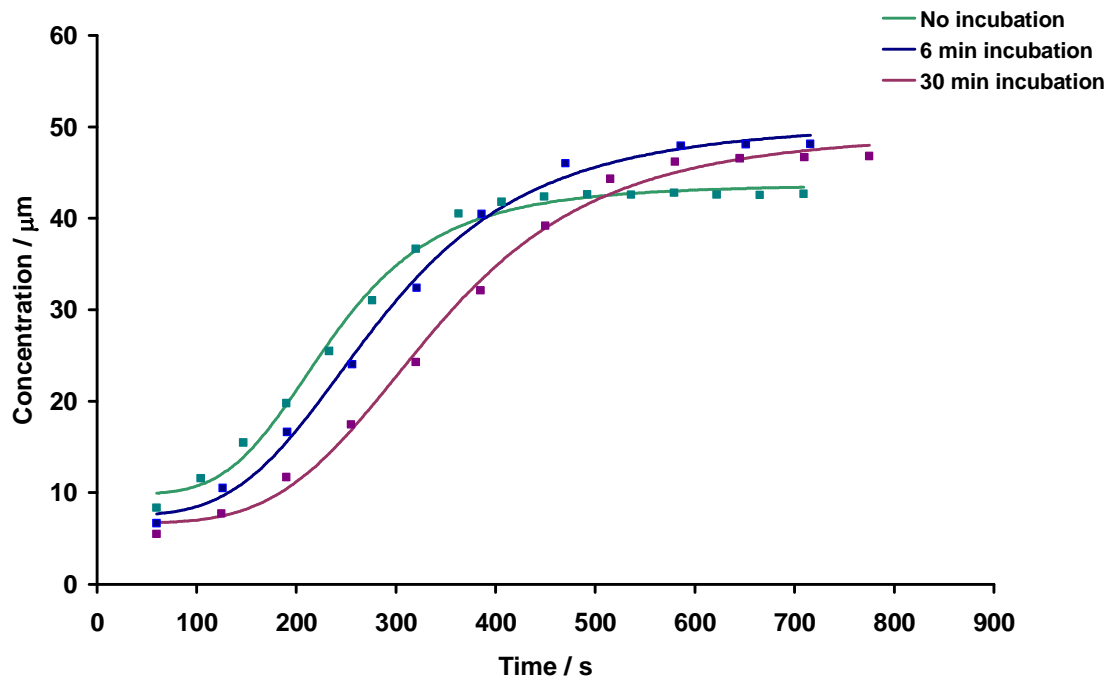

**Fig. 85.** Formation of MbCO over time after addition of  $40 \mu\text{M}$  solutions of  $[\text{NEt}_4][\{\text{Cr}(\text{CO})_5\}_2(\mu\text{-Br})]$  after incubated in DMSO for various time periods to an aqueous solution containing deoxy-myoglobin at pH 7.4.

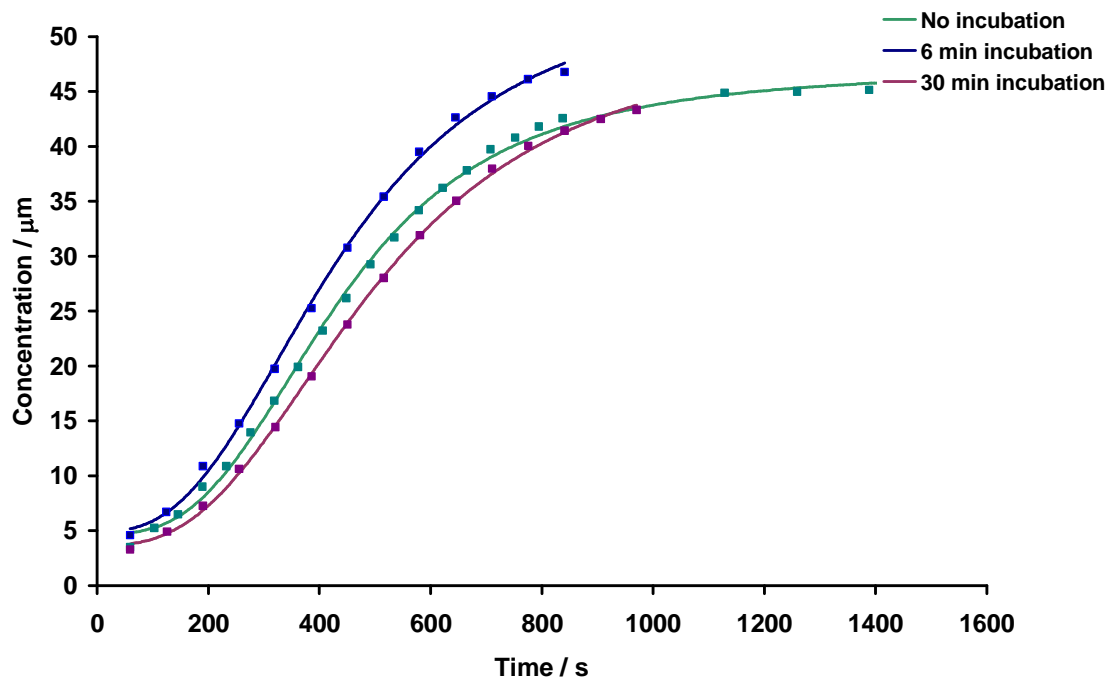

**Fig. 86.** Formation of MbCO over time after addition of 40  $\mu\text{M}$  solutions of  $[\text{NEt}_4][\{\text{Cr}(\text{CO})_5\}_2(\mu\text{-Br})]$  after incubated in DMSO for various time periods to an aqueous solution containing deoxy-myoglobin at pH 7.4.

### 1.23. $\text{Cr}(=\text{C}(\text{OCH}_3)\text{CH}_3)(\text{CO})_5$

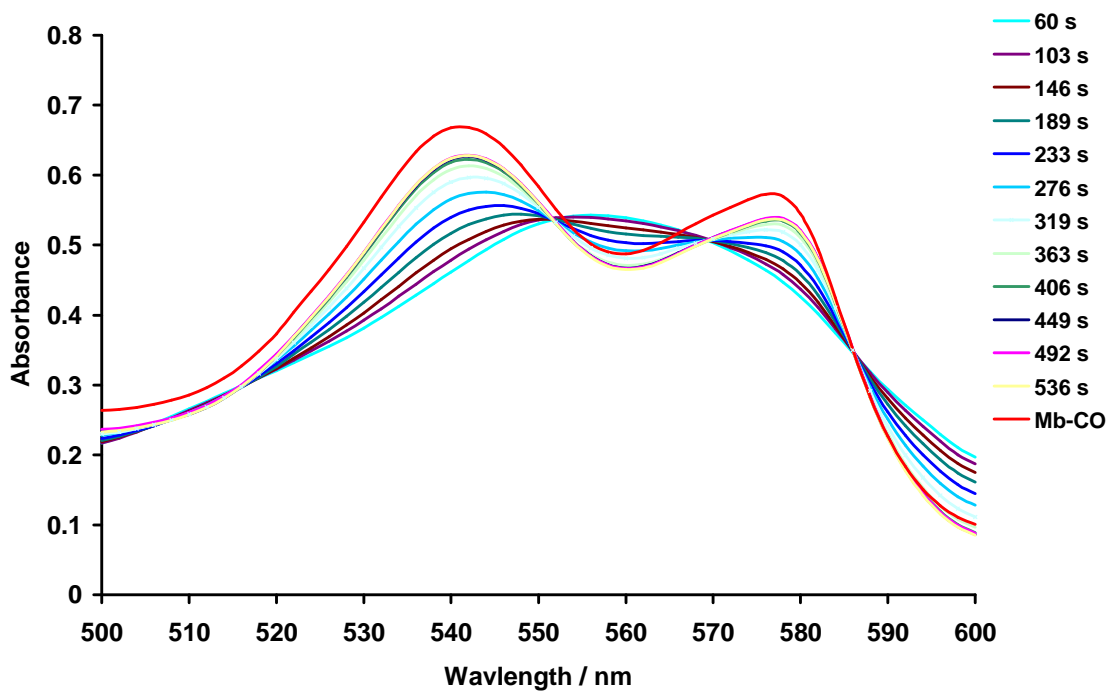

**Fig. 87.** The changes in the UV spectrum of myoglobin as CO is released from  $\text{Cr}(=\text{C}(\text{OCH}_3)\text{CH}_3)(\text{CO})_5$  (60 μm).

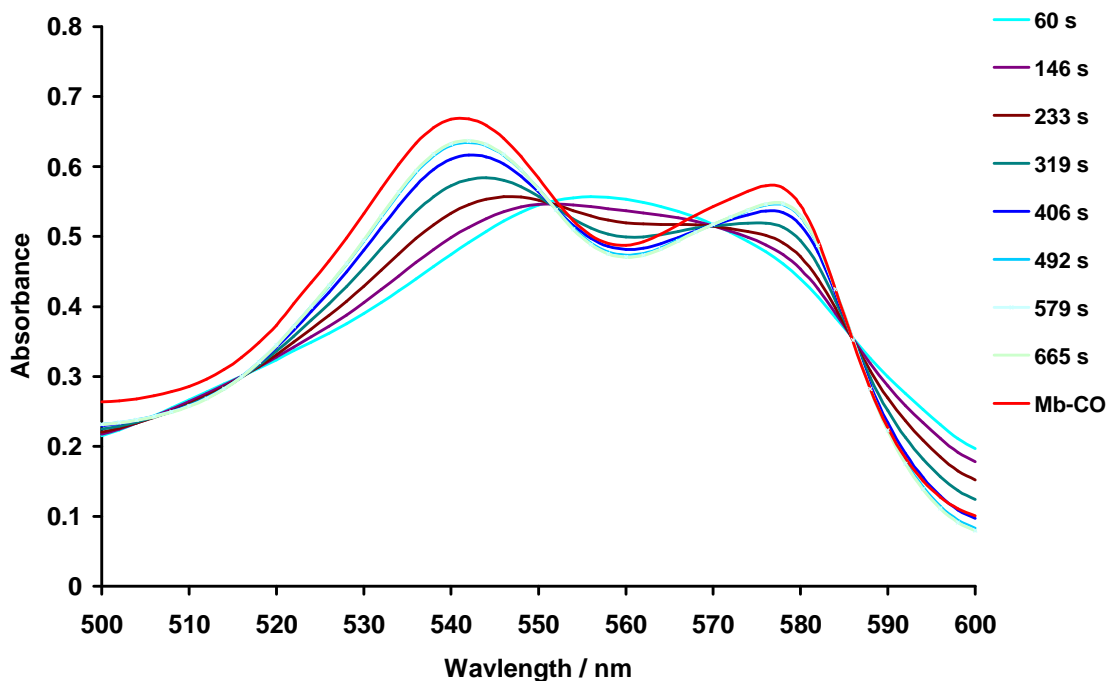

**Fig. 88.** The changes in the UV spectrum of myoglobin as CO is released from  $\text{Cr}(=\text{C}(\text{OCH}_3)\text{CH}_3)(\text{CO})_5$  (40 μm).

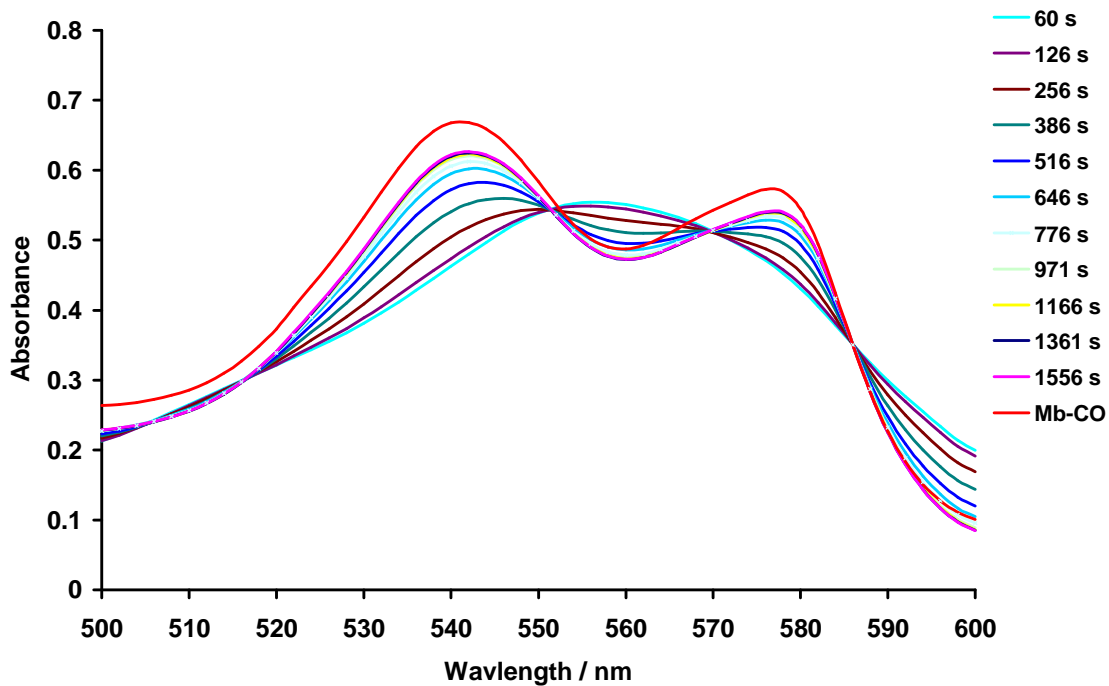

**Fig. 89.** The changes in the UV spectrum of myoglobin as CO is released from  $\text{Cr}(=\text{C}\{\text{OCH}_3\}\text{CH}_3)(\text{CO})_5$  ( $20\mu\text{m}$ ).

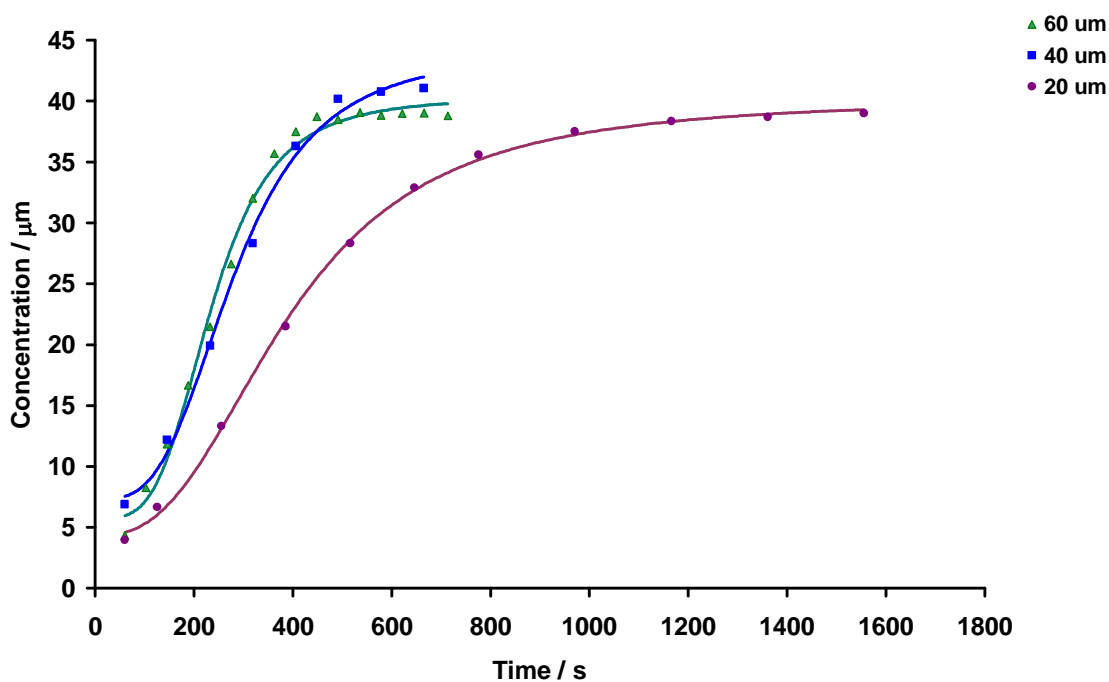

**Fig 90.** Formation of MbCO over time after addition of 60  $\mu\text{M}$ , 40 $\mu\text{M}$  and 20 $\mu\text{M}$  of  $\text{Cr}(=\text{C}\{\text{OCH}_3\}\text{CH}_3)(\text{CO})_5$  in DMSO to an aqueous solution containing deoxy-myoglobin at pH 7.4.



### 1.24. $\text{Mo}(=\text{C}\{\text{OCH}_3\}\text{CH}_3)(\text{CO})_5$

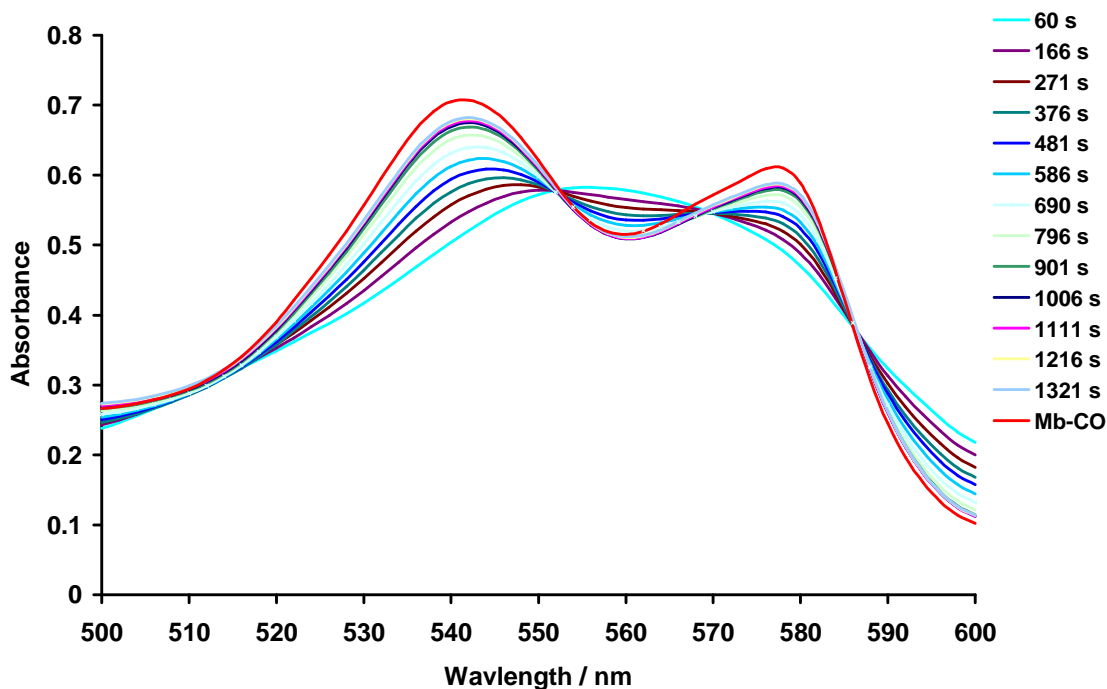

**Fig. 91.** The changes in the UV spectrum of myoglobin as CO is released from  $\text{Mo}(=\text{C}\{\text{OCH}_3\}\text{CH}_3)(\text{CO})_5$  ( $60\mu\text{m}$ ).

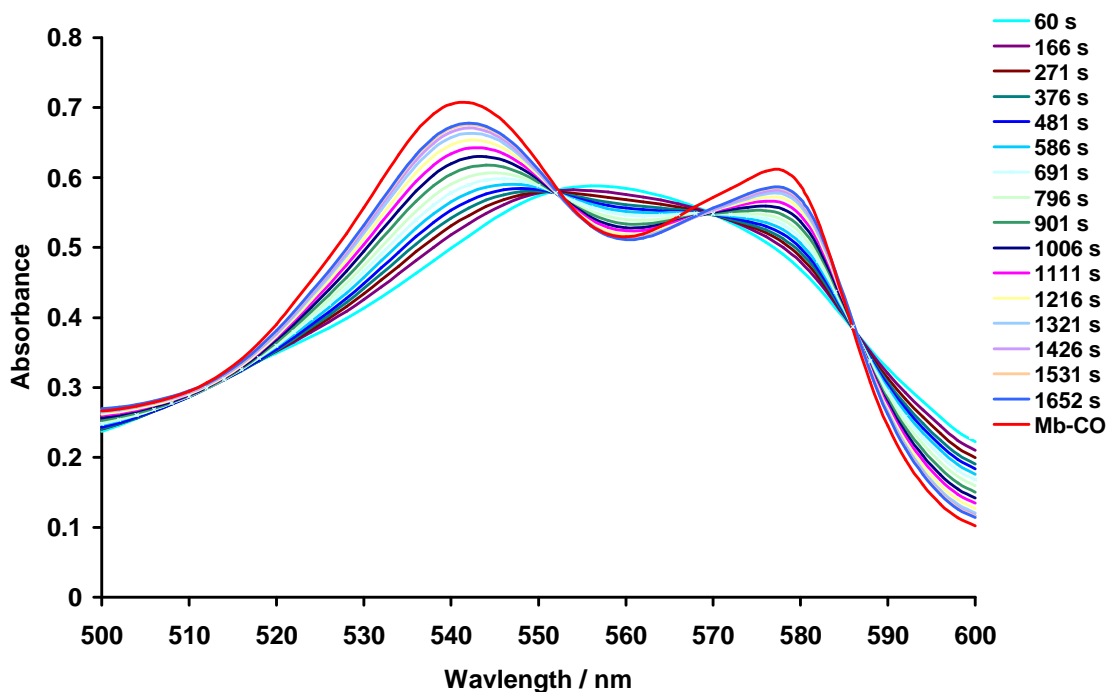

**Fig. 92.** The changes in the UV spectrum of myoglobin as CO is released from  $\text{Mo}(=\text{C}\{\text{OCH}_3\}\text{CH}_3)(\text{CO})_5$  ( $40\mu\text{m}$ ).

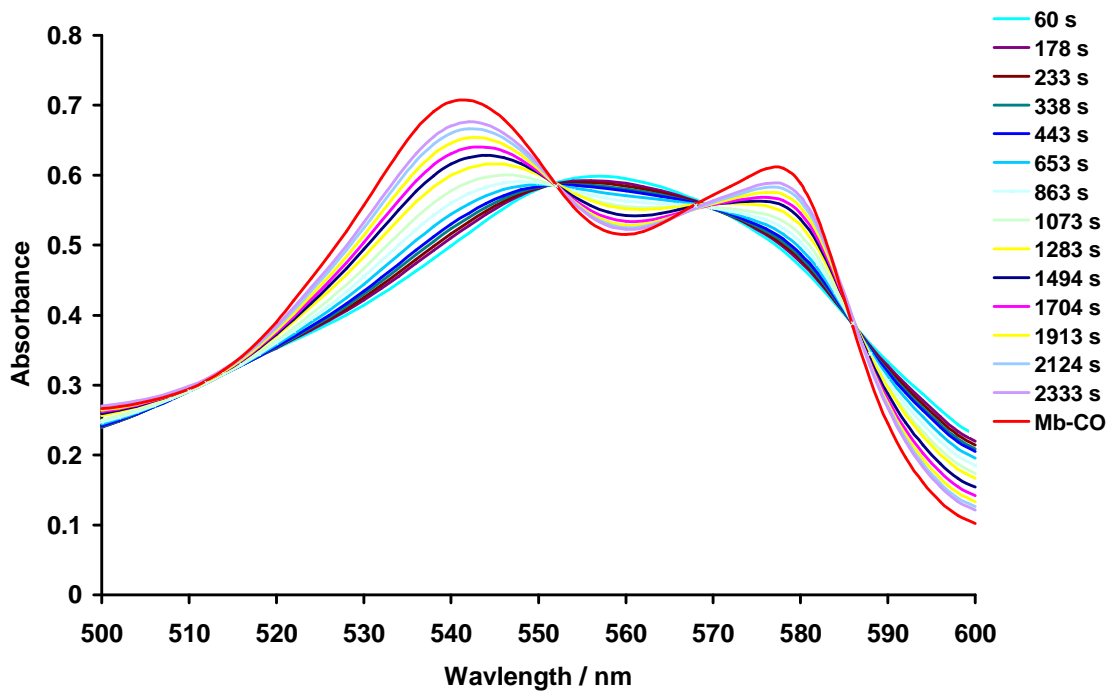

**Fig. 93.** The changes in the UV spectrum of myoglobin as CO is released from  $\text{Mo}(=\text{C}\{\text{OCH}_3\}\text{CH}_3)(\text{CO})_5$  ( $20\mu\text{m}$ ).

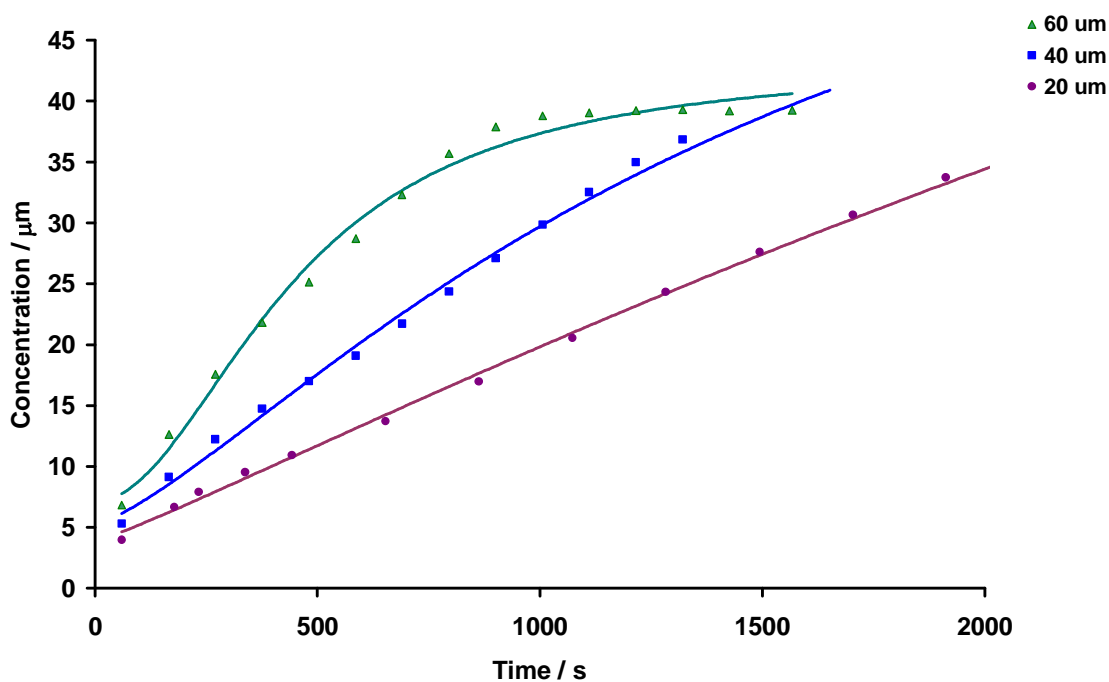

**Fig 94.** Formation of MbCO over time after addition of 60  $\mu\text{M}$ , 40 $\mu\text{M}$  and 20 $\mu\text{M}$  of  $\text{Mo}(=\text{C}\{\text{OCH}_3\}\text{CH}_3)(\text{CO})_5$  in DMSO to an aqueous solution containing deoxy-myoglobin at pH 7.4.

### 1.25. $W(=C\{OCH_3\}CH_3)(CO)_5$

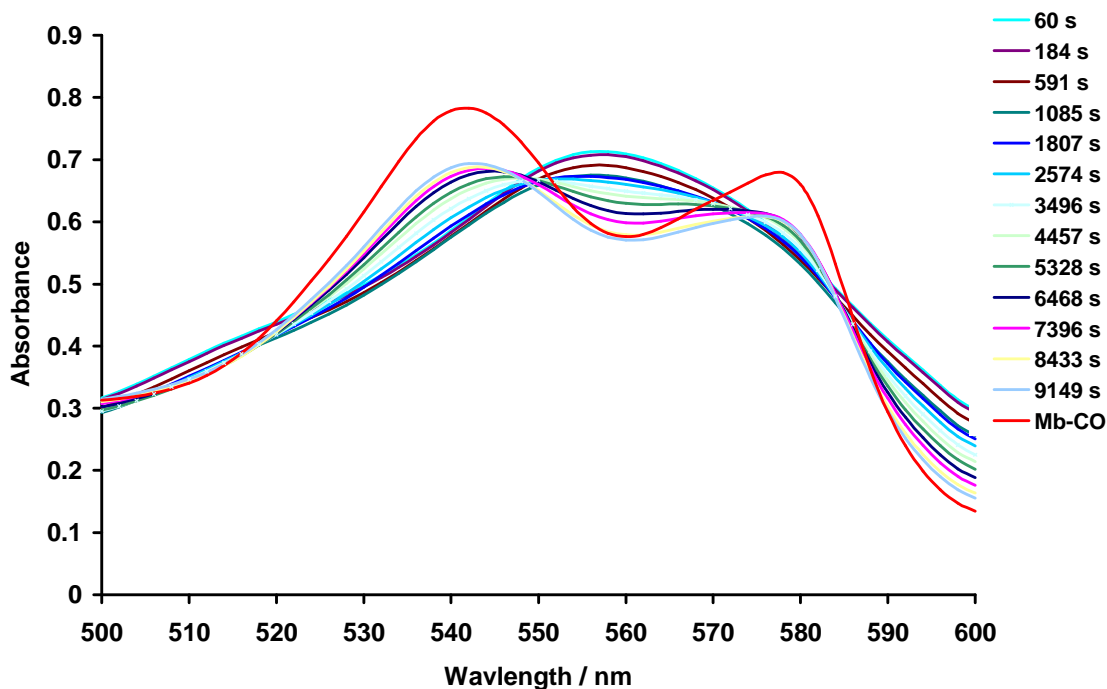

**Fig. 95.** The changes in the UV spectrum of myoglobin as CO is released from  $W(=C\{OCH_3\}CH_3)(CO)_5$  ( $60\mu\text{m}$ ).

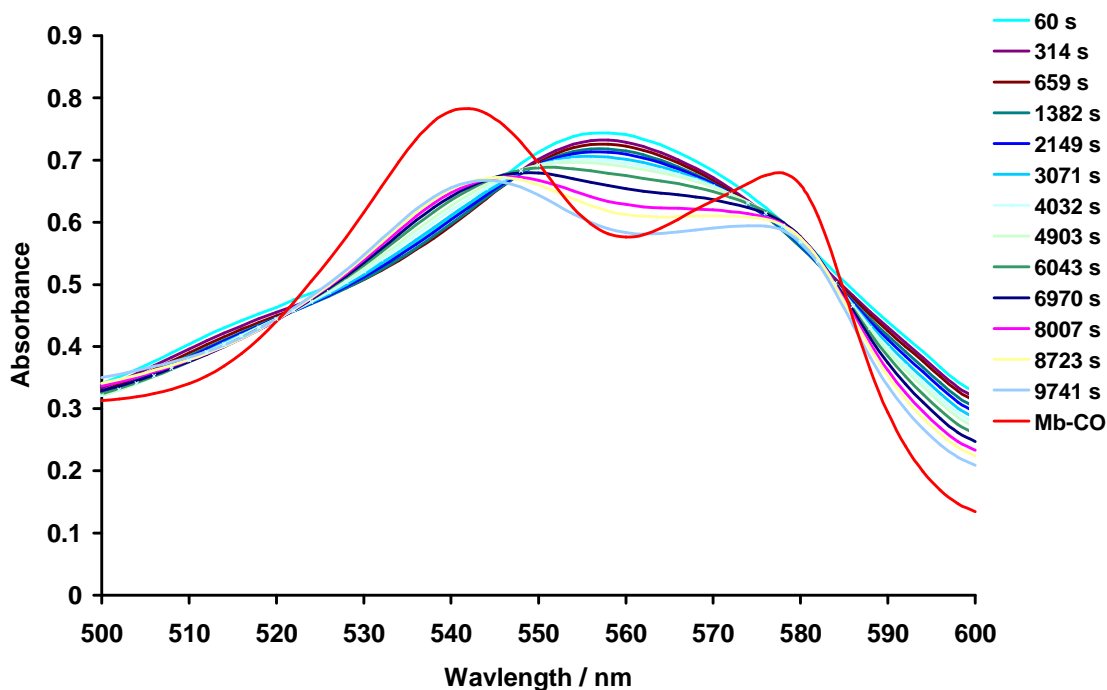

**Fig. 96.** The changes in the UV spectrum of myoglobin as CO is released from  $W(=C\{OCH_3\}CH_3)(CO)_5$  ( $40\mu\text{m}$ ).

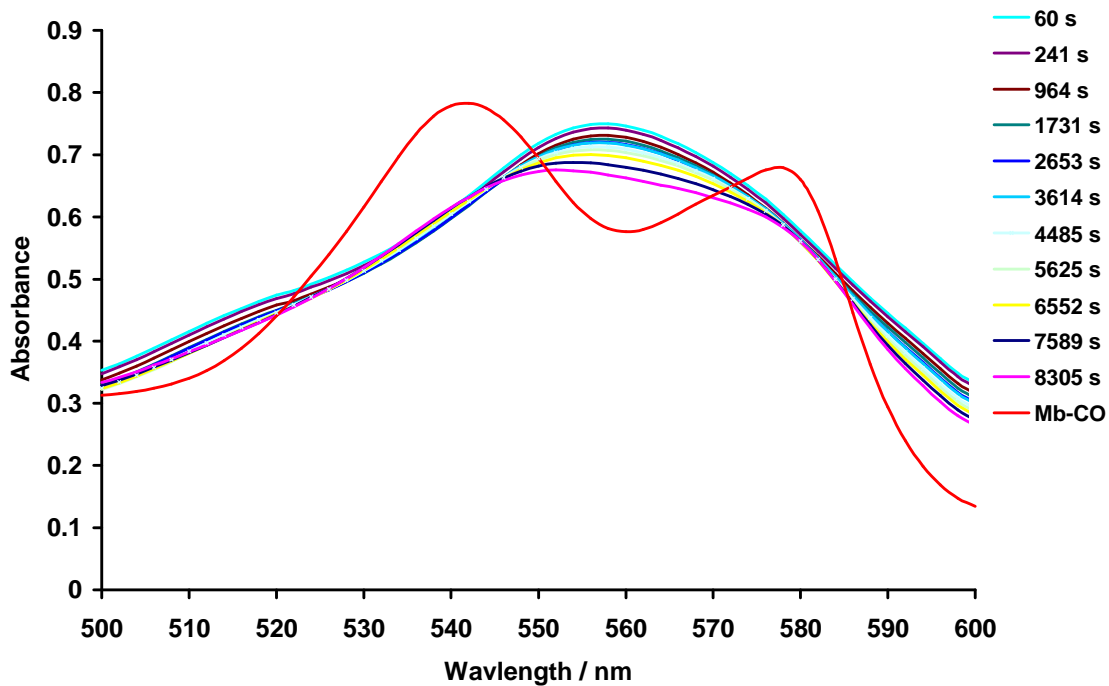

**Fig. 97.** The changes in the UV spectrum of myoglobin as CO is released from  $W(=C\{OCH_3\}CH_3)(CO)_5$  ( $20\mu\text{M}$ ).

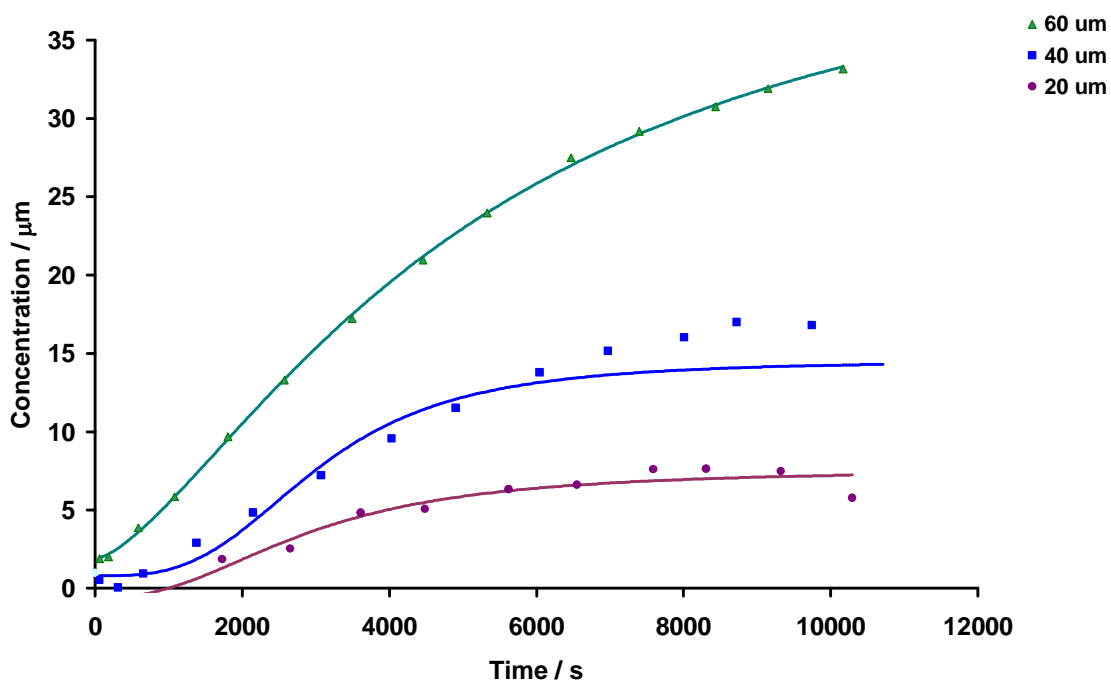

**Fig 98.** Formation of MbCO over time after addition of 60  $\mu\text{M}$ , 40 $\mu\text{M}$  and 20 $\mu\text{M}$  of  $W(=C\{OCH_3\}CH_3)(CO)_5$  in DMSO to an aqueous solution containing deoxy-myoglobin at pH 7.4.

### 1.26. $[\text{NEt}_4][\text{MoI}_3(\text{CO})_4]$

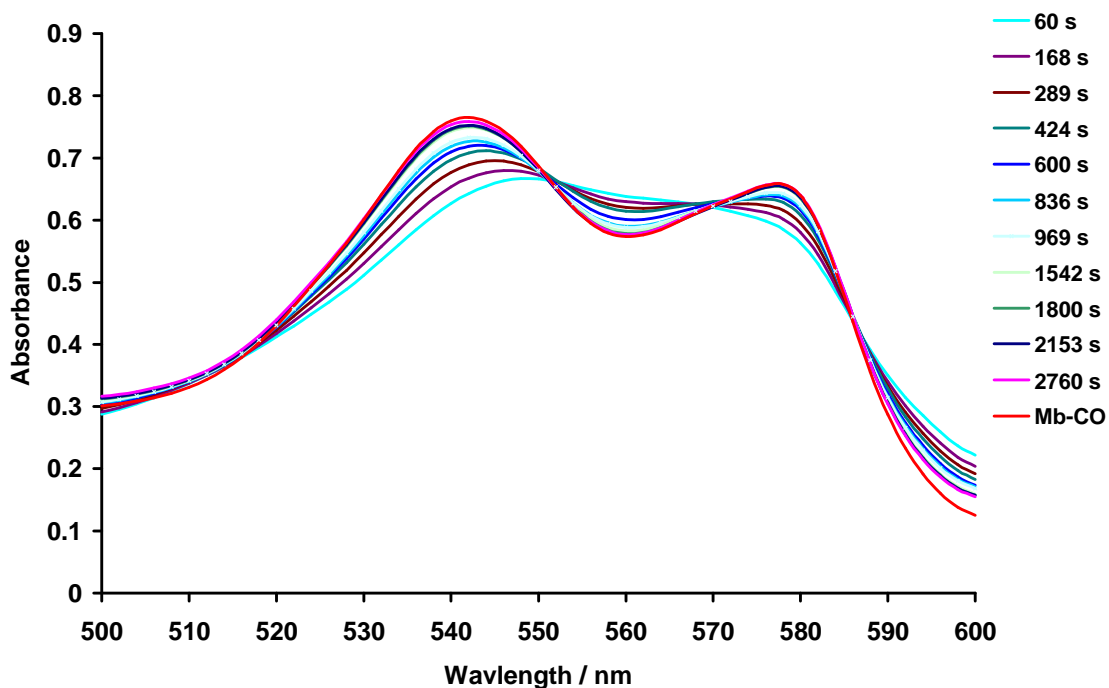

**Fig. 99.** The changes in the UV spectrum of myoglobin as CO is released from  $[\text{NEt}_4][\text{MoI}_3(\text{CO})_4]$  (60 μm).

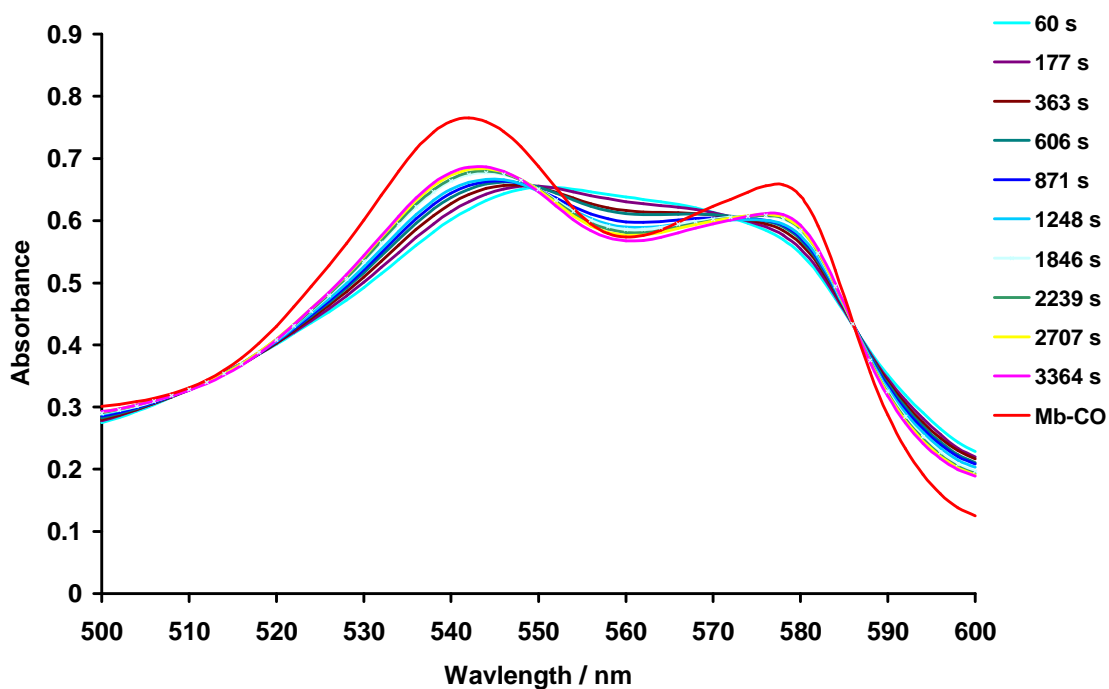

**Fig. 100.** The changes in the UV spectrum of myoglobin as CO is released from  $[\text{NEt}_4][\text{MoI}_3(\text{CO})_4]$  (40 μm).

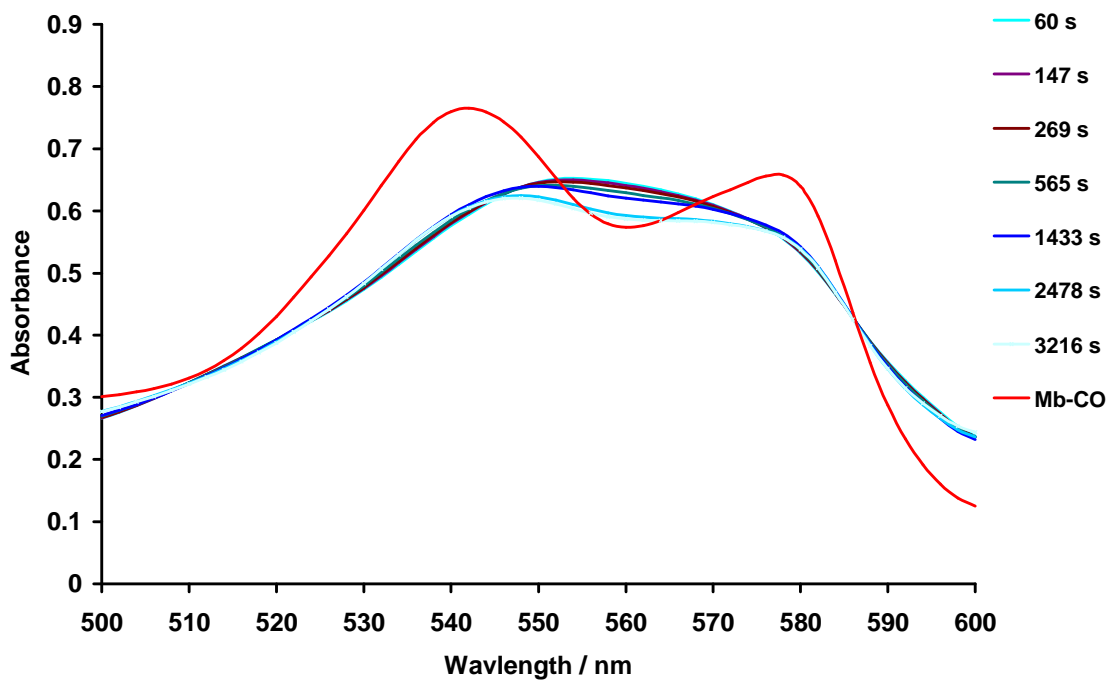

**Fig. 101.** The changes in the UV spectrum of myoglobin as CO is released from  $[\text{NEt}_4][\text{MoI}_3(\text{CO})_4]$  ( $20\mu\text{m}$ ).

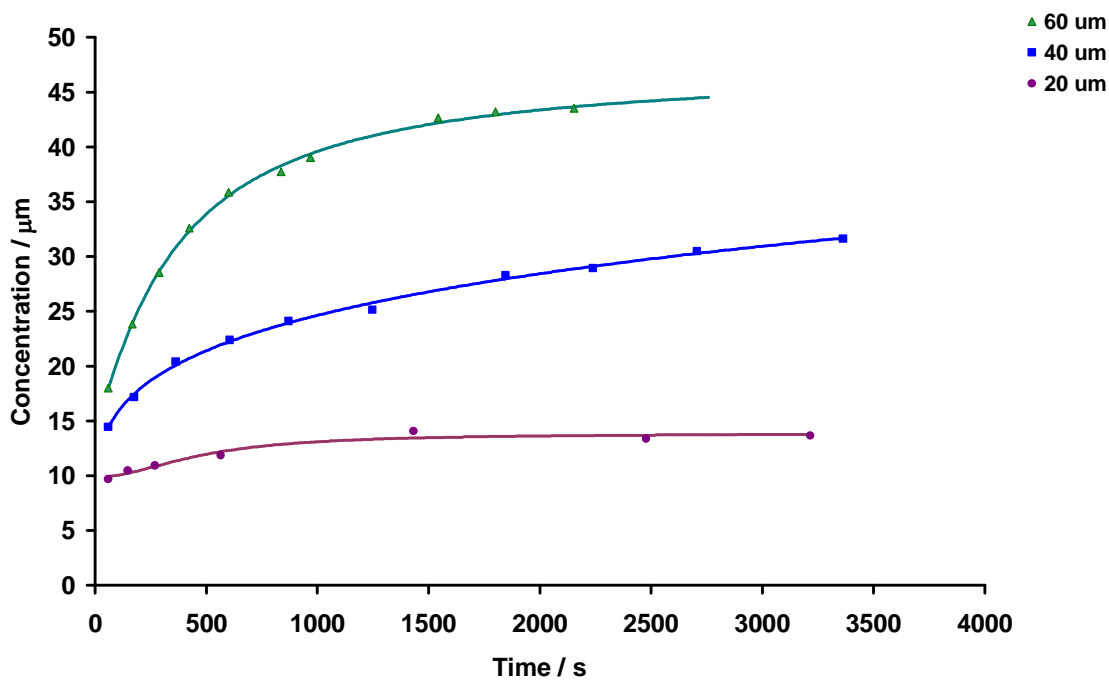

**Fig 102.** Formation of MbCO over time after addition of  $60\mu\text{M}$ ,  $40\mu\text{M}$  and  $20\mu\text{M}$  of  $[\text{NEt}_4][\text{MoI}_3(\text{CO})_4]$  in DMSO to an aqueous solution containing deoxy-myoglobin at pH 7.4.

### 1.27. $[\text{NEt}_4][\text{Wl}_3(\text{CO})_4]$

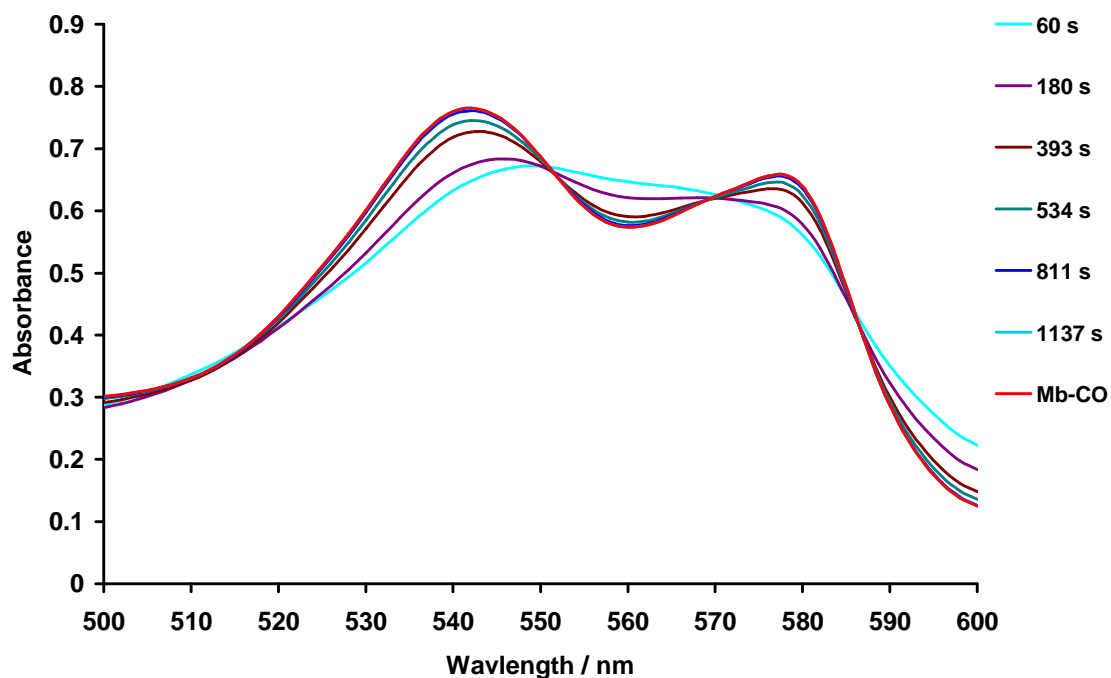

**Fig. 103.** The changes in the UV spectrum of myoglobin as CO is released from  $[\text{NEt}_4][\text{Wl}_3(\text{CO})_4]$  ( $60 \mu\text{m}$ ).

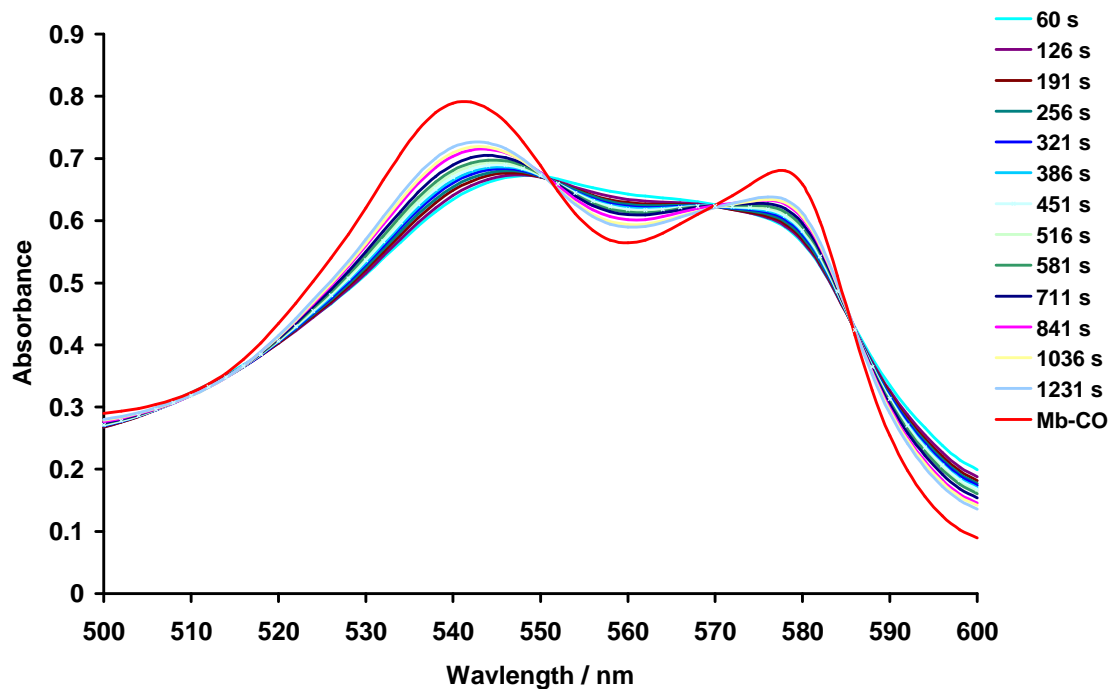

**Fig. 104.** The changes in the UV spectrum of myoglobin as CO is released from  $[\text{NEt}_4][\text{Wl}_3(\text{CO})_4]$  ( $40 \mu\text{m}$ ).

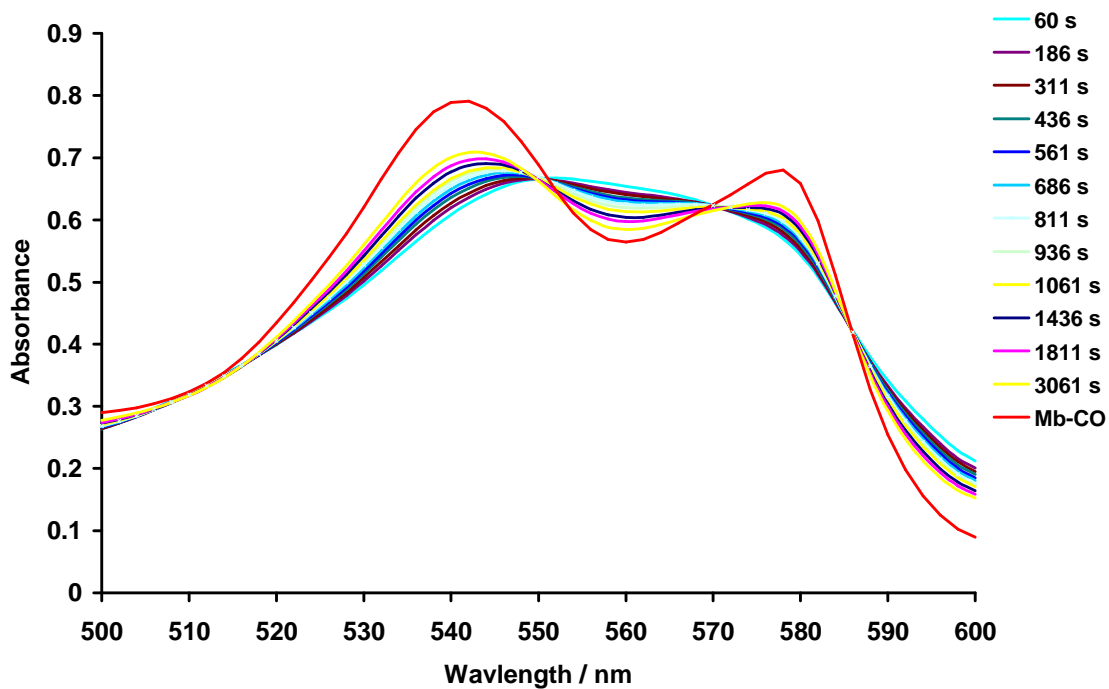

**Fig. 105.** The changes in the UV spectrum of myoglobin as CO is released from  $[\text{NEt}_4][\text{WI}_3(\text{CO})_4]$  (20  $\mu\text{m}$ ).

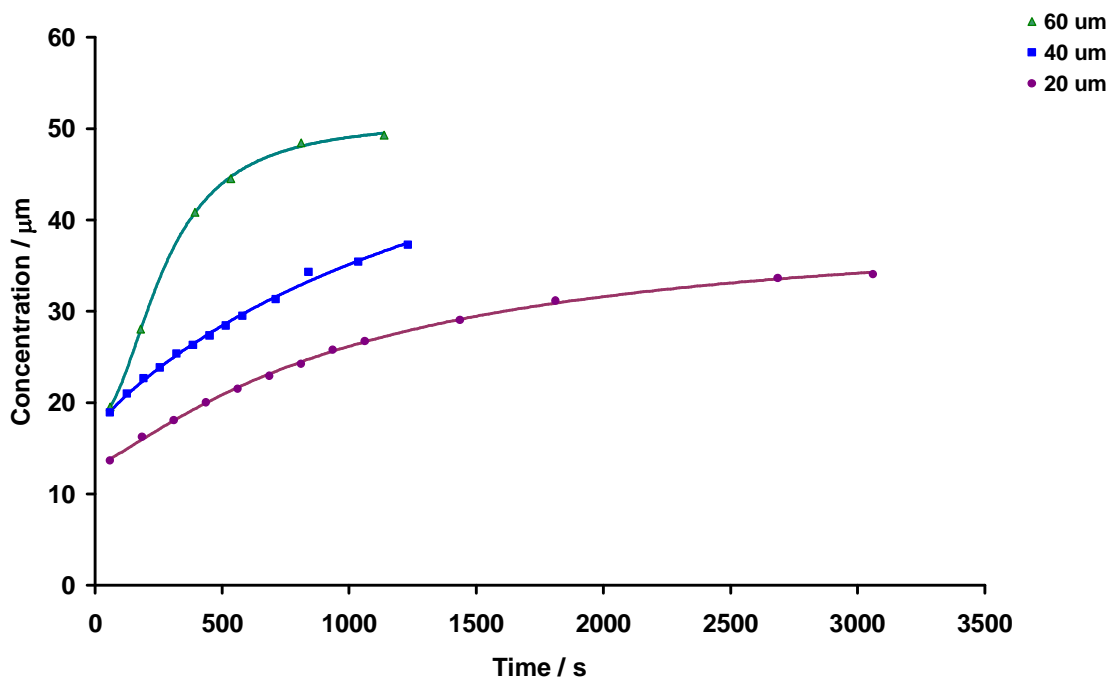

**Fig 106.** Formation of MbCO over time after addition of 60  $\mu\text{M}$ , 40  $\mu\text{M}$  and 20  $\mu\text{M}$  of  $[\text{NEt}_4][\text{WI}_3(\text{CO})_4]$  in DMSO to an aqueous solution containing deoxy-myoglobin at pH 7.4.



### 1.28. $W(\kappa^2\text{-acac})_2(\text{CO})_3$

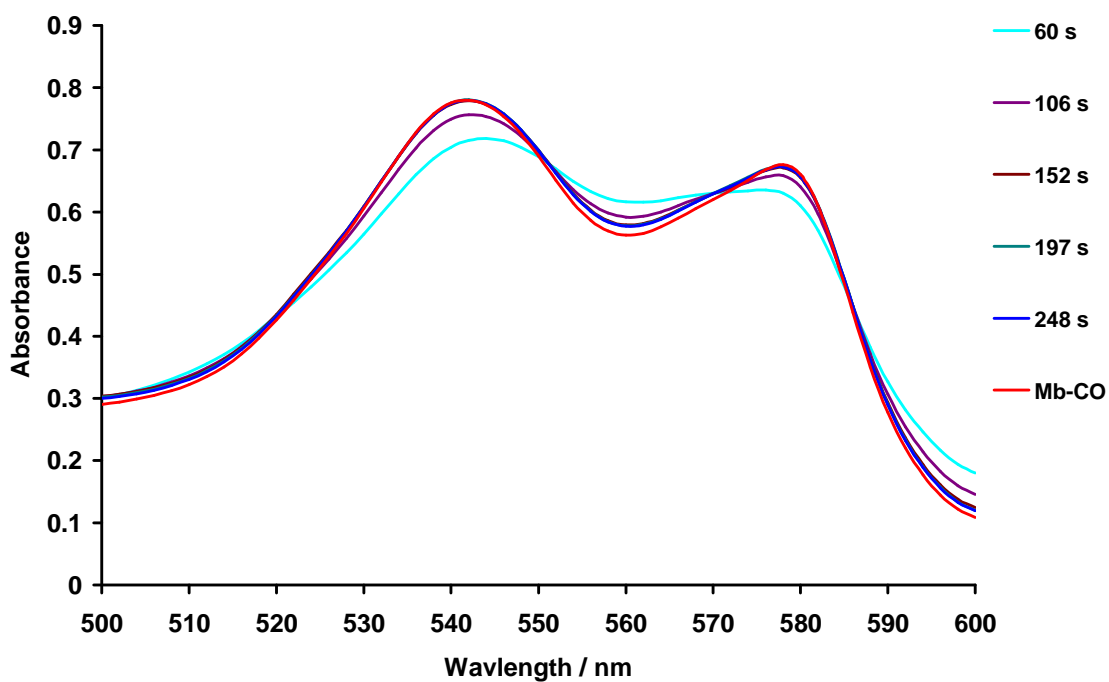

**Fig. 107.** The changes in the UV spectrum of myoglobin as CO is released from  $W(\kappa^2\text{-acac})_2(\text{CO})_3$  (60  $\mu\text{m}$ ).

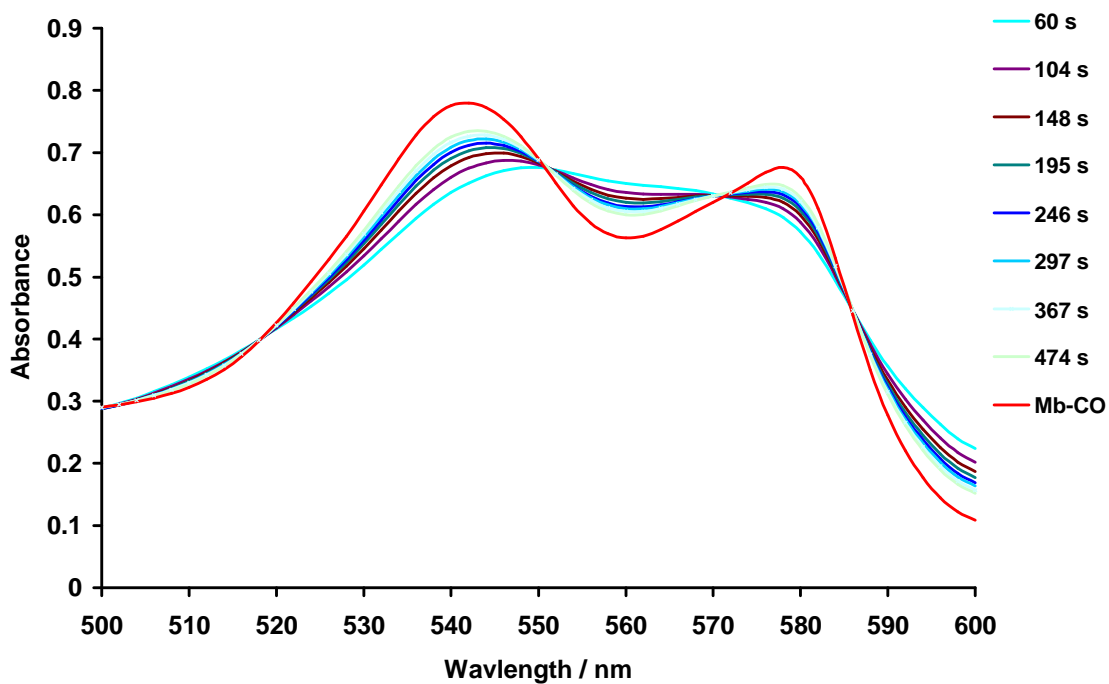

**Fig. 108.** The changes in the UV spectrum of myoglobin as CO is released from  $W(\kappa^2\text{-acac})_2(\text{CO})_3$  (40  $\mu\text{m}$ ).

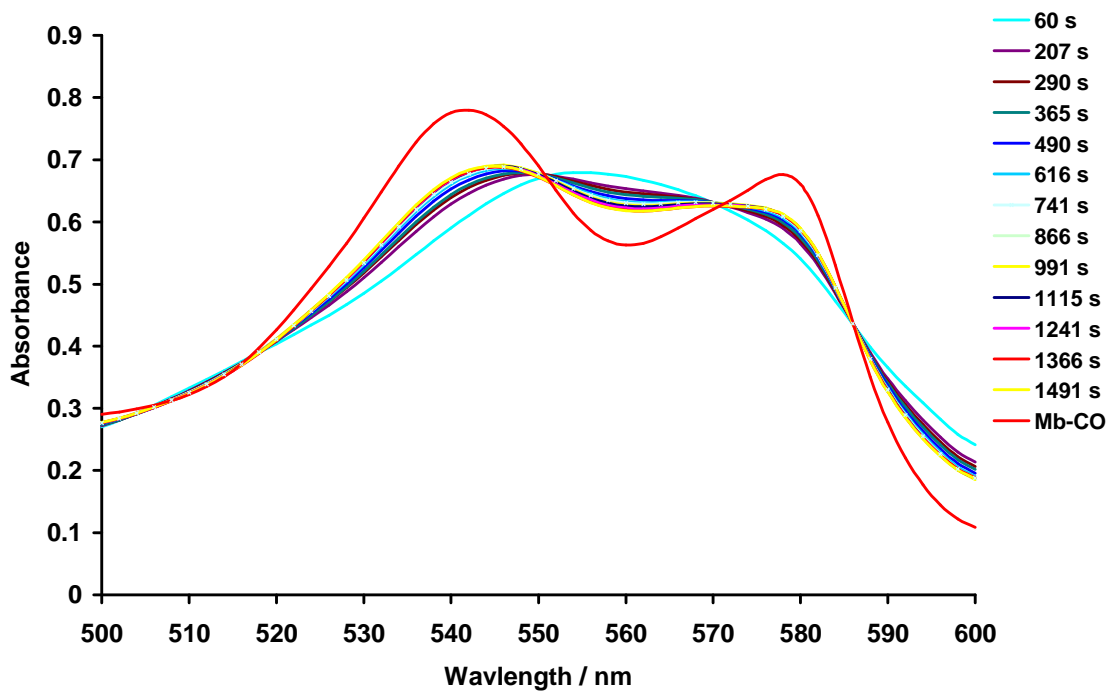

**Fig. 109.** The changes in the UV spectrum of myoglobin as CO is released from  $W(\kappa^2\text{-acac})_2(\text{CO})_3$  ( $20\mu\text{m}$ ).

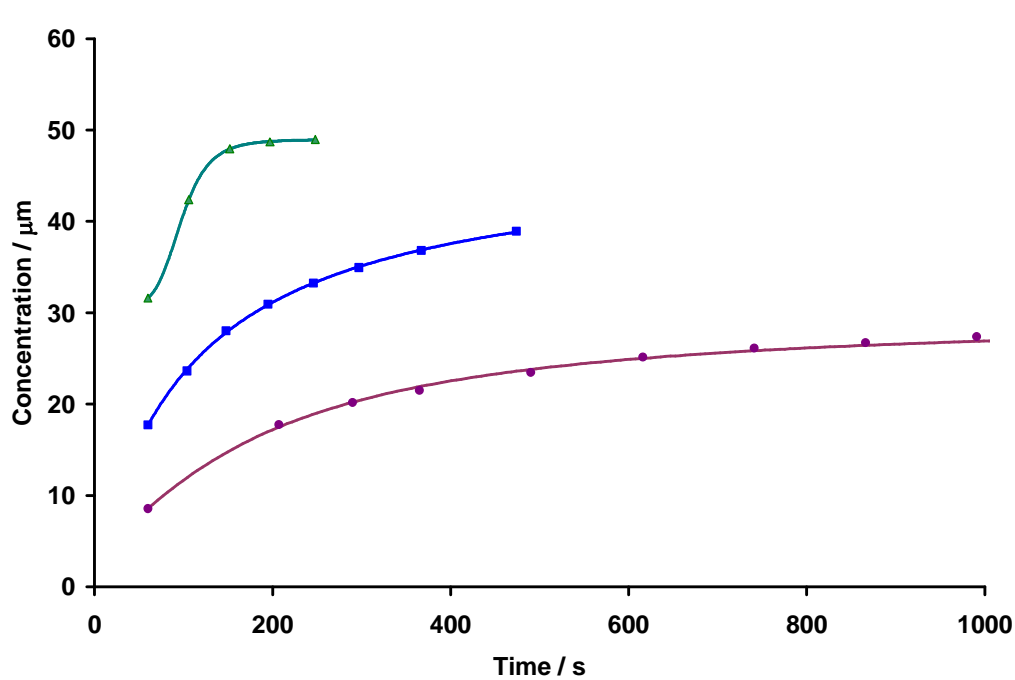

**Fig 110.** Formation of MbCO over time after addition of 60  $\mu\text{M}$ , 40 $\mu\text{M}$  and 20 $\mu\text{M}$  of  $W(\kappa^2\text{-acac})_2(\text{CO})_3$  in DMSO to an aqueous solution containing deoxy-myoglobin at pH 7.4.

## 2. Degradation Tests

### 2.1. Degradation test of $[\text{NEt}_4][\text{CrBr}(\text{CO})_5]$ in DCM

The degradation of  $[\text{NEt}_4][\text{CrBr}(\text{CO})_5]$  in DCM solution was monitored over a period of several hours by IR spectroscopy. (Fig. 111). The characteristic CO bands of  $[\text{NEt}_4][\text{CrBr}(\text{CO})_5]$  was observed to decrease intensity over the period over several hours and the only new species observed was  $\text{Cr}(\text{CO})_6$ .

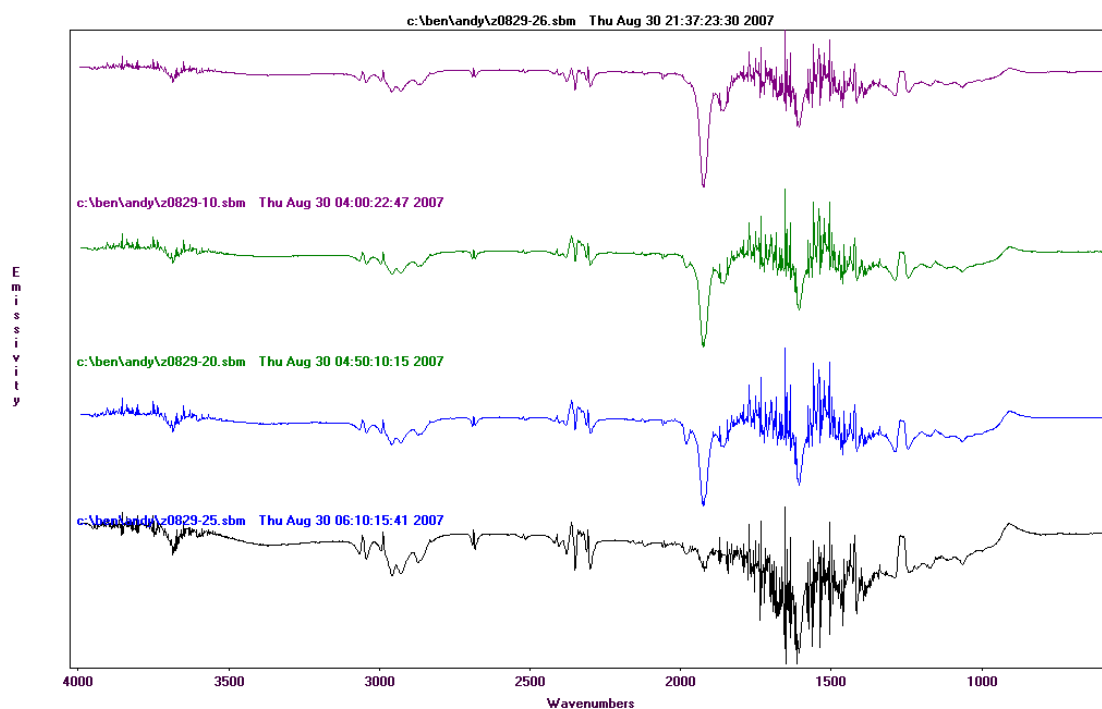

**Fig 111.** The decomposition of  $[\text{NEt}_4][\text{CrBr}(\text{CO})_5]$  in DCM

A few drops of water were added into a DCM solution of  $[\text{NEt}_4][\text{CrBr}(\text{CO})_5]$  and IR spectra recorded regularly over a 30 minute period (Fig. 112). The formation of  $\text{Cr}(\text{CO})_6$  was far more rapid in this instance with a strong band for  $\text{Cr}(\text{CO})_6$  being observed.

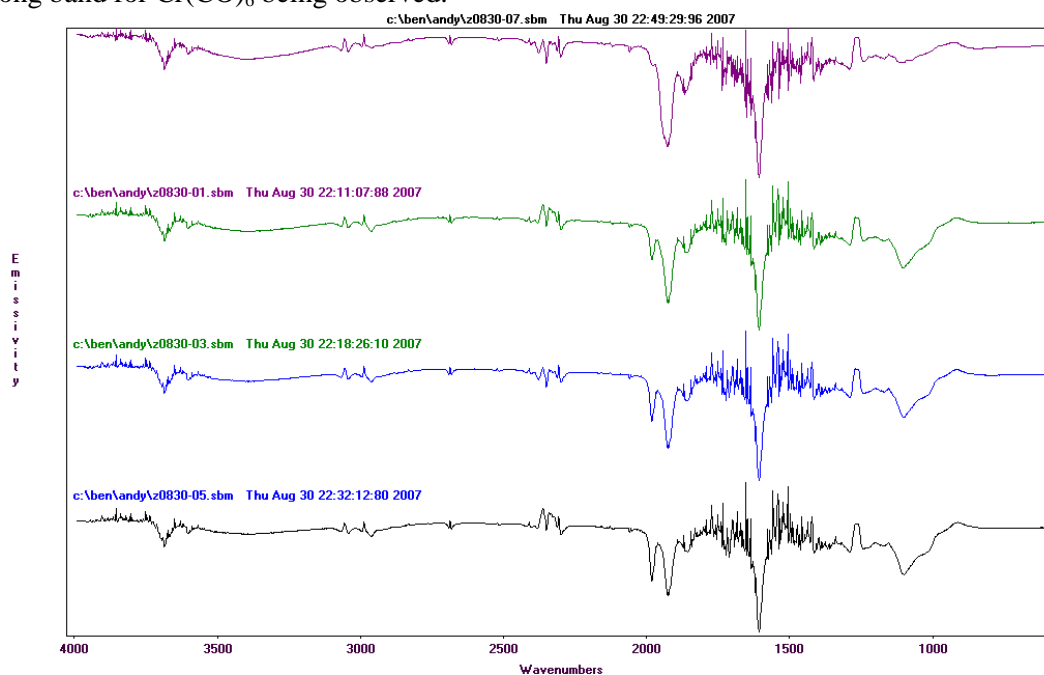

**Fig 112.** The degradation of  $[\text{NEt}_4][\text{Cr}(\text{CO})_5\text{Br}]$  in DCM triggered by water over 30 min

The reaction was monitored for a further 30 minutes (**Fig 113**) by which time  $\text{Cr}(\text{CO})_6$  was the major carbonyl-containing product.

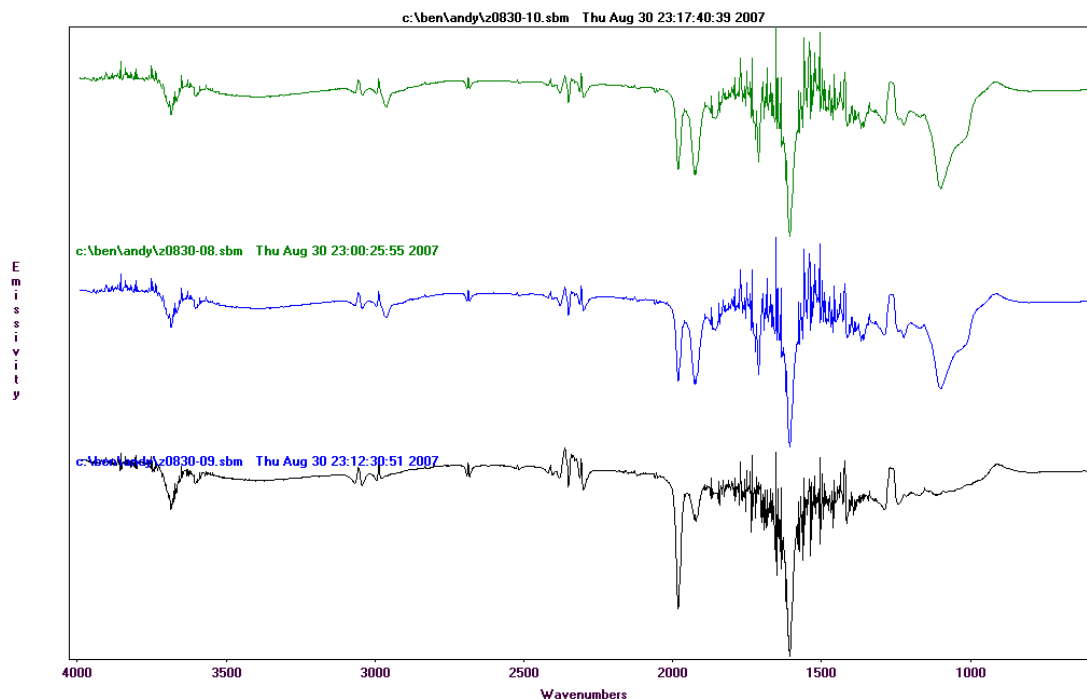

**Fig 113.** The degradation of  $[\text{NEt}_4][\text{Cr}(\text{CO})_5\text{Br}]$  in DCM triggered by water in next 30 min

The decomposition of  $[\text{NEt}_4][\text{CrBr}(\text{CO})_5]$  reaction was repeated and IR spectra acquired at *ca.* 2 min intervals. This allowed for the intermediate  $[\text{NEt}_4][(\text{Cr}(\text{CO})_5)_2(\mu\text{-Br})]$ , and its subsequent conversion to  $\text{Cr}(\text{CO})_6$ , to be observed (Figure 2 main manuscript). Both the loss of the  $[\text{NEt}_4][(\text{Cr}(\text{CO})_5)_2(\mu\text{-Cl})]$  and the growth of  $\text{Cr}(\text{CO})_6$  could be modeled using the SOLVER routine in Excel as obeying first order kinetic with the loss of the  $[\text{NEt}_4][(\text{Cr}(\text{CO})_5)_2(\mu\text{-Cl})]$  and growth of  $\text{Cr}(\text{CO})_6$  having similar rate constants (**Fig. 114**).

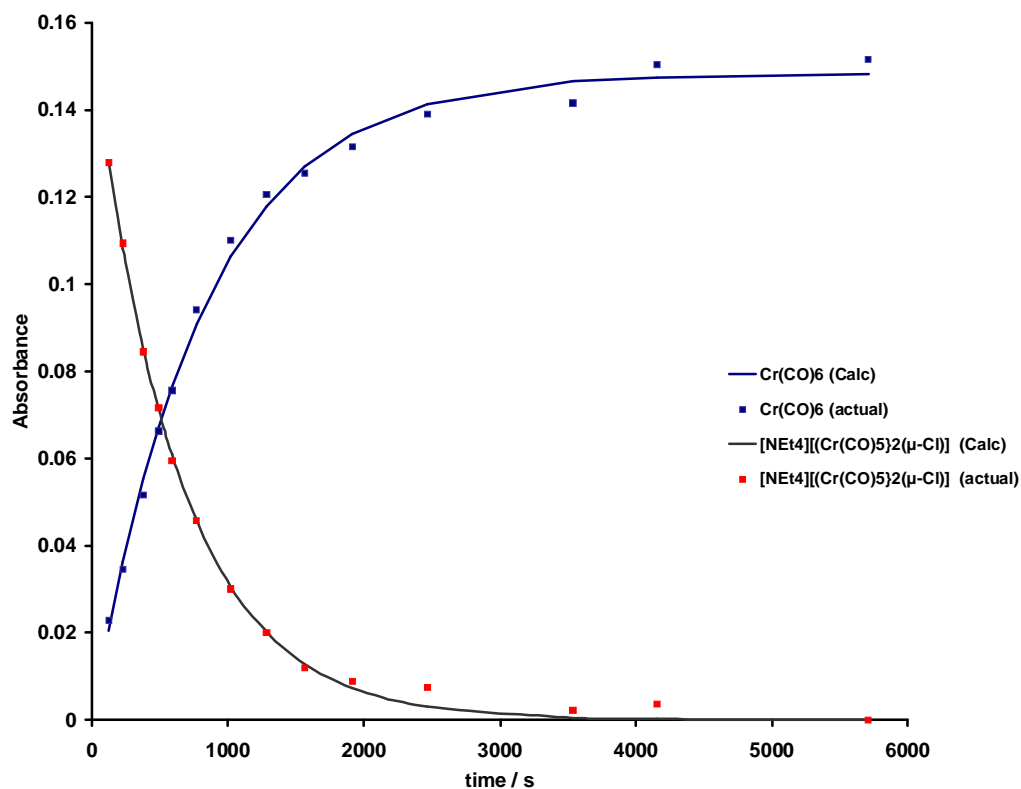

**Fig 114.** Loss of  $[\text{NEt}_4][(\text{Cr}(\text{CO})_5)_2(\mu\text{-Cl})]$  and growth of  $\text{Cr}(\text{CO})_6$  with fit to first order kinetics. Rate of loss of  $[\text{NEt}_4][(\text{Cr}(\text{CO})_5)_2(\mu\text{-Cl})] = 1.60 \times 10^{-3} \text{ s}^{-1}$ , rate of formation of  $\text{Cr}(\text{CO})_6 = 1.24 \times 10^{-3} \text{ s}^{-1}$ .

The degradation tests were repeated under using degassed solvents (**Fig 115**) and oxygenated solvents (**Fig 116**). In both cases the rate of growth of  $\text{Cr}(\text{CO})_6$  was fitted to first order kinetics and showed similar rate constants. The reaction of  $[\text{NEt}_4][\text{Cr}(\text{CO})_5\text{Br}]$  with  $[\text{Fe}(\eta^5\text{-C}_5\text{H}_5)_2][\text{PF}_6]$  in DCM resulted in the formation of  $[\text{Cr}(\text{CO})_5\text{Br}]$  (**Fig 117**). Again the rate of formation of  $\text{Cr}(\text{CO})_6$  showed little variance and bands due to  $[\text{Cr}(\text{CO})_5\text{Br}]$  were only observed in the presence of the ferrocenium salt.

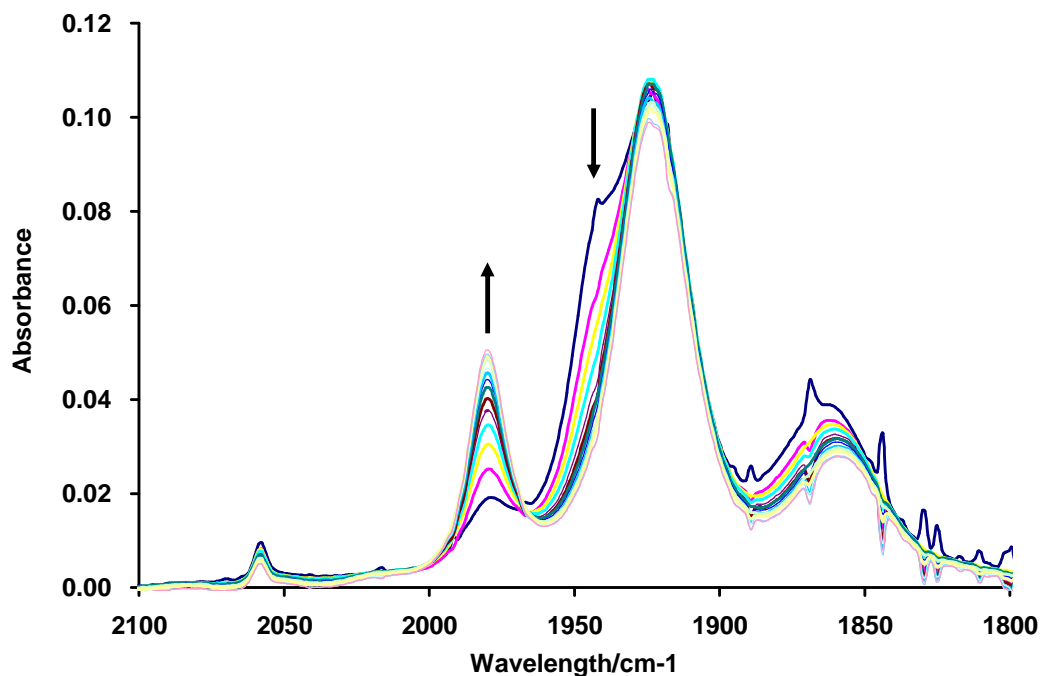

**Fig 115.** The degradation of  $[\text{NEt}_4][\text{Cr}(\text{CO})_5\text{Br}]$  in DCM triggered by water using degassed solvents. Rate of formation of  $\text{Cr}(\text{CO})_6 = (4.63 \pm 0.54) \times 10^{-3} \text{ s}^{-1}$ .

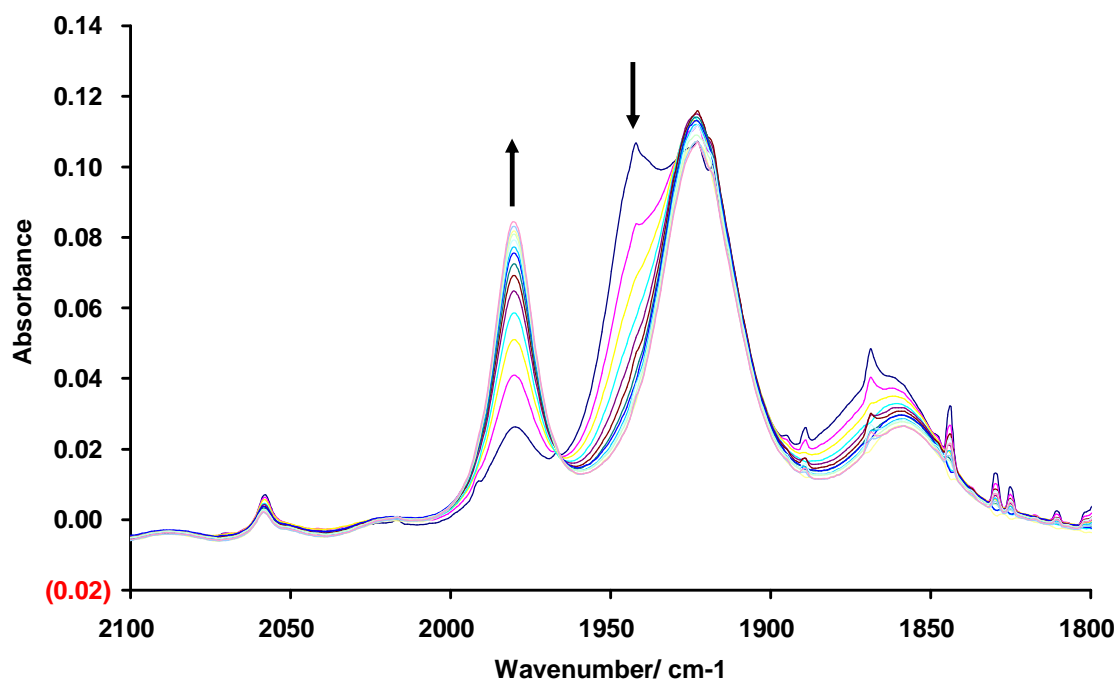

**Fig 116.** The degradation of  $[\text{NEt}_4][\text{Cr}(\text{CO})_5\text{Br}]$  in DCM triggered by water using oxygenated solvents. Rate of formation of  $\text{Cr}(\text{CO})_6 = (4.73 \pm 0.57) \times 10^{-3} \text{ s}^{-1}$ .

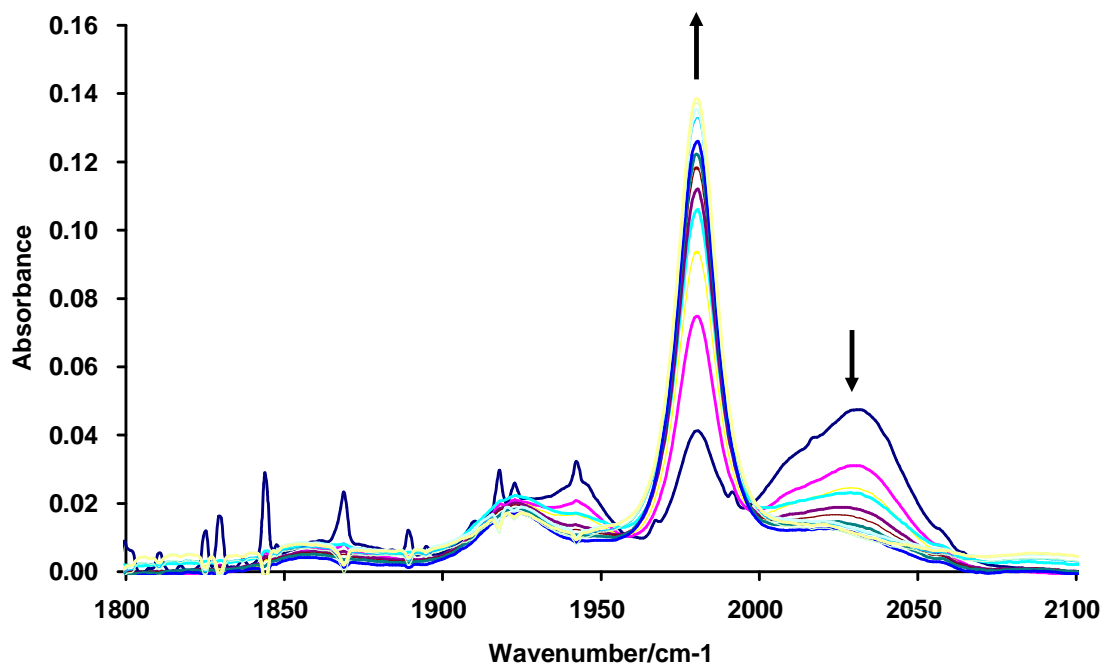

**Fig 117.** The degradation of  $[\text{NEt}_4][\text{Cr}(\text{CO})_5\text{Br}]$  in DCM in the presence of one equivalent of  $[\text{Fe}(\eta^5\text{-C}_5\text{H}_5)_2][\text{PF}_6]$ . Rate of formation of  $\text{Cr}(\text{CO})_6 = (5.52 \pm 0.66) \times 10^{-3} \text{ s}^{-1}$ .

## 2.2. Degradation test of $[\text{NEt}_4][\text{CrI}(\text{CO})_5]$ in methanol

The degradation tests were carried out in same fashion as the those in DCM as described in **Section 2.1**. To a freshly prepared methanol solution of  $[\text{NEt}_4][\text{CrI}(\text{CO})_5]$  a drop of water was added and the solution mixed. The resulting reaction was monitored by IR spectroscopy with spectra recorded every 10 minutes.

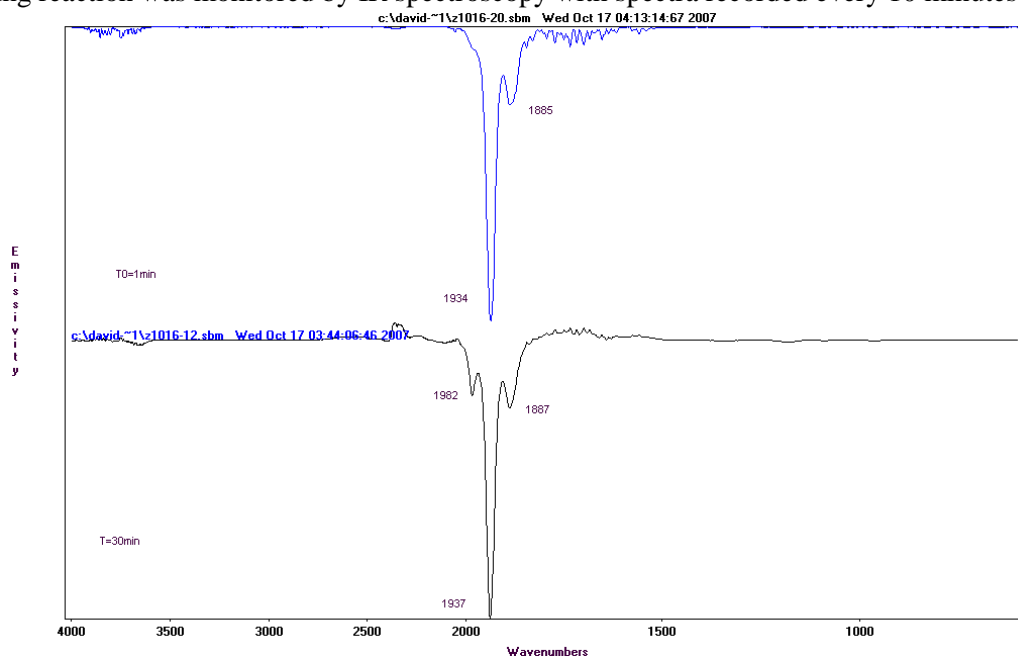

**Fig 118.** Spectrum recorded at  $t=0$  min and  $t=30$ min showing the formation of  $\text{Cr}(\text{CO})_6$

### 2.3. Independent Carbonylation of $[\text{NEt}_4][\text{Cr}(\text{CO})_5\text{I}]$ in methanol

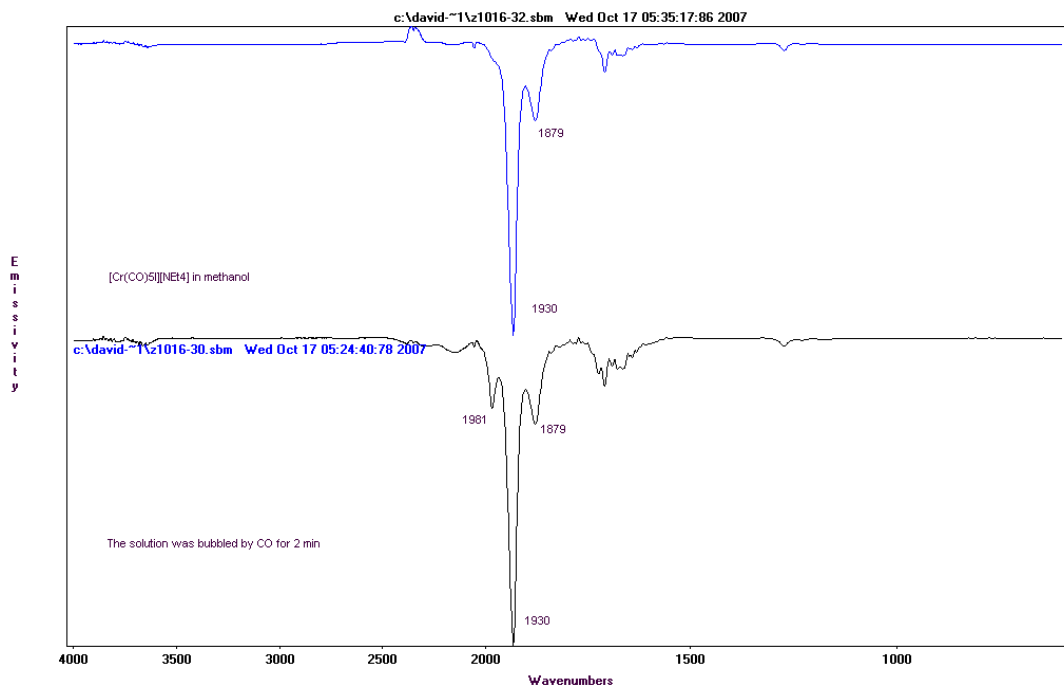

**Fig 119.** Independent Carbonylation of  $[\text{NEt}_4][\text{Cr}(\text{CO})_5\text{I}]$ .

A methanol solution of  $[\text{NEt}_4][\text{Cr}(\text{CO})_5\text{I}]$  was purged with CO for 3 minutes. After which time the IR spectra of the reaction mixture demonstrated that some  $\text{Cr}(\text{CO})_6$  had been formed. Further reaction with CO led to complete conversion to  $\text{Cr}(\text{CO})_6$  as the only carbonyl-containing product.



## 2.4. Reaction of $[\text{NEt}_4][\text{CrBr}(\text{CO})_5]$ and $[\text{NEt}_4][(\text{Cr}(\text{CO})_5)_2(\mu\text{-Br})]$ . With DMSO.

In a typical experiment 1 mg of  $[\text{NEt}_4][(\text{Cr}(\text{CO})_5)_2(\mu\text{-Br})]$  was dissolved in 1 mL of  $\text{CH}_2\text{Cl}_2$  and immediately afterwards a drop of DMSO was added. The reaction mixture was stirred at 20 °C for 30 seconds. The sample was loaded in a sealed IR cell and spectra recorded at intervals. The reaction with  $[\text{NEt}_4][\text{CrBr}(\text{CO})_5]$  was performed in an identical manner.

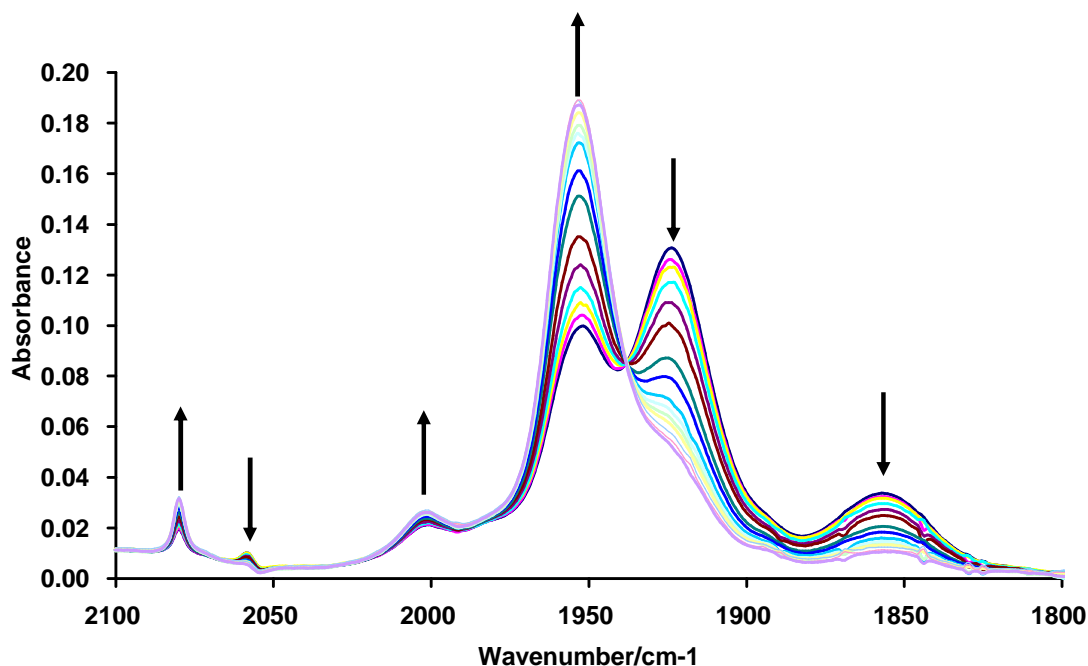

Fig 120. IR spectra illustrating the reaction of  $[\text{NEt}_4][(\text{Cr}(\text{CO})_5)_2(\mu\text{-Br})]$  with DMSO.

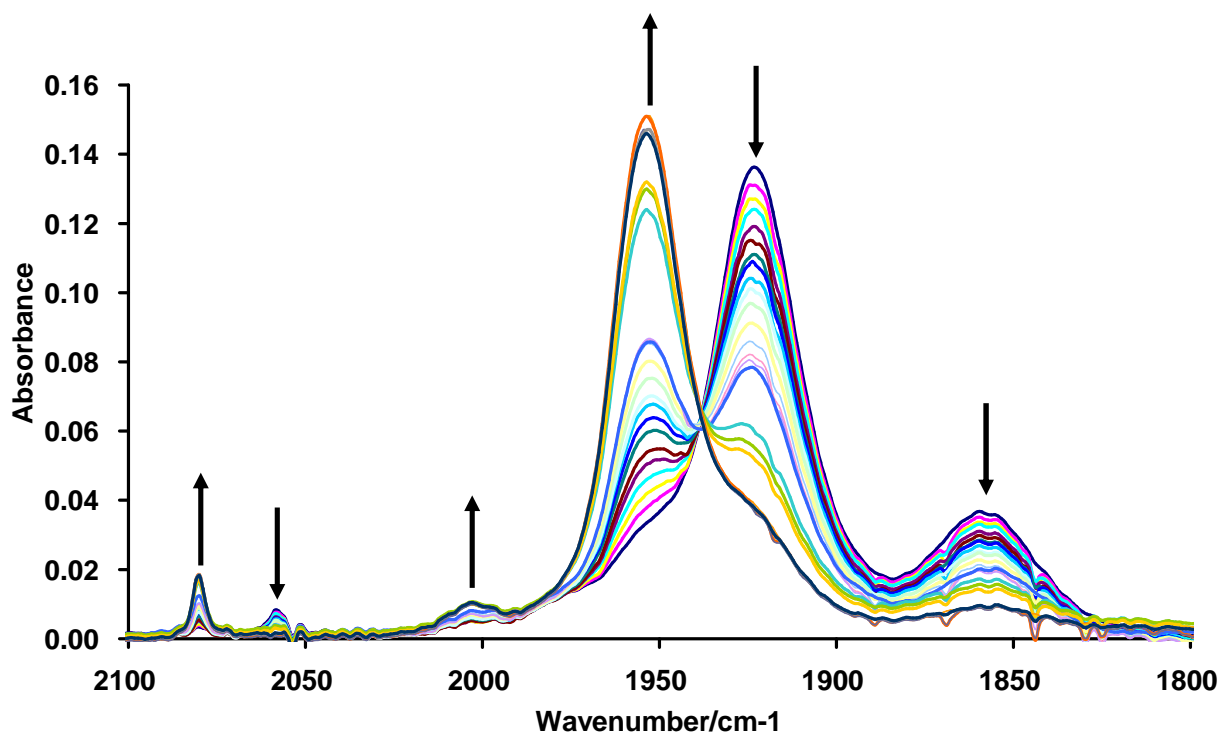

Fig 121. IR spectra illustrating the reaction of  $[\text{NEt}_4][\text{CrBr}(\text{CO})_5]$  with DMSO.

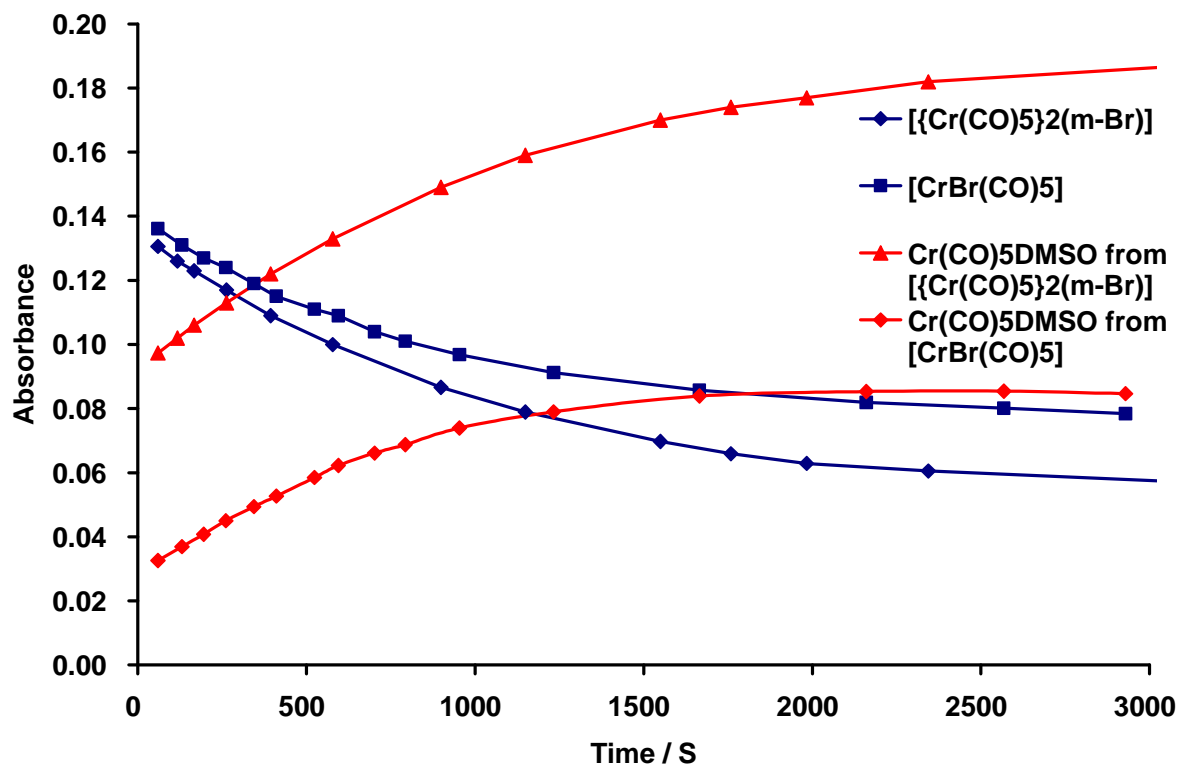

**Fig 122.** Comparison of the formation of  $\text{Cr}(\text{CO})_5(\text{DMSO})$  from  $[\text{NEt}_4][\text{CrBr}(\text{CO})_5]$  and  $[\text{NEt}_4][\{\text{Cr}(\text{CO})_5\}_2(\mu\text{-Br})]$

## 2.5. Degradation tests of $[\text{NEt}_4][\text{V}(\text{CO})_6]$

The degradation of  $[\text{NEt}_4][\text{V}(\text{CO})_6]$  in water was studied using the ReactIR system. Infra-red spectra of a 1.6 mM solution of  $[\text{NEt}_4][\text{V}(\text{CO})_6]$  thermostated at 37 °C were recorded at 30 s intervals. The band at  $\text{V}(\text{CO})_6^-$  at  $1830\text{ cm}^{-1}$  was observed to decrease intensity over a period of approximately 2 hours, sample spectra are shown in Fig. 98.

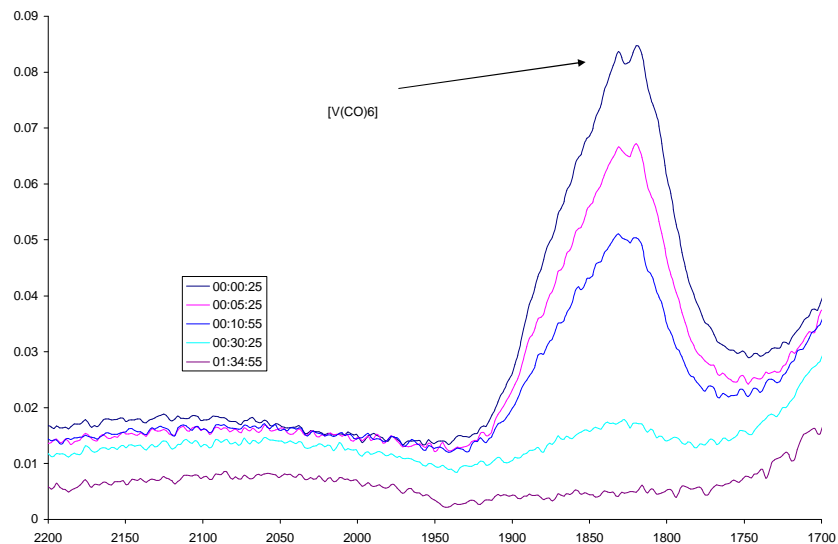

**Fig 123.**Infra-red spectra monitoring the degradation of  $[\text{NEt}_4][\text{V}(\text{CO})_6]$  (1.6mM) in  $\text{H}_2\text{O}$ .

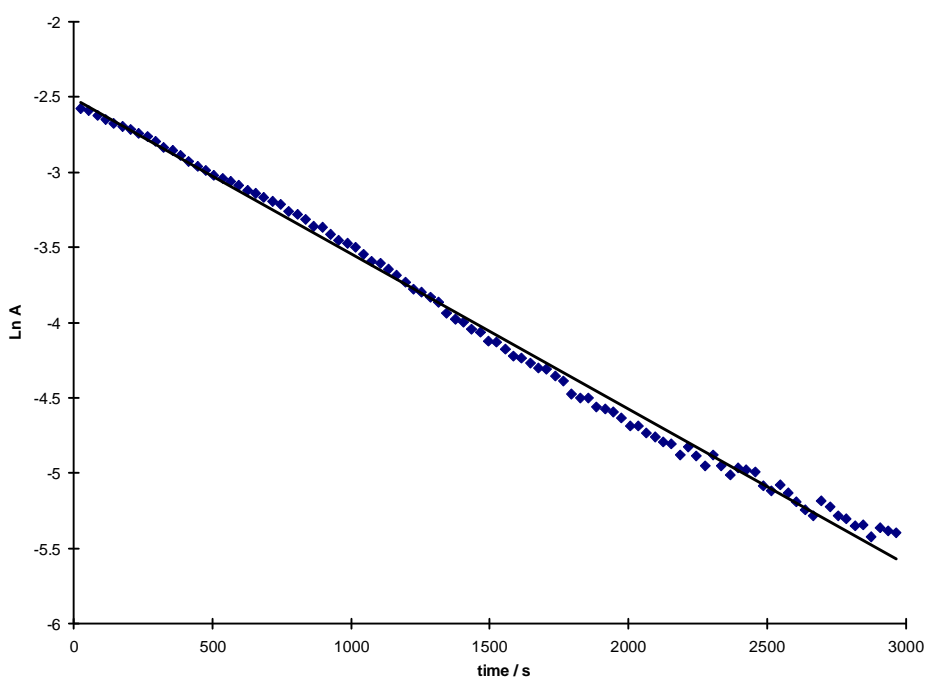

**Fig 124.**Degradation of  $[\text{V}(\text{CO})_6][\text{N}(\text{C}_2\text{H}_5)_4]$  in  $\text{H}_2\text{O}$  at  $37.8^\circ\text{C}$ , modeled with first-order kinetics with  $k = (1.03 \pm 0.01) \times 10^{-3}\text{ s}^{-1}$ .  $R^2 = 0.995$
